# Supplementary material
Source: PubMed Central journal article supplement (PMC6188675)
Supplement: NIHMS457713-supplement-1_si_001.pdf [file NIHMS457713-supplement-1_si_001.pdf]

## Supporting Information

### **Fragment-Based Discovery of 8-Hydroxyquinoline Inhibitors of the HIV-1 Integrase-LEDGF/p75 Interaction**

Erik Serrao, Bikash Debnath, Hiroyuki Otake, Yuting Kuang, Frauke Christ, Zeger Debyser, and Nouri Neamati

#### **Table of Contents:**

Page S1: Title Page

Page S2-5: Supplementary Figure 1

Page S6: Supplementary Figure 2

Page S7: Supplementary Table 1

Page S8-9: Supplementary Table 2

Page S10-50: NMR spectral data

**Supplementary Figure 1.** Structures of Inactive 8-Hydroxyquinoline Analogues Containing C2 and C6 Substitutions.

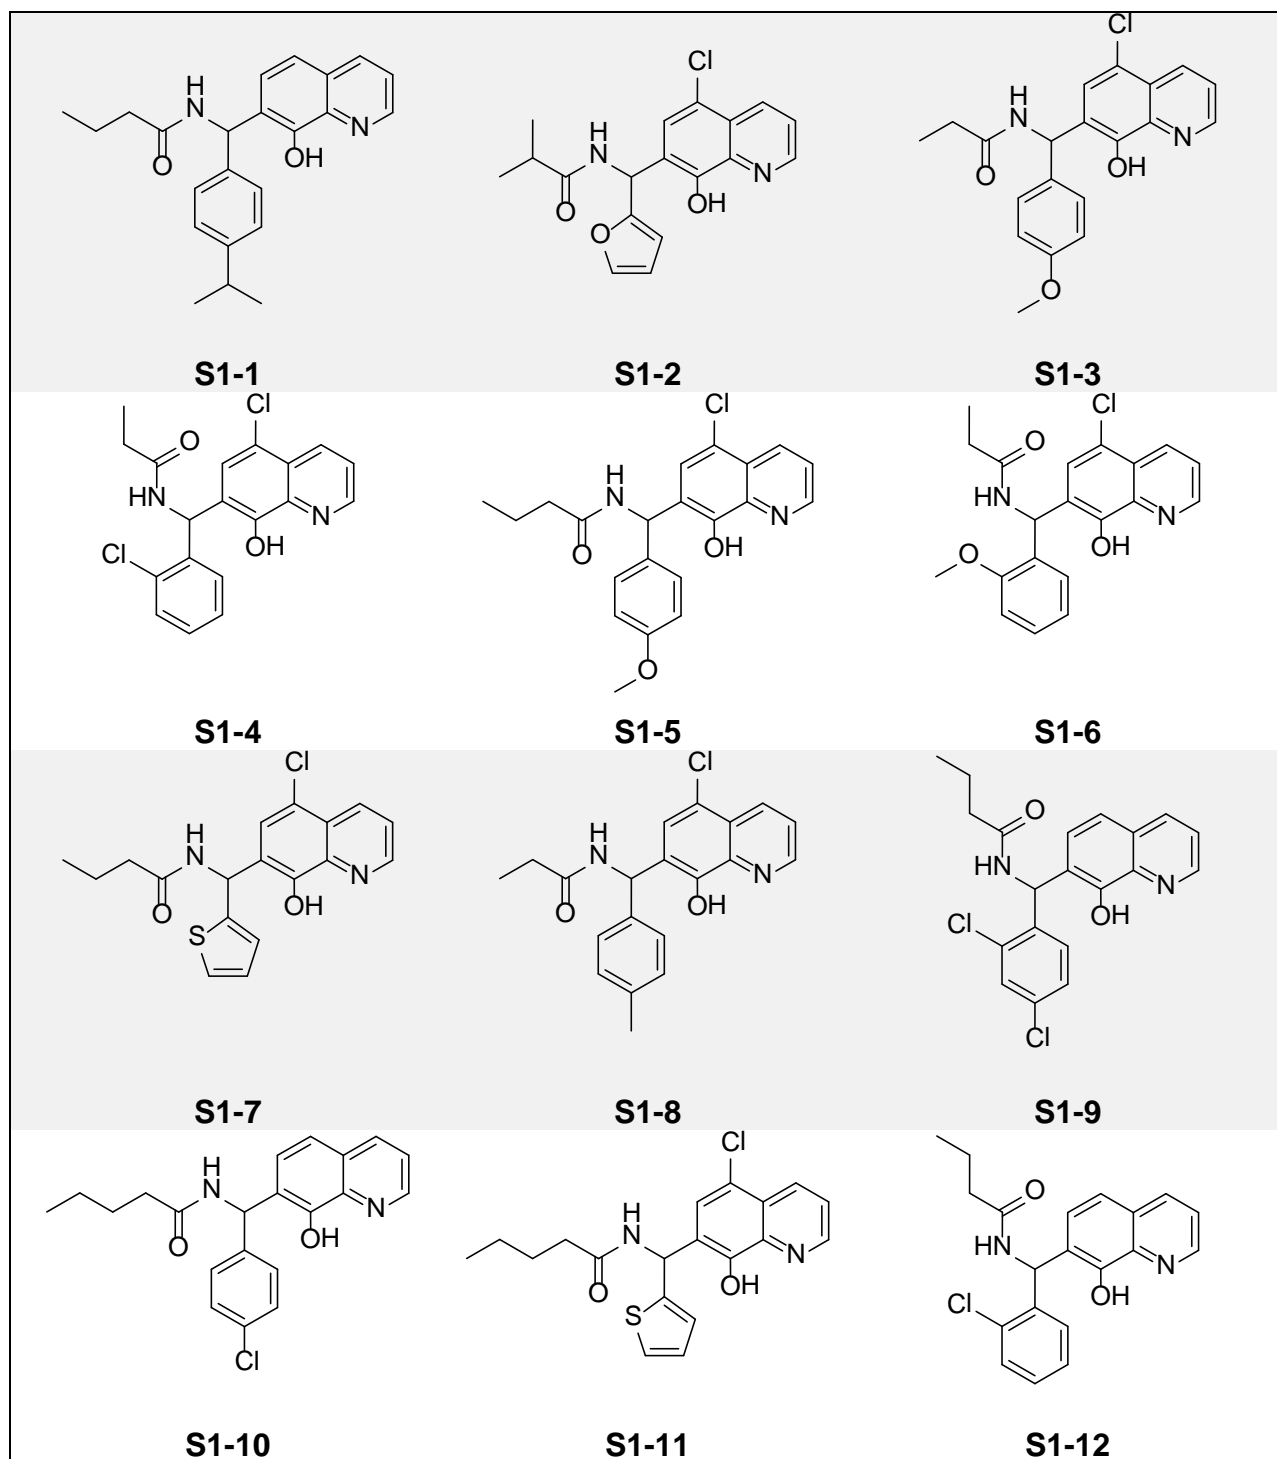

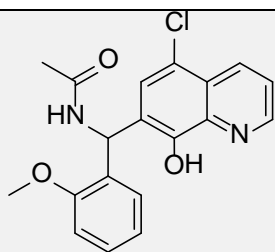

**S1-13**

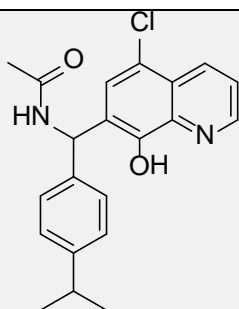

**S1-14**

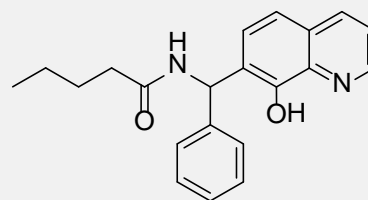

**S1-15**

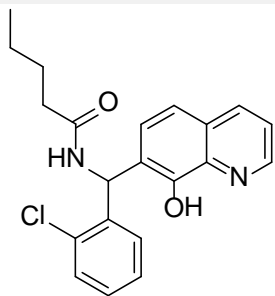

**S1-16**

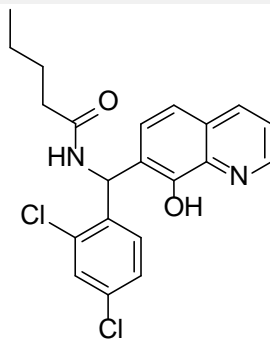

**S1-17**

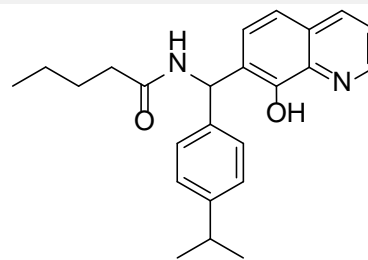

**S1-18**

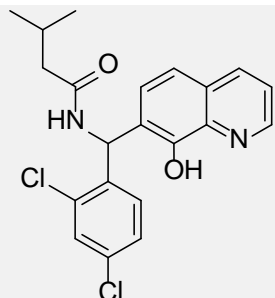

**S1-19**

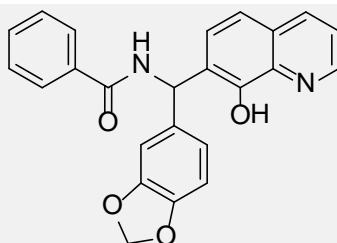

**S1-20**

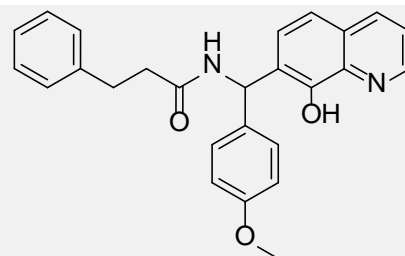

**S1-21**

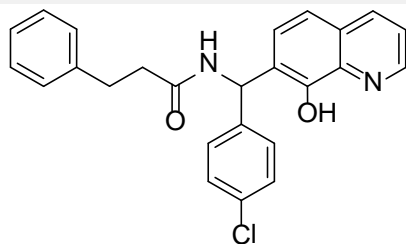

**S1-22**

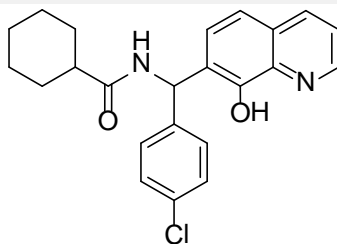

**S1-23**

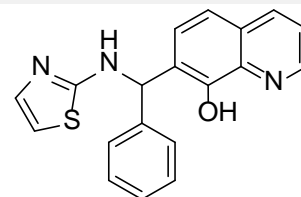

**S1-24**

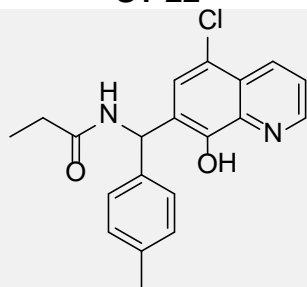

**S1-25**

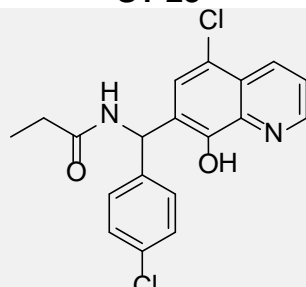

**S1-26**

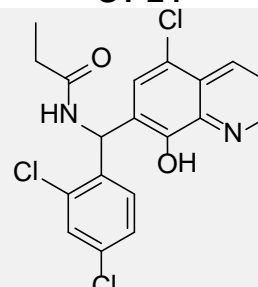

**S1-27**

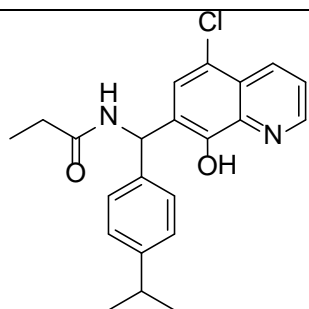

**S1-28**

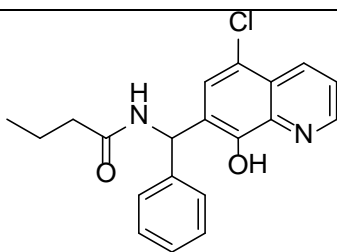

**S1-29**

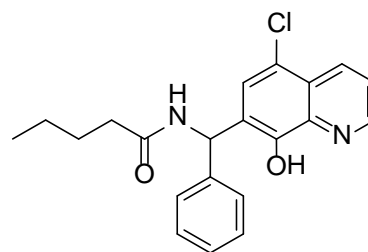

**S1-30**

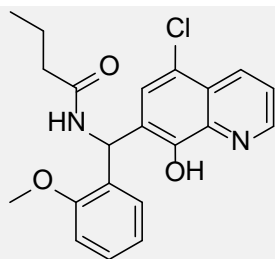

**S1-31**

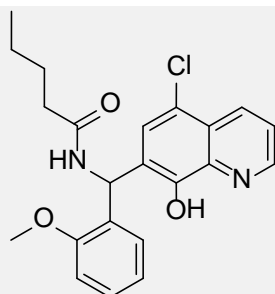

**S1-32**

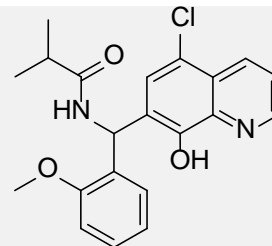

**S1-33**

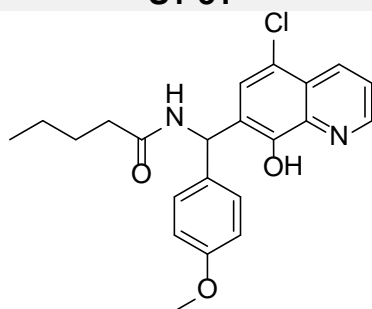

**S1-34**

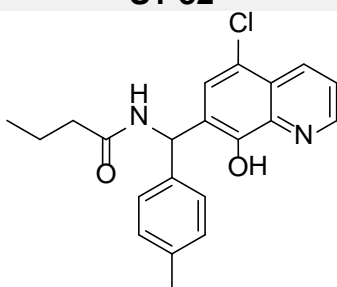

**S1-35**

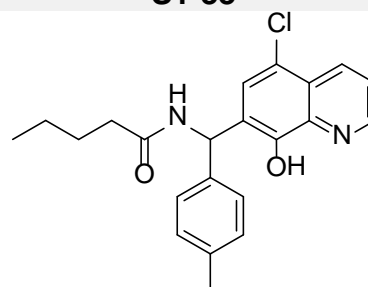

**S1-36**

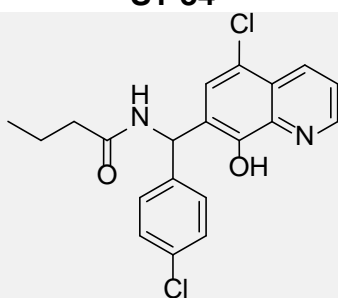

**S1-37**

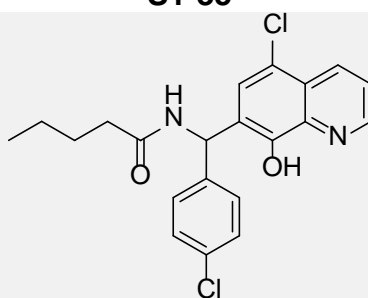

**S1-38**

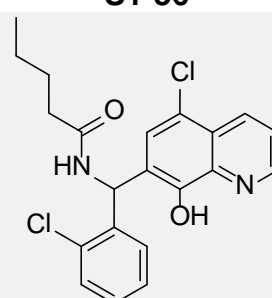

**S1-39**

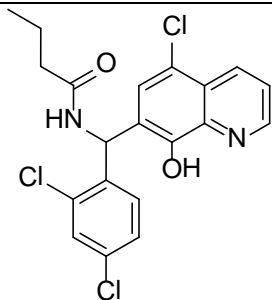

**S1-40**

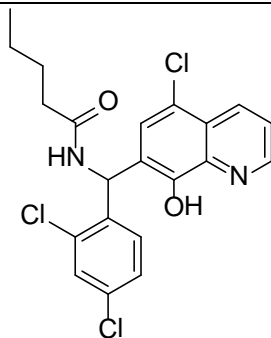

**S1-41**

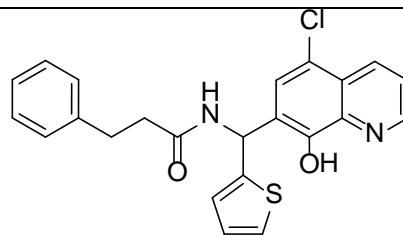

**S1-42**

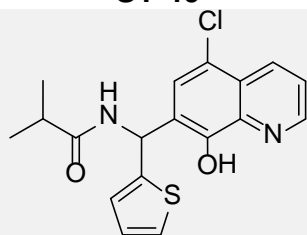

**S1-43**

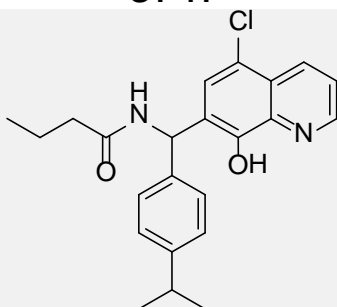

**S1-44**

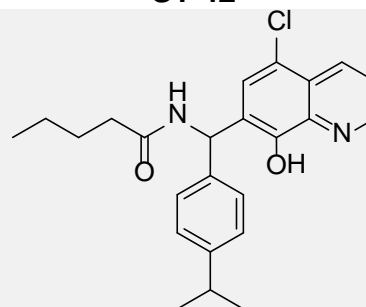

**S1-45**

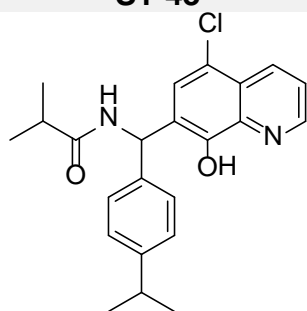

**S1-46**

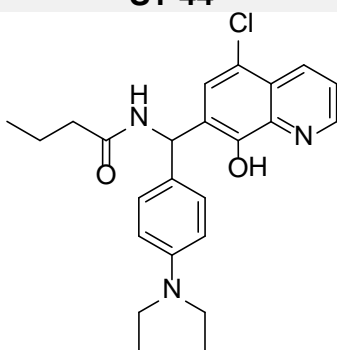

**S1-47**

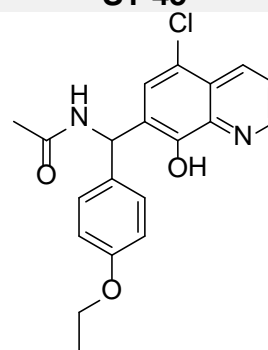

**S1-48**

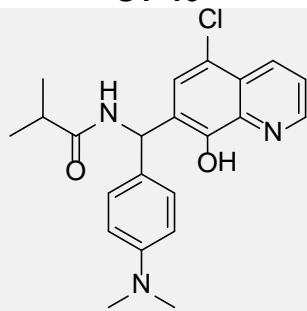

**S1-49**

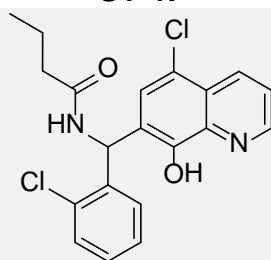

**S1-50**

**Supplementary Figure 2.** Molecular Docking Poses of Selected 8-Hydroxyquinolines. Top compounds exhibited highly similar binding modes, forming H-bonds with IN residues E170 or H171, in addition to packing variable hydrophobic moieties into the hydrophobic pocket formed by IN residues Ala 128, Ala 129, Gln 168, Trp 131, and Trp 132.

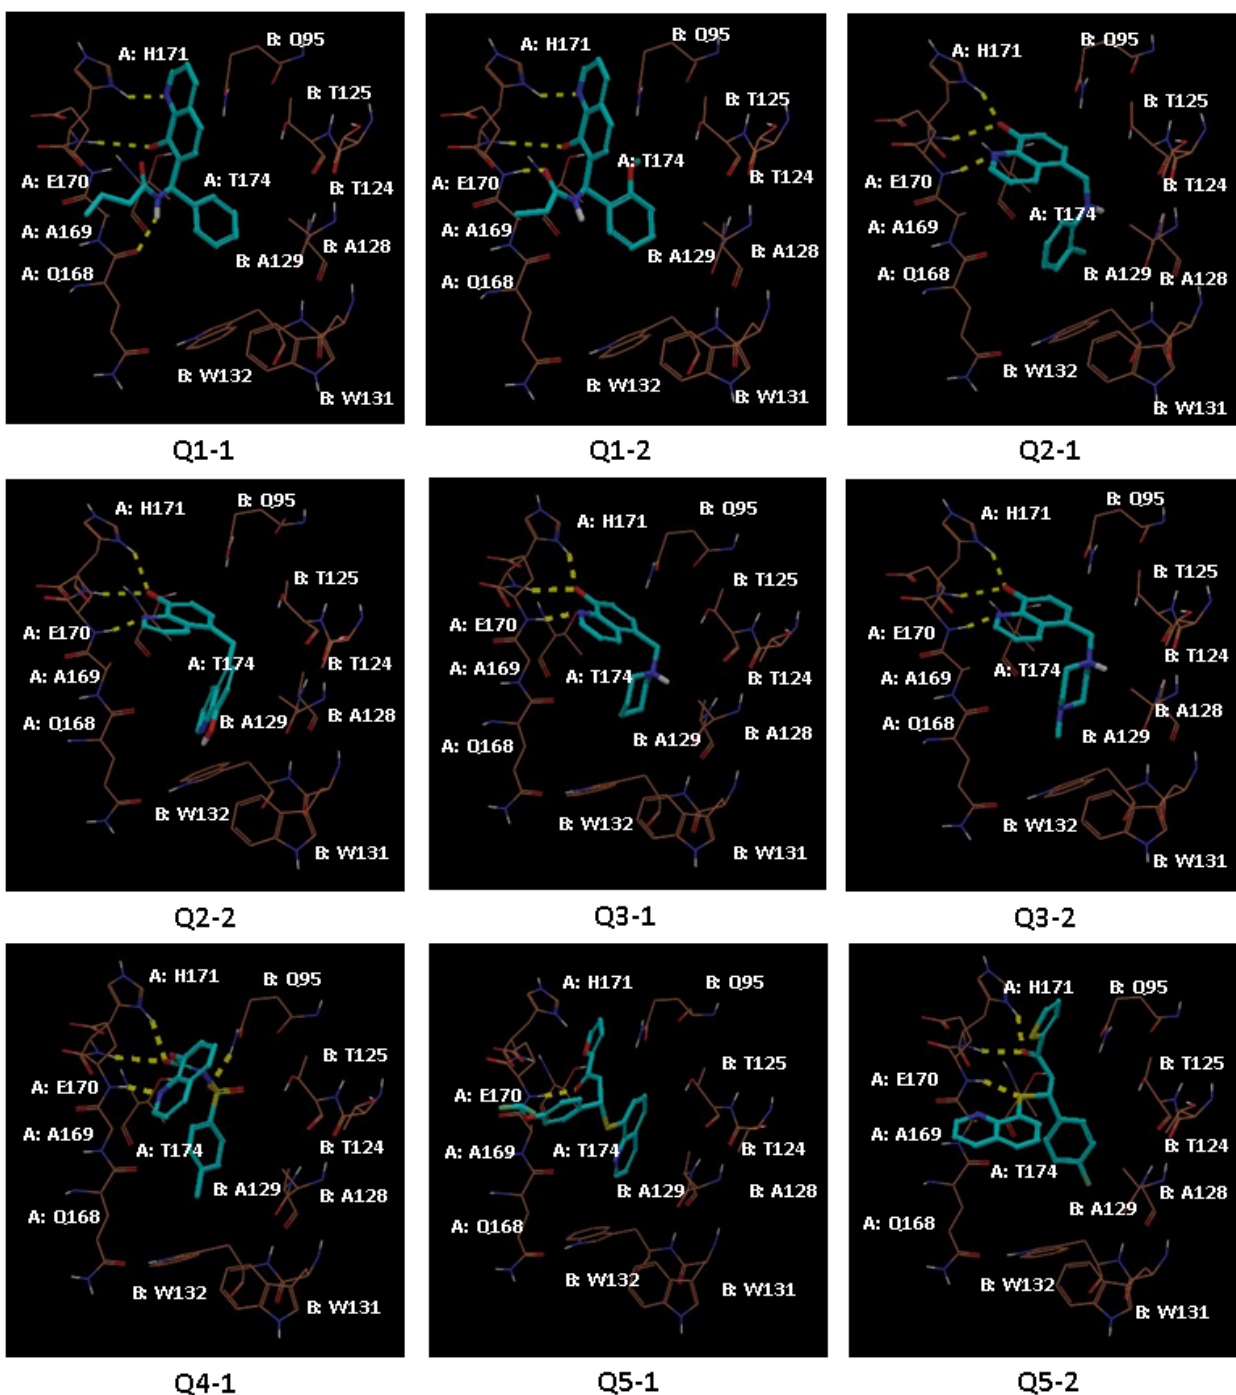

**Supplementary Table 1.** AlphaScreen Data for 8-Hydroxyquinoline Compounds with IC<sub>50</sub>

Values above 5  $\mu$ M.

| <b>Compound</b> | <b>IN-LEDGF (IC<sub>50</sub>, <math>\mu</math>M)</b> |
|-----------------|------------------------------------------------------|
| Q1-13           | 5.0 $\pm$ 1                                          |
| Q1-14           | 5.0 $\pm$ 5                                          |
| Q1-15           | 5.7 $\pm$ 1.7                                        |
| Q1-16           | 7.0 $\pm$ 5                                          |
| Q1-17           | 7.0 $\pm$ 5                                          |
| Q1-18           | 7.0 $\pm$ 4                                          |
| Q1-19           | 7.4 $\pm$ 2.9                                        |
| Q1-20           | 8.0 $\pm$ 6                                          |
| Q1-21           | 8.0 $\pm$ 6                                          |
| Q1-22           | 9.0 $\pm$ 9                                          |
| Q1-23           | 9.9 $\pm$ 1.6                                        |
| Q1-24           | 10 $\pm$ 5                                           |
| Q1-25           | 11 $\pm$ 7                                           |
| Q1-26           | 12 $\pm$ 5                                           |
| Q1-27           | 13 $\pm$ 5                                           |
| Q1-28           | 13 $\pm$ 9                                           |
| Q1-29           | 14 $\pm$ 10                                          |
| Q1-30           | 14 $\pm$ 7                                           |
| Q1-31           | 14 $\pm$ 8                                           |
| Q1-32           | 15 $\pm$ 0                                           |
| Q1-33           | 16 $\pm$ 3                                           |
| Q1-34           | 17 $\pm$ 3                                           |
| Q1-35           | 19 $\pm$ 7                                           |
| Q2-15           | 5.2 $\pm$ 3.3                                        |
| Q2-16           | 10.9 $\pm$ 3.8                                       |
| Q3-10           | 12.5 $\pm$ 4.9                                       |
| Q4-2            | 5.0 $\pm$ 1                                          |
| Q4-3            | 6.0 $\pm$ 1                                          |
| Q4-4            | 10.7 $\pm$ 1.8                                       |
| Q4-5            | >20                                                  |
| Q4-6            | >20                                                  |
| Q4-7            | >20                                                  |
| Q5-3            | 5.0 $\pm$ 2                                          |

**Supplementary Table 2.** Hydrogen bond distances between ligand and protein atoms.

| <b>Ligand</b> | <b>Protein atom</b>  | <b>Ligand atom</b> | <b>Distance (Å)</b> |
|---------------|----------------------|--------------------|---------------------|
| <b>Q</b>      | B:Q95-side chain NH  | Quinolino N        | 2.095               |
| <b>8-OH-Q</b> | A:H171-side chain NH | 8-O <sup>-</sup>   | 1.703               |
|               | A:H171-backbone NH   | 8-O <sup>-</sup>   | 2.626               |
|               | A:E170-backbone NH   | Quinolino N        | 1.957               |
| <b>QA</b>     | A:H171-side chain NH | 8-O <sup>-</sup>   | 1.711               |
|               | A:H171-backbone NH   | 8-O <sup>-</sup>   | 2.592               |
|               | A:E170-backbone NH   | Quinolino N        | 2.008               |
| <b>QB</b>     | A:H171-backbone NH   | 8-O <sup>-</sup>   | 2.956               |
|               | A:E170-backbone NH   | Quinolino N        | 1.868               |
| <b>QC</b>     | A:H171-side chain NH | 8-O <sup>-</sup>   | 1.707               |
|               | A:H171-backbone NH   | 8-O <sup>-</sup>   | 2.608               |
|               | A:E170-backbone NH   | Quinolino N        | 1.986               |
| <b>Q1-1</b>   | A:H171-side chain NH | Quinolino N        | 2.154               |
|               | A:H171-backbone NH   | 8-O <sup>-</sup>   | 2.847               |
|               | A:Q168-backbone NH   | CONH               | 2.214               |
| <b>Q1-2</b>   | A:H171-side chain NH | Quinolino N        | 2.145               |
|               | A:H171-backbone NH   | 8-O <sup>-</sup>   | 2.872               |
|               | A:E170-backbone NH   | C=O                | 2.336               |
| <b>Q2-1</b>   | A:H171-side chain NH | 8-O <sup>-</sup>   | 1.882               |
|               | A:H171-backbone NH   | 8-O <sup>-</sup>   | 2.635               |
|               | A:E170-backbone NH   | Quinolino N        | 2.014               |
| <b>Q2-2</b>   | A:H171-side chain NH | 8-O <sup>-</sup>   | 2.389               |
|               | A:H171-backbone NH   | 8-O <sup>-</sup>   | 2.497               |
|               | A:E170-backbone NH   | Quinolino N        | 2.059               |
| <b>Q3-1</b>   | A:H171-side chain NH | 8-O <sup>-</sup>   | 1.983               |
|               | A:H171-backbone NH   | 8-O <sup>-</sup>   | 2.460               |
|               | A:E170-backbone NH   | Quinolino N        | 2.000               |
| <b>Q3-2</b>   | A:H171-side chain NH | 8-O <sup>-</sup>   | 1.980               |
|               | A:H171-backbone NH   | 8-O <sup>-</sup>   | 2.440               |
|               | A:E170-backbone NH   | Quinolino N        | 1.926               |
| <b>Q4-1</b>   | A:H171-side chain NH | C=O                | 2.394               |
|               | A:H171-backbone NH   | C=O                | 2.862               |



|             |                      |             |       |
|-------------|----------------------|-------------|-------|
|             | A:E170-backbone NH   | Quinolino N | 2.264 |
|             | B:Q95-side chain NH  | S=O         | 2.256 |
| <b>Q5-1</b> | A:E170-backbone NH   | C=O         | 2.005 |
| <b>Q5-2</b> | A:H171-side chain NH | C=O         | 2.041 |
|             | A:H171-backbone NH   | C=O         | 2.427 |
|             | A:E170-backbone NH   | 8-S         | 2.512 |

NKTA B0659434

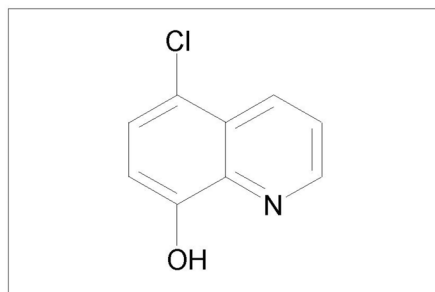

BSI 0006815

\*0659434\*

C<sub>9</sub>H<sub>6</sub>ClNO

179.6073

BAS 0659434

18.11.99

Solv. DMSO

QA

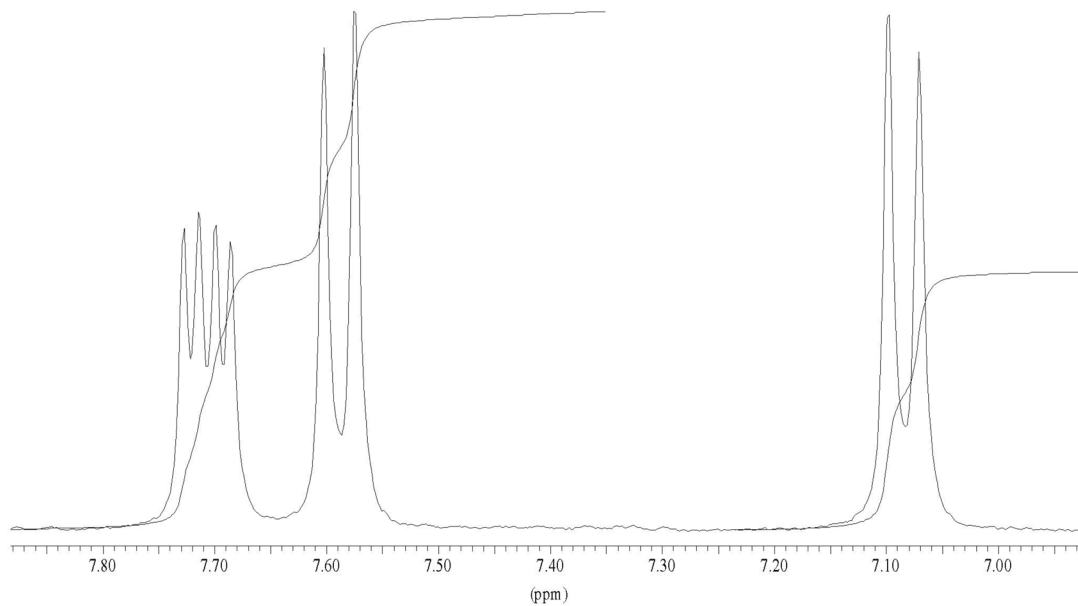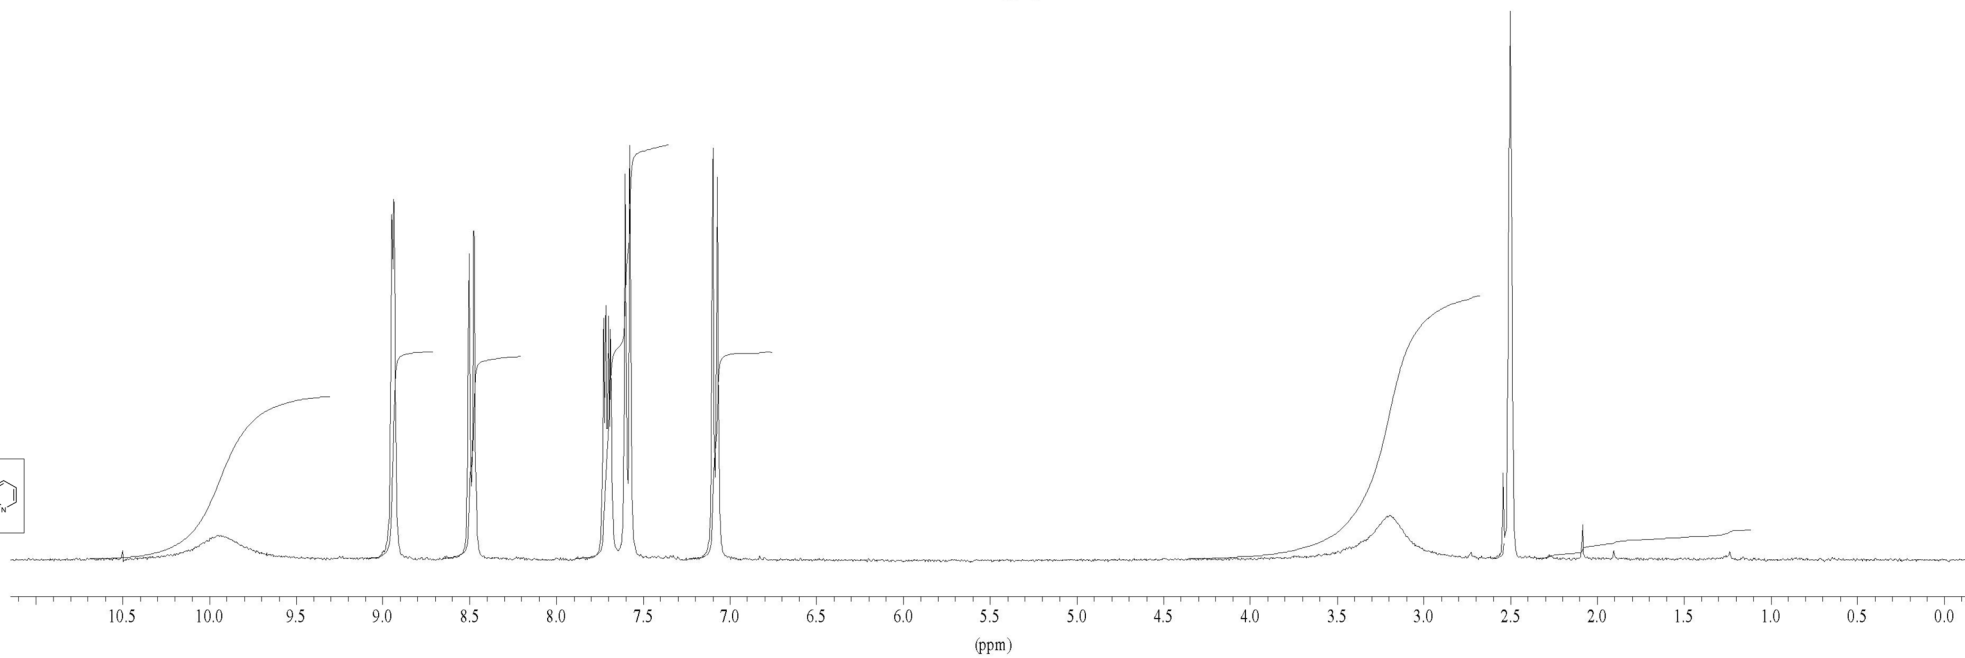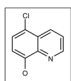

\*196237\*

LA

QB

|                                                                                   |          |
|-----------------------------------------------------------------------------------|----------|
| Solvent: DMSO                                                                     |          |
| 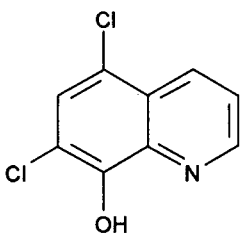 |          |
| BSI 0006887                                                                       |          |
|  |          |
| C <sub>9</sub> H <sub>5</sub> Cl <sub>2</sub> NO                                  | 214.0523 |

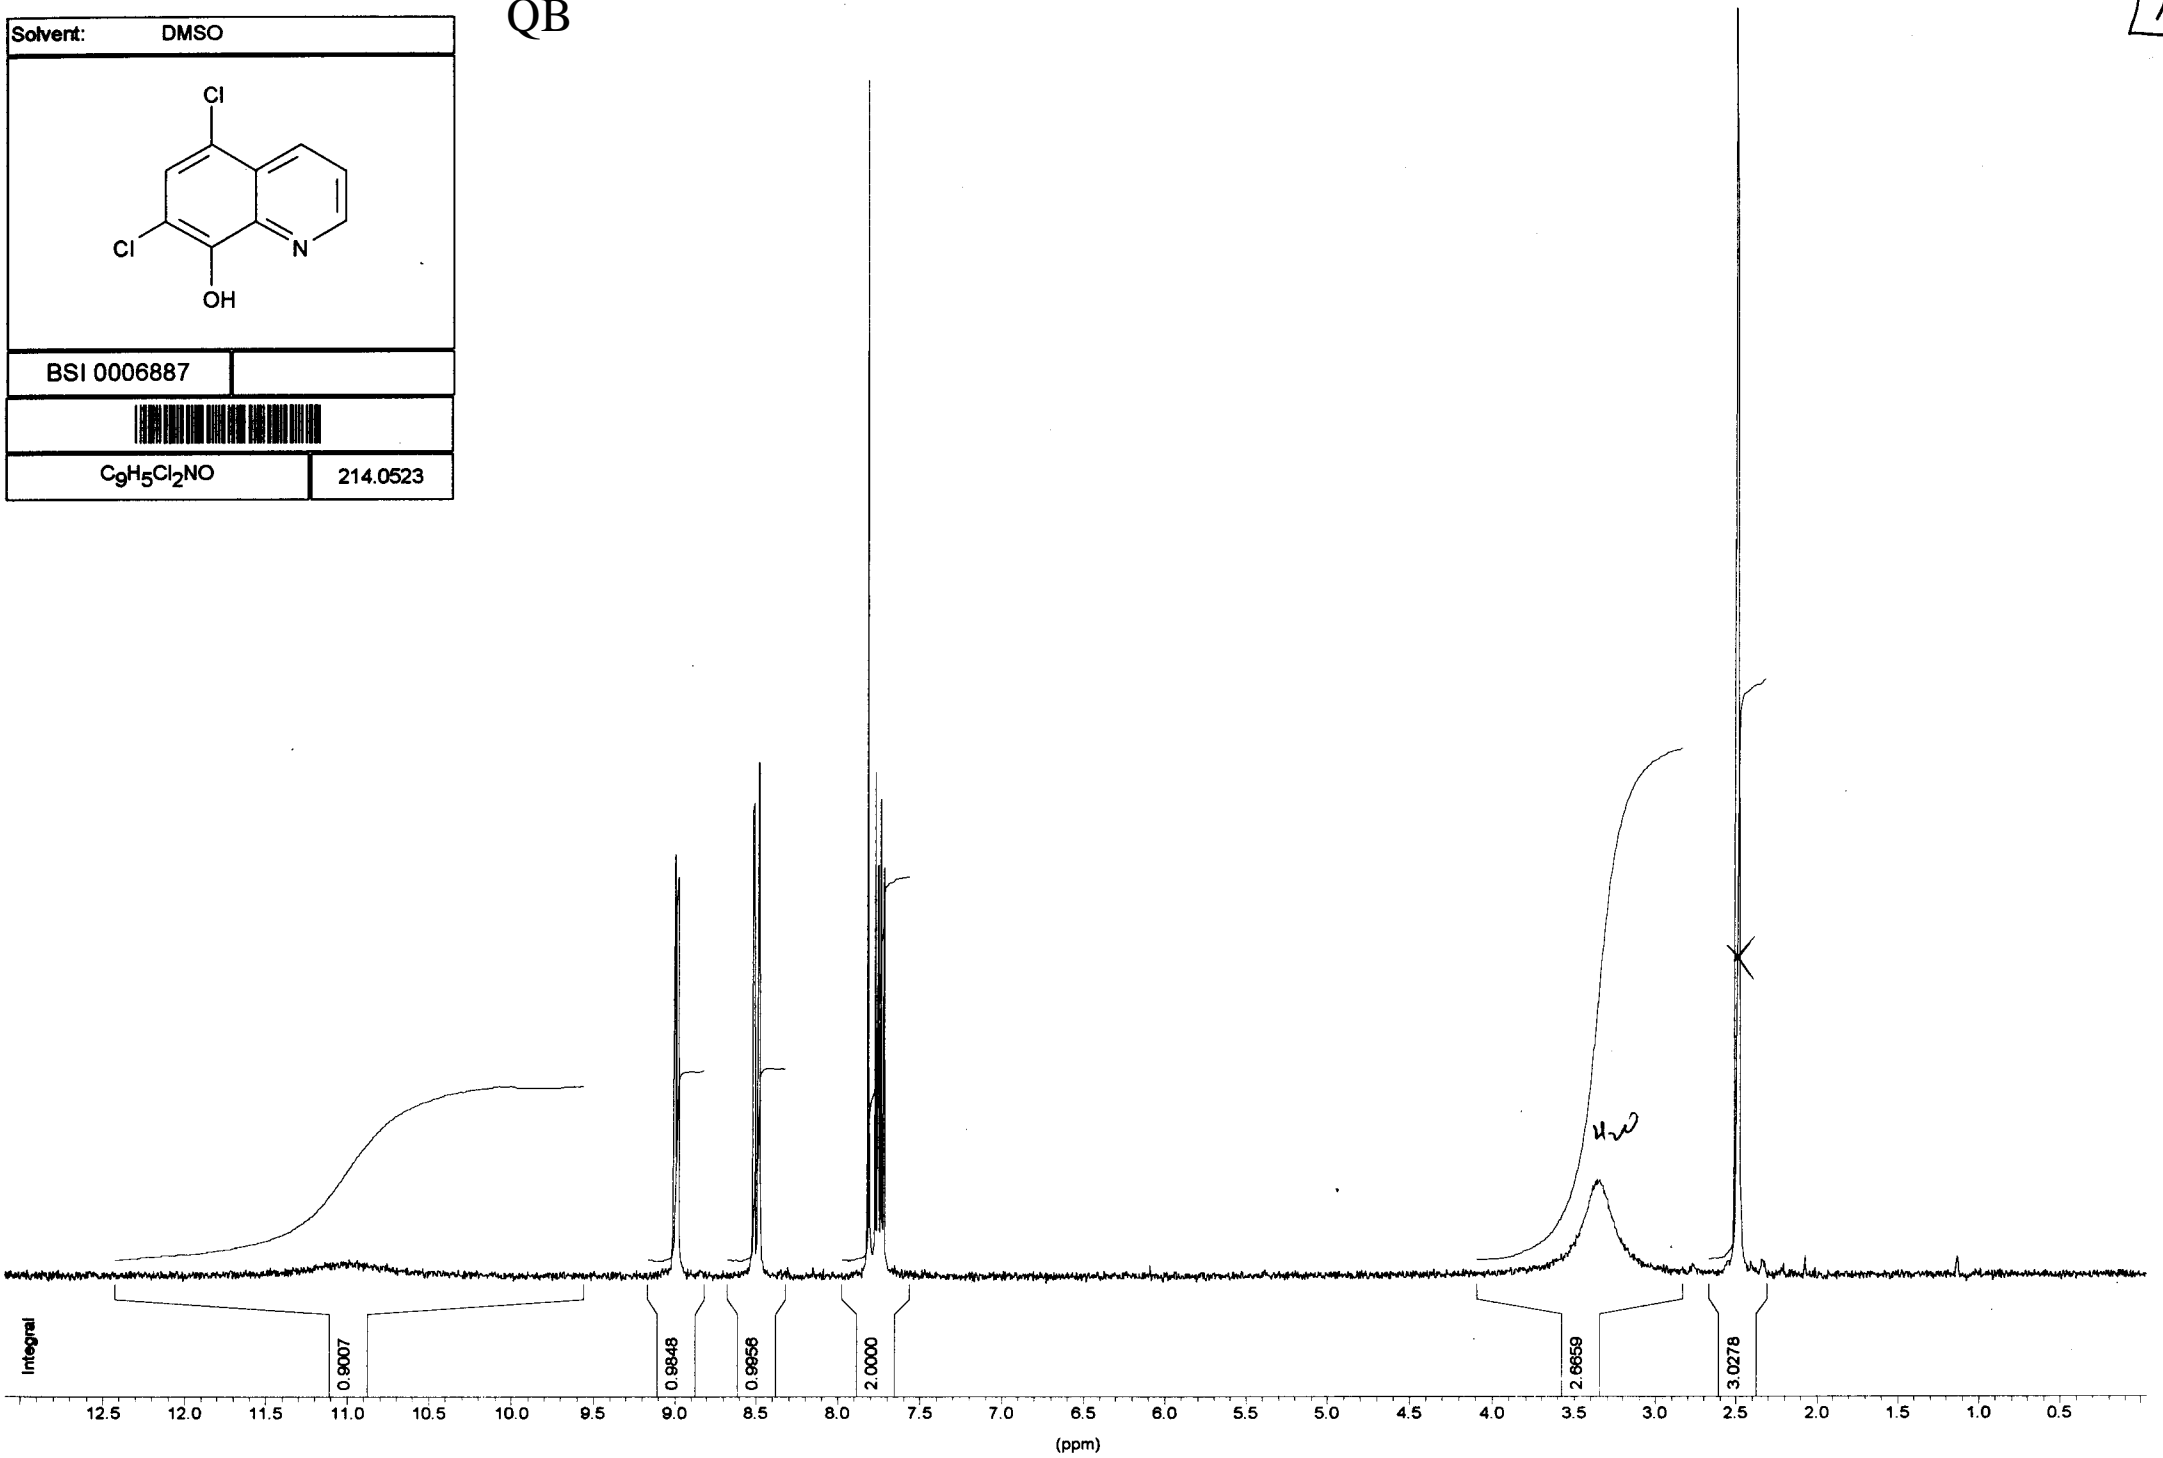

/VSVU 242.RK0

QC

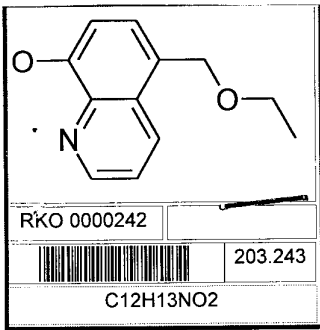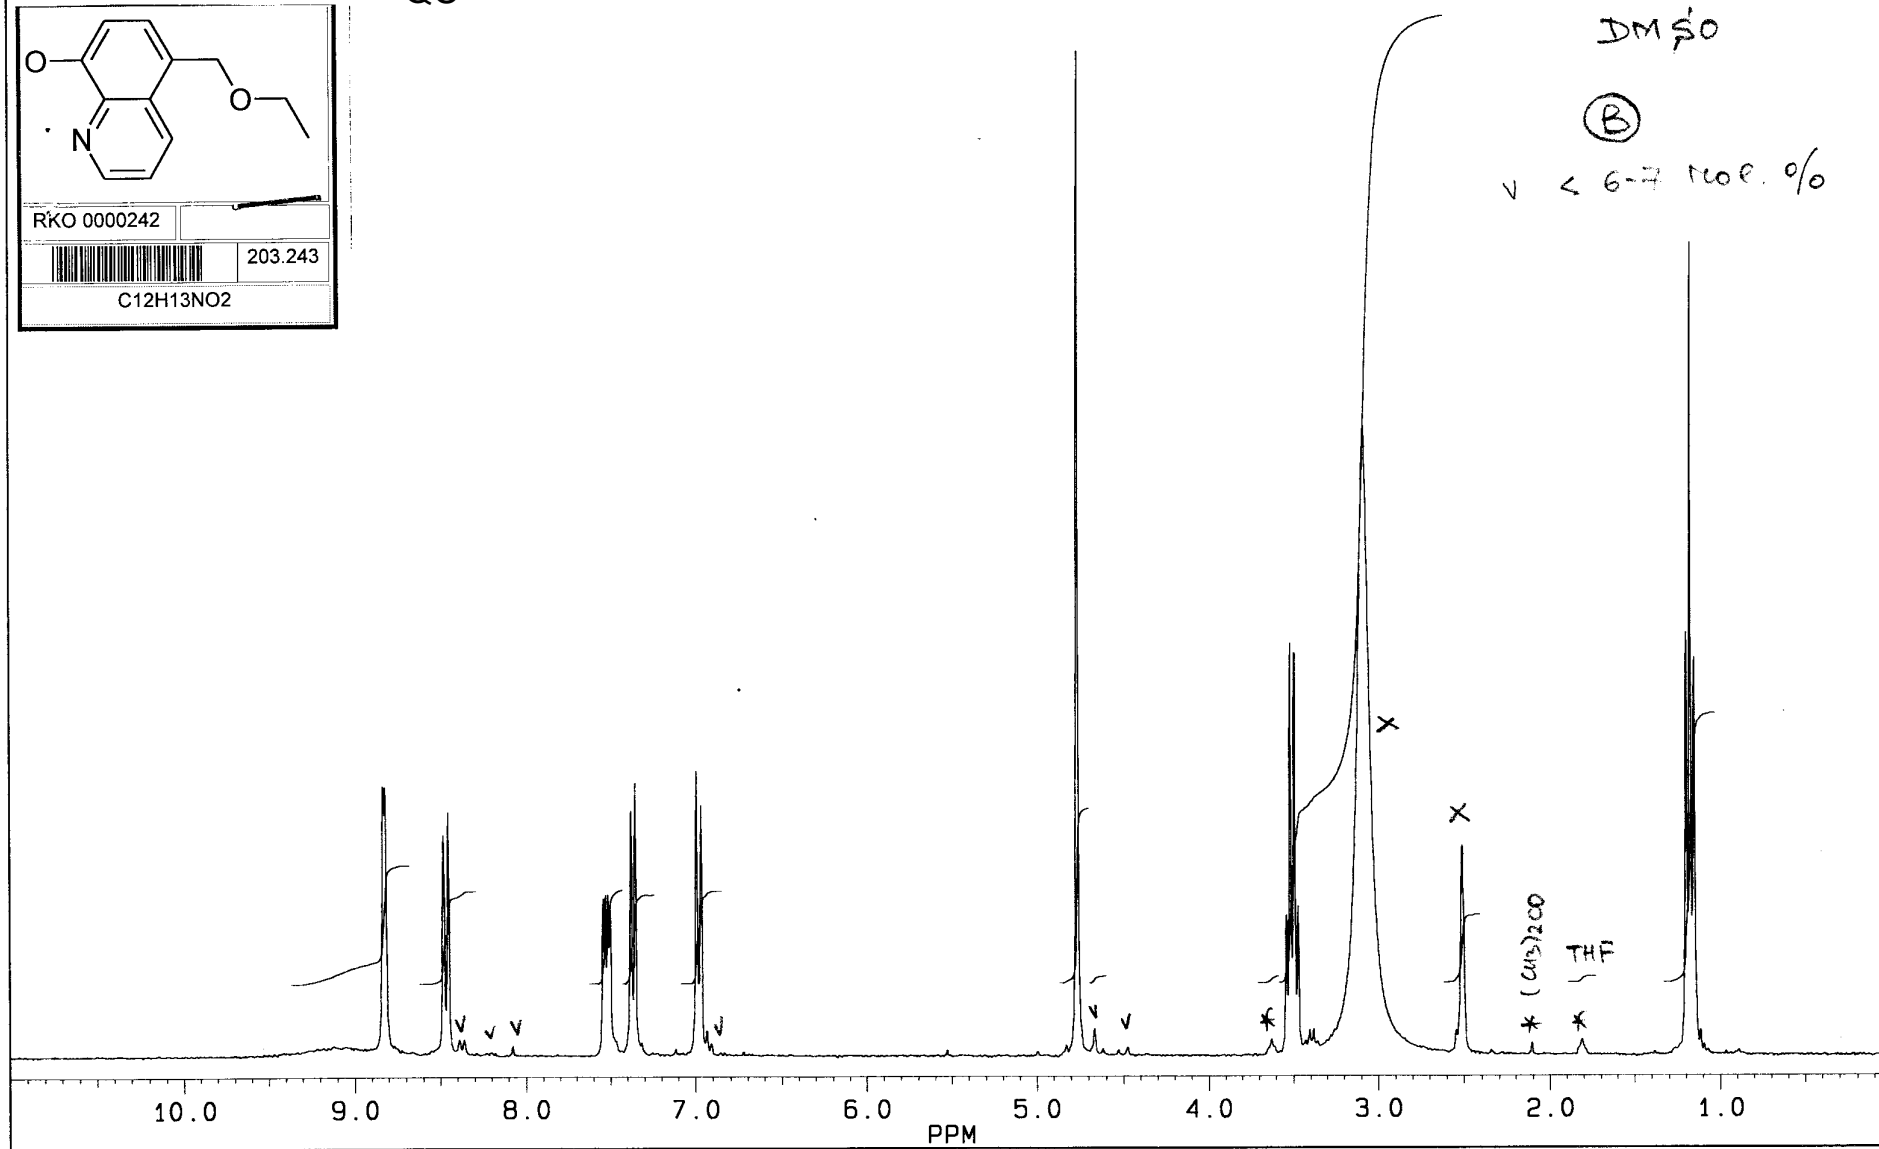

20

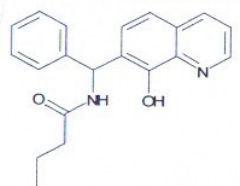

Q1-1

|                                                               |                         |
|---------------------------------------------------------------|-------------------------|
| FRK 0000012                                                   | 0467120                 |
| *1277872*                                                     |                         |
| C <sub>20</sub> H <sub>20</sub> N <sub>2</sub> O <sub>2</sub> | 320.39                  |
| BAS 1277872                                                   | 01.11.200 Solvent: DMSO |

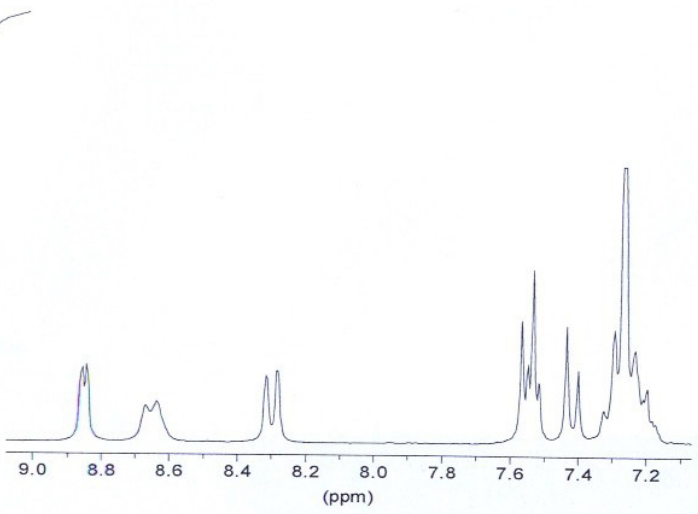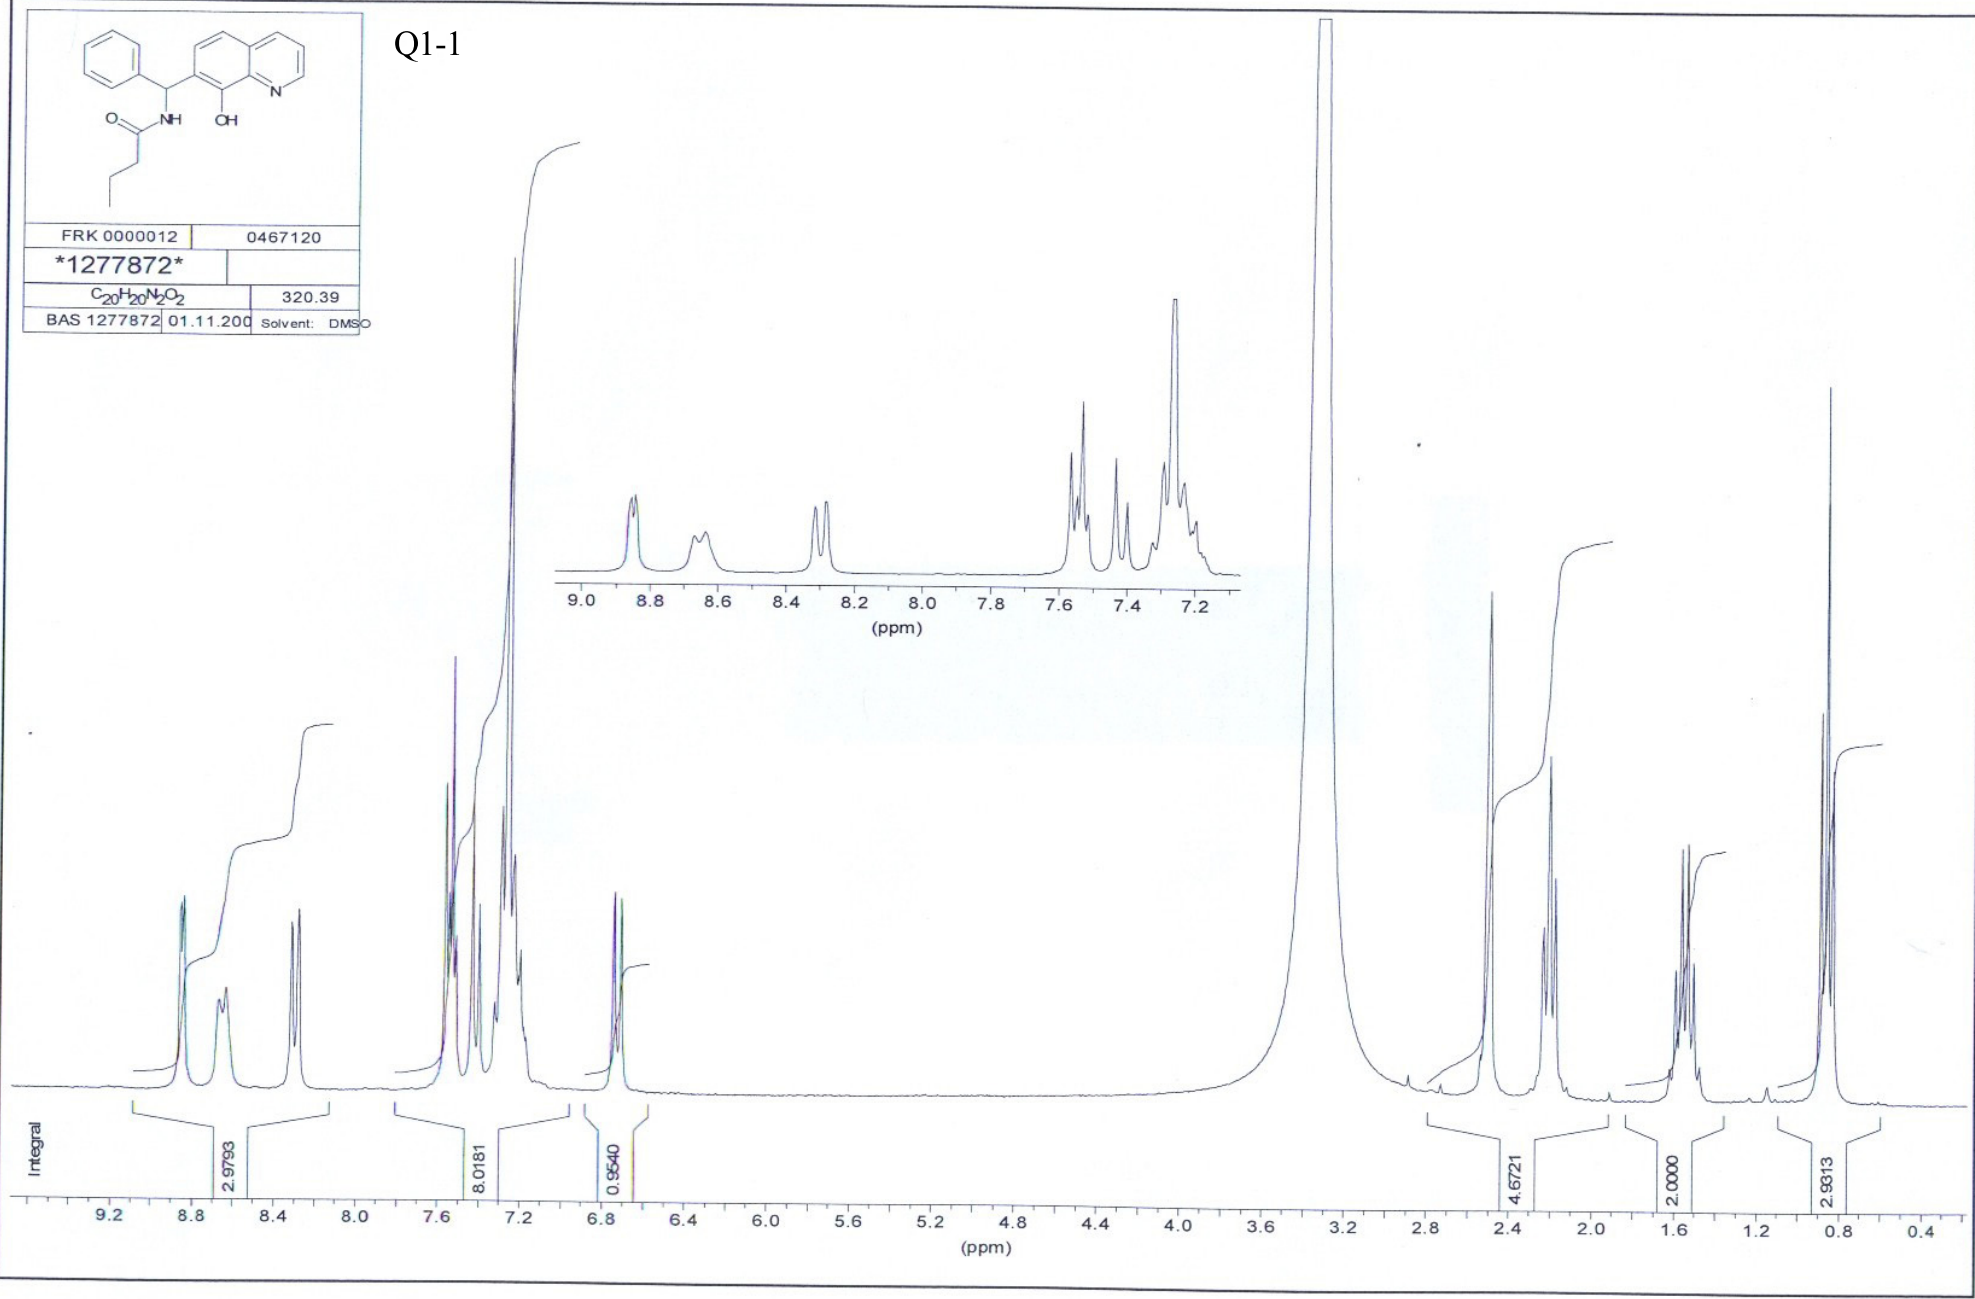

BAS 1277866

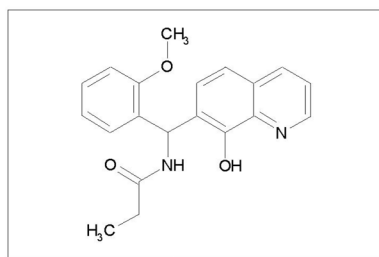

FRK 0000006

\*1277866\*

C<sub>20</sub>H<sub>20</sub>N<sub>2</sub>O<sub>3</sub>

336.3940

BAS 1277866

0493844

19.04.2003

Solv. DMSO

Q1-2

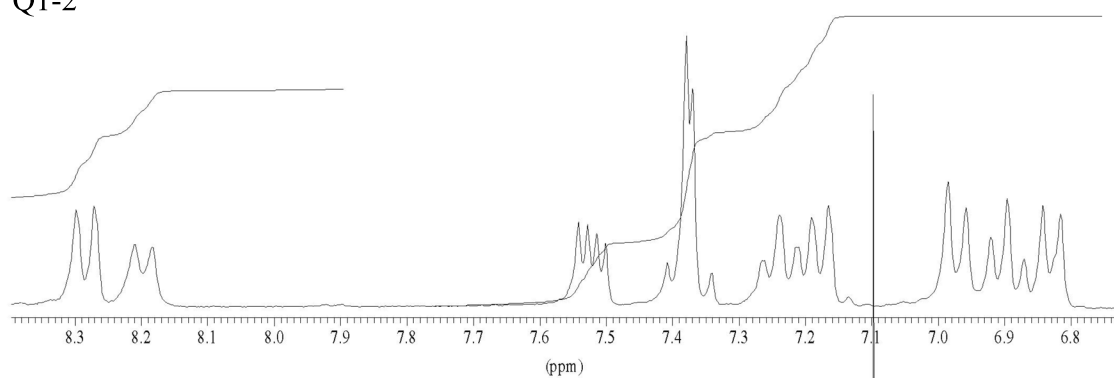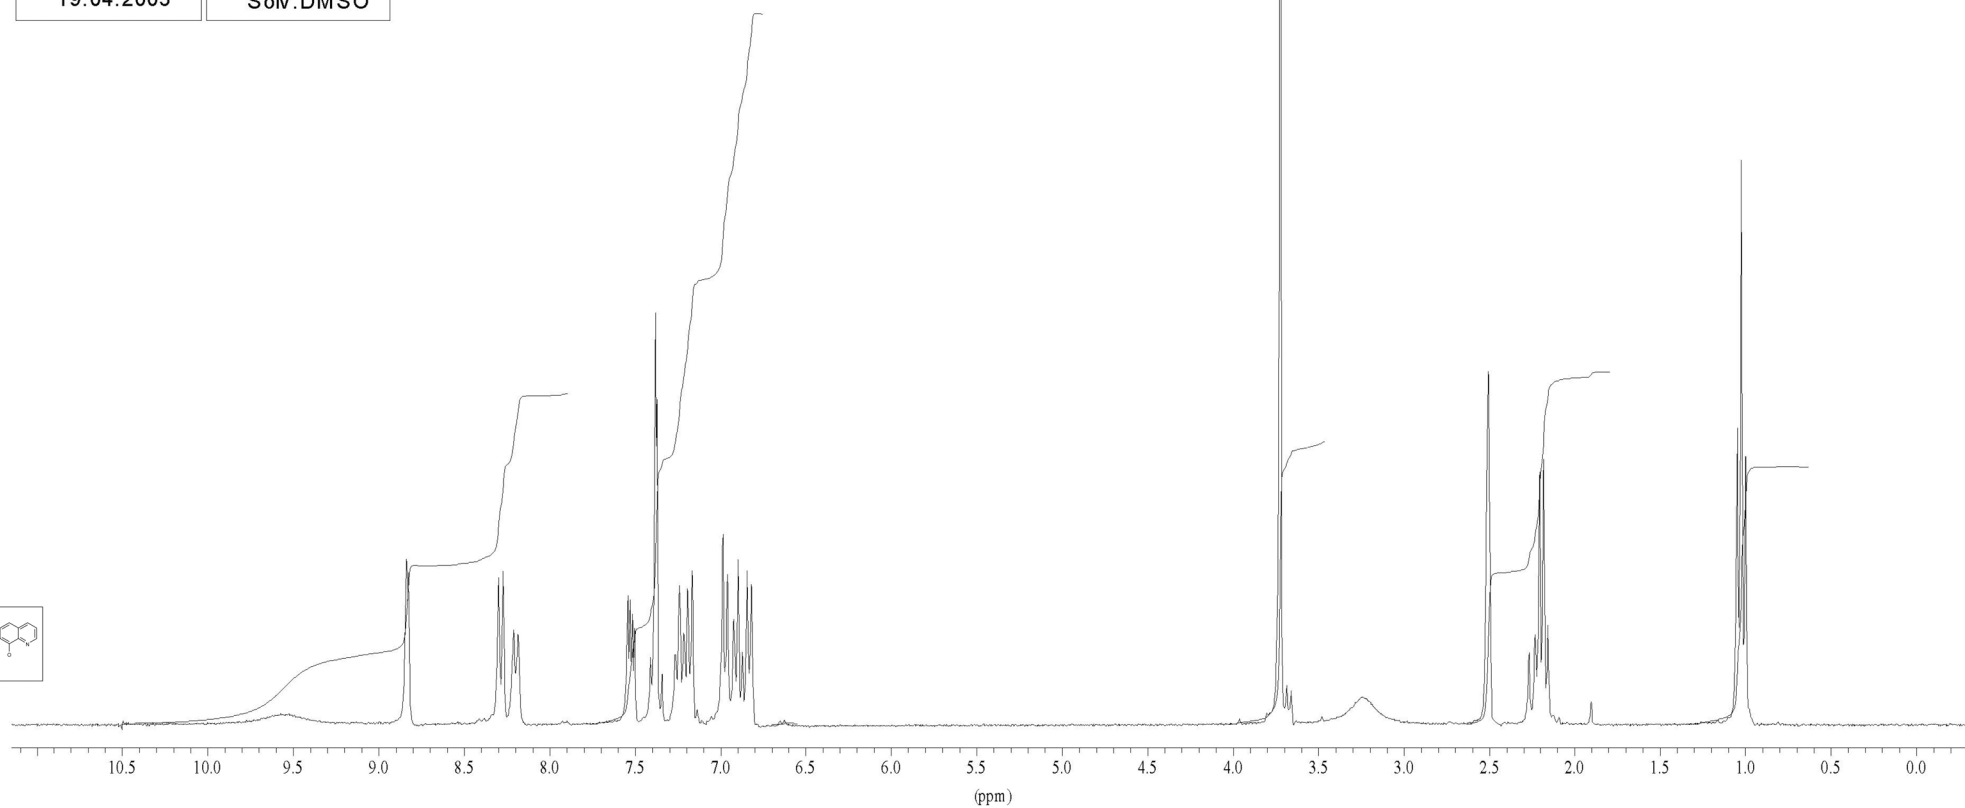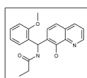

\*493844\*

18

Q1-3

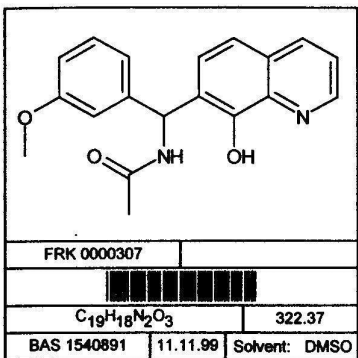

Σ = 100%

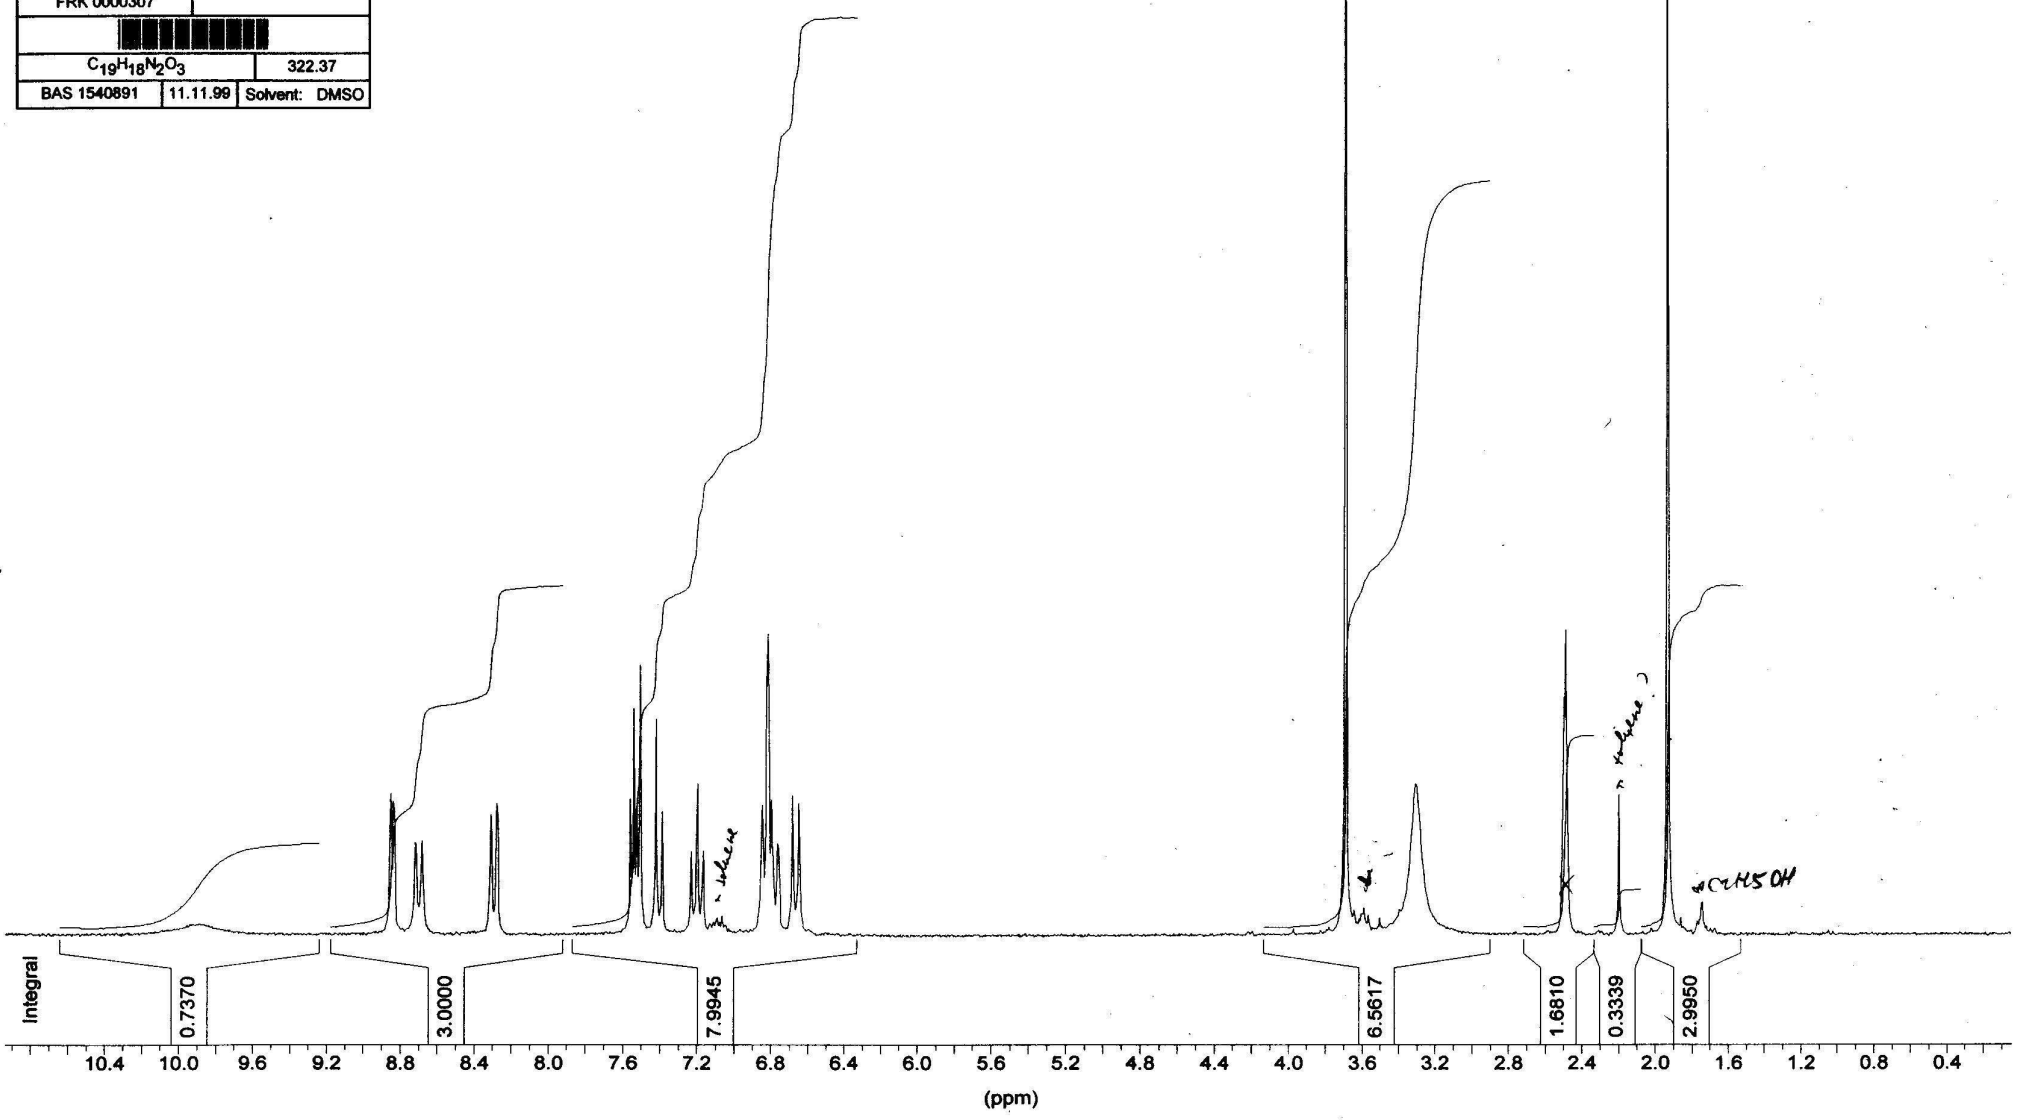

Q1-4

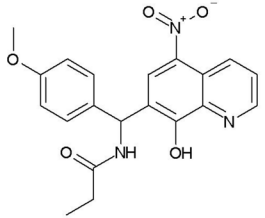

|                                                               |                         |
|---------------------------------------------------------------|-------------------------|
| FRK0000497                                                    | 272804                  |
| <b>*2169234*</b>                                              |                         |
| C <sub>20</sub> H <sub>19</sub> N <sub>3</sub> O <sub>5</sub> | 381.39                  |
| BAS 2169234                                                   | 28.09.200 Solvent: DMSO |

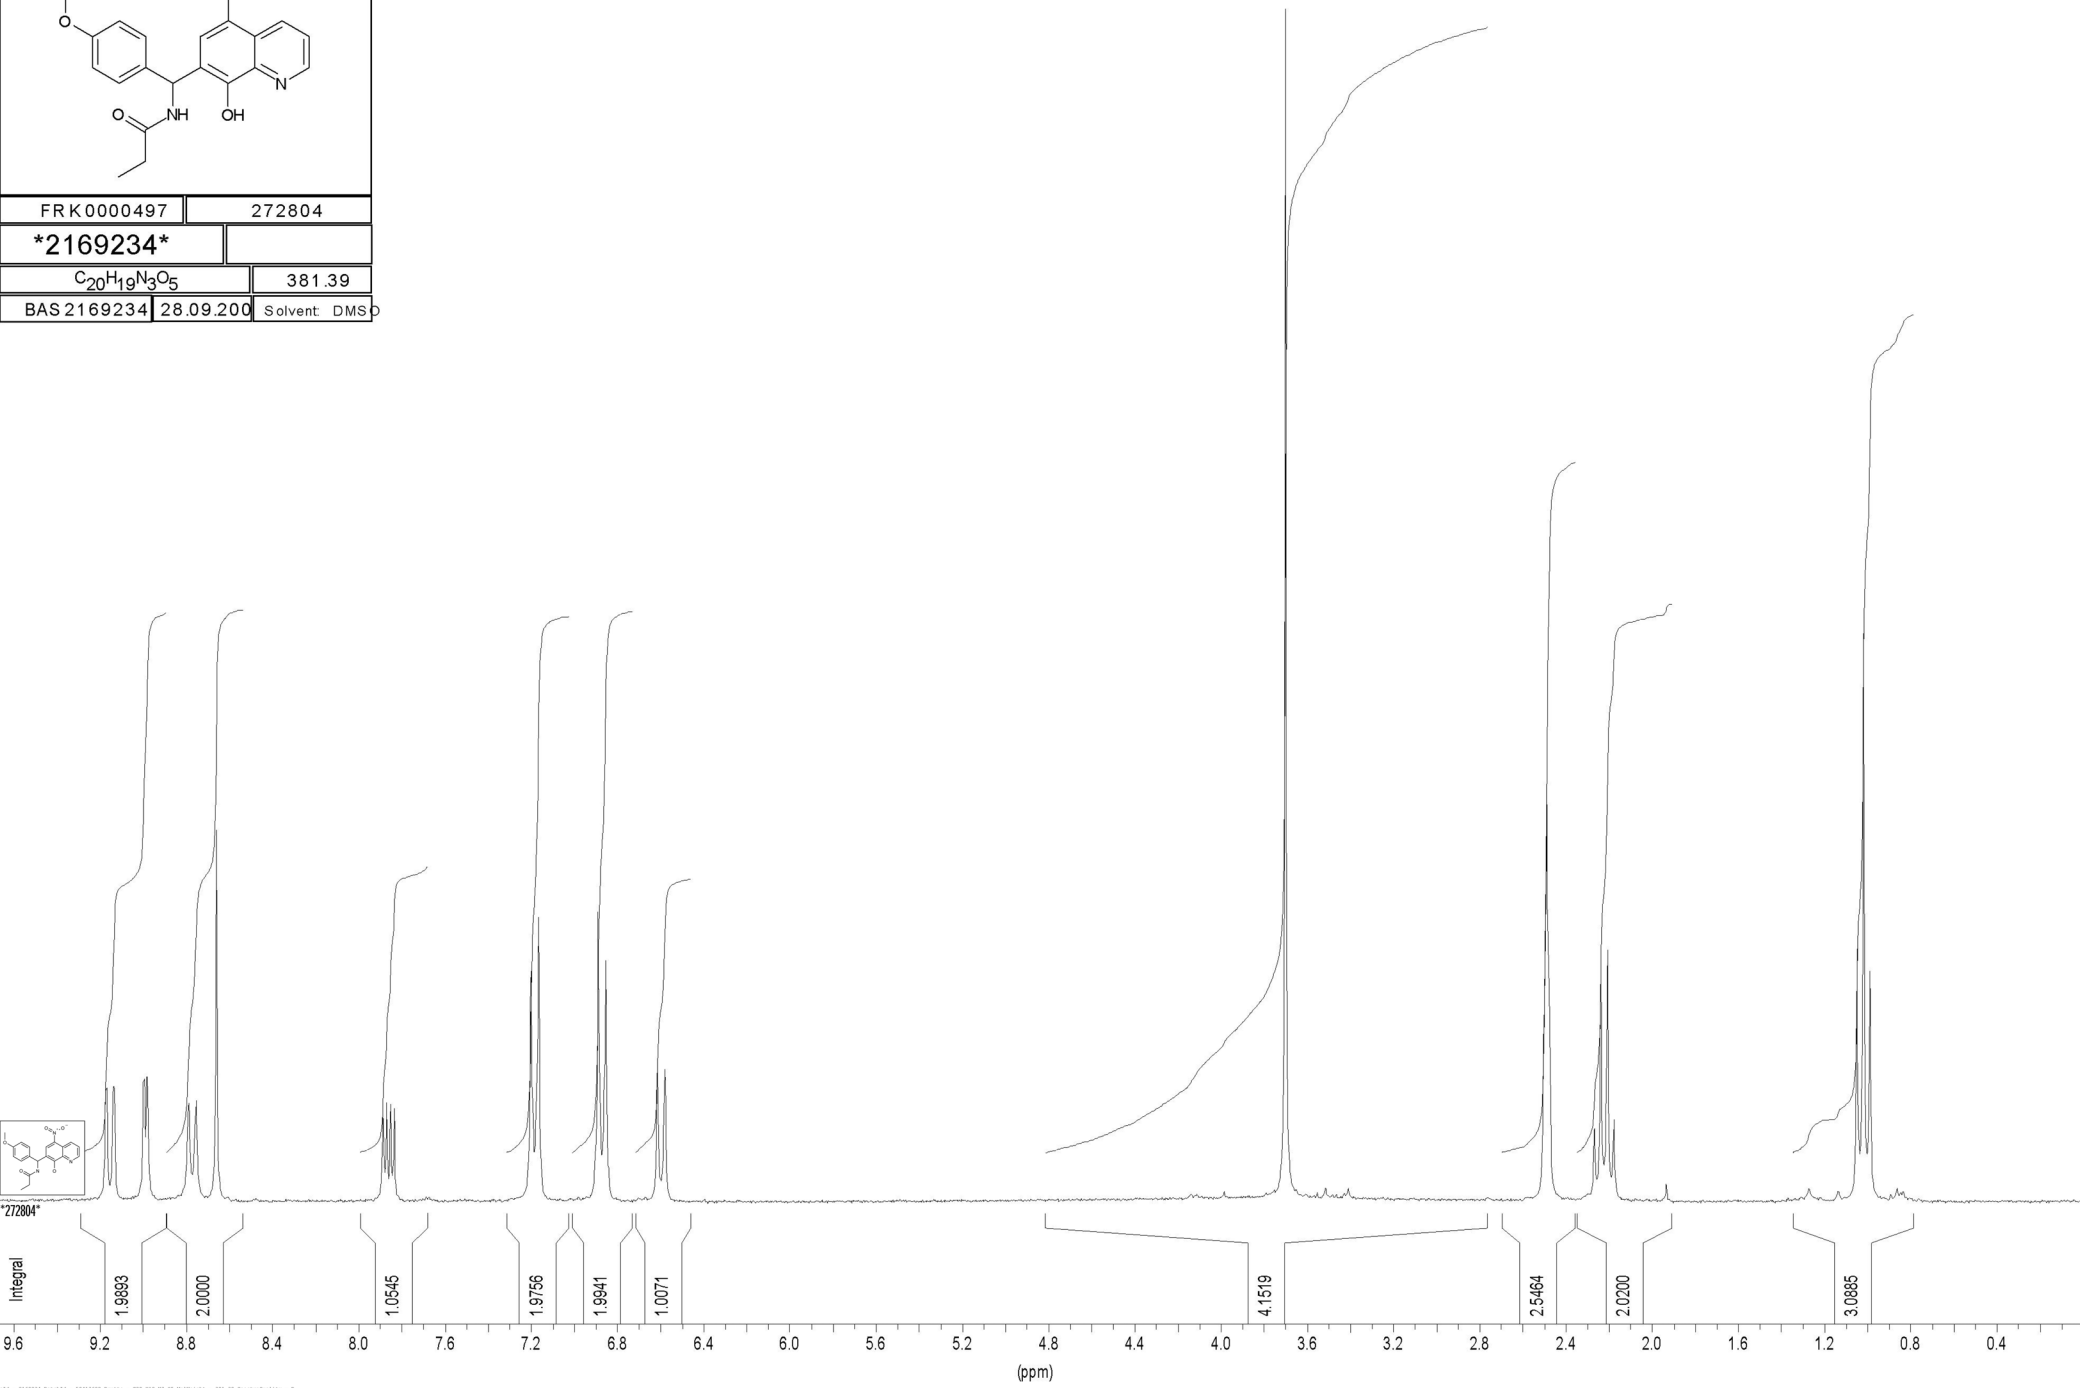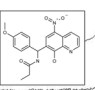

\*272804\*

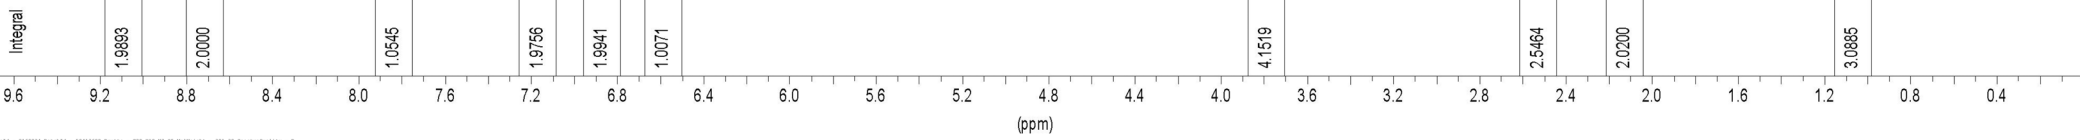



NKTA B1923170

Q1-5

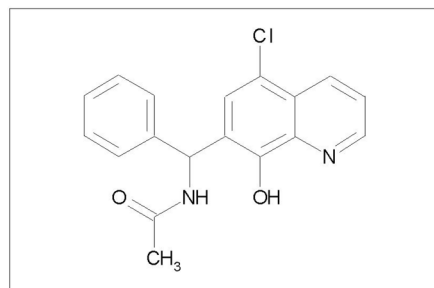

FRK 0000365

\*1923170\*

C<sub>18</sub>H<sub>15</sub>ClN<sub>2</sub>O<sub>2</sub>

326.7855

BAS 1923170

27.01.2000

Solv. DMSO

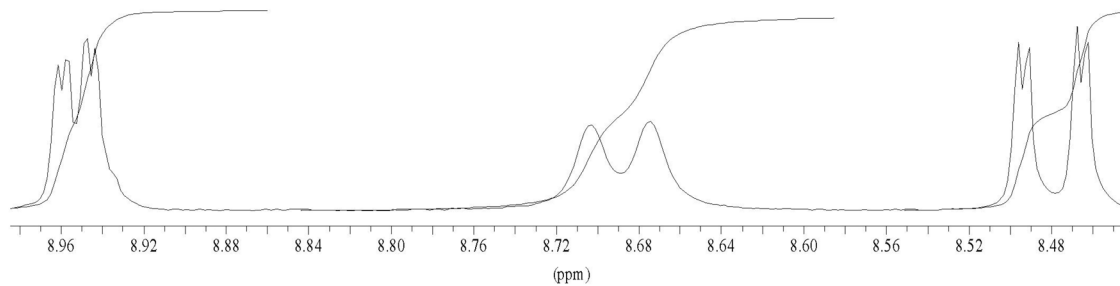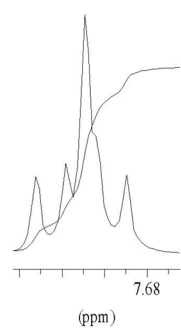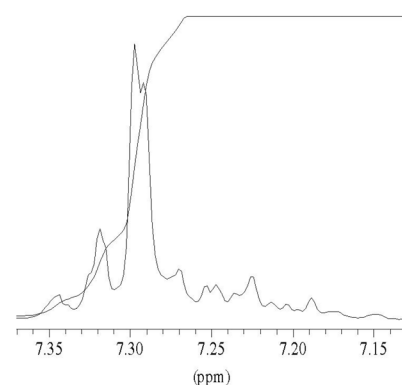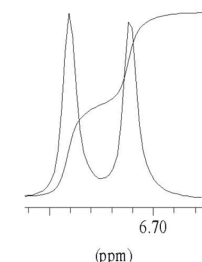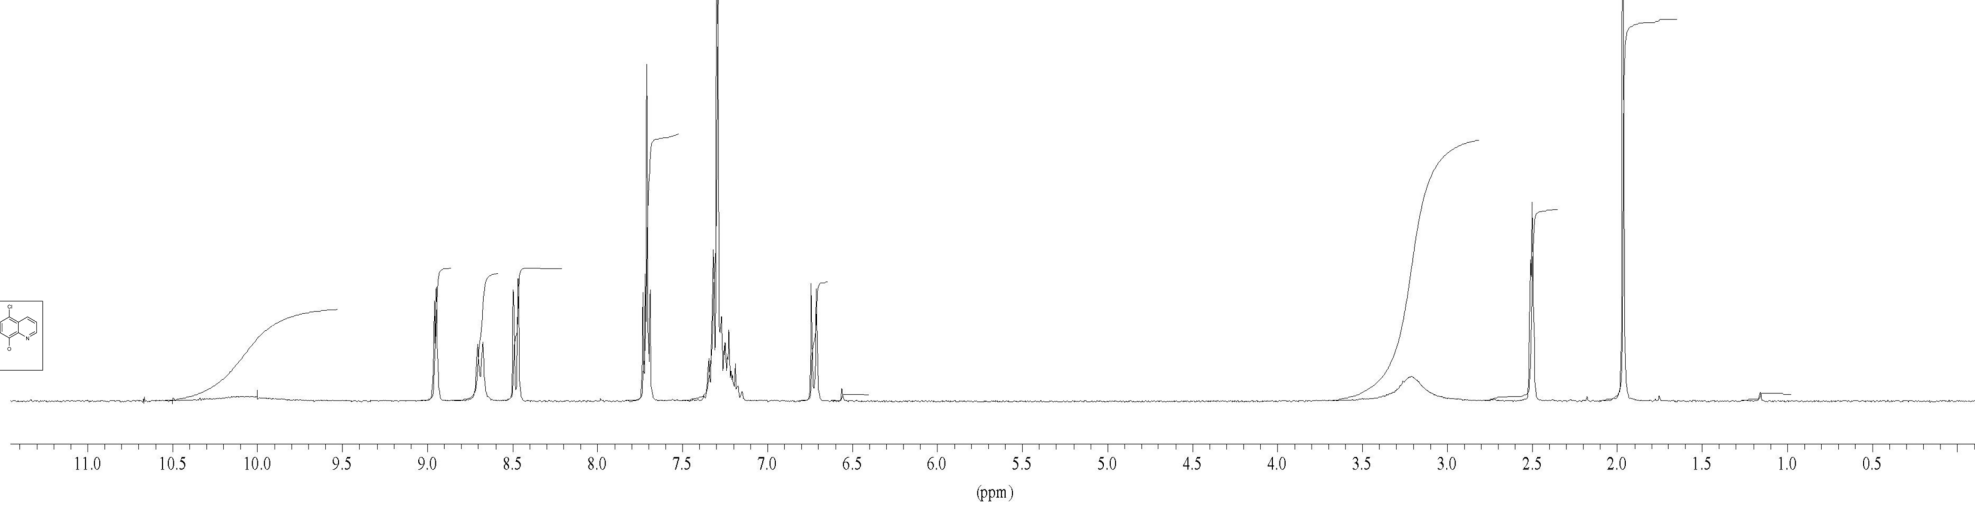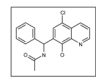

\*229046\*

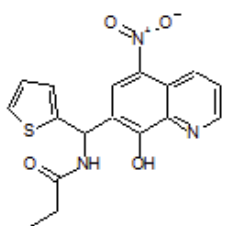

Q1-6

|                                                                 |                          |
|-----------------------------------------------------------------|--------------------------|
| FRK 0000503                                                     | 247432                   |
| <b>*2169240*</b>                                                |                          |
| C <sub>17</sub> H <sub>15</sub> N <sub>3</sub> O <sub>4</sub> S | 357.39                   |
| BAS 2169240                                                     | 12.05.2000 Solvent: DMSO |

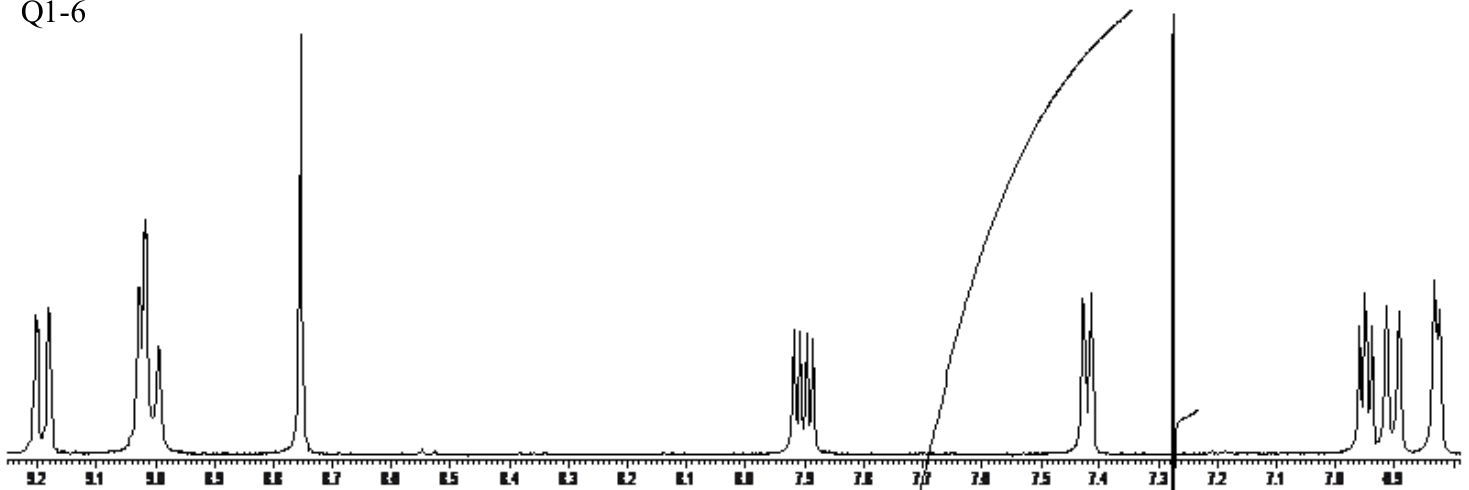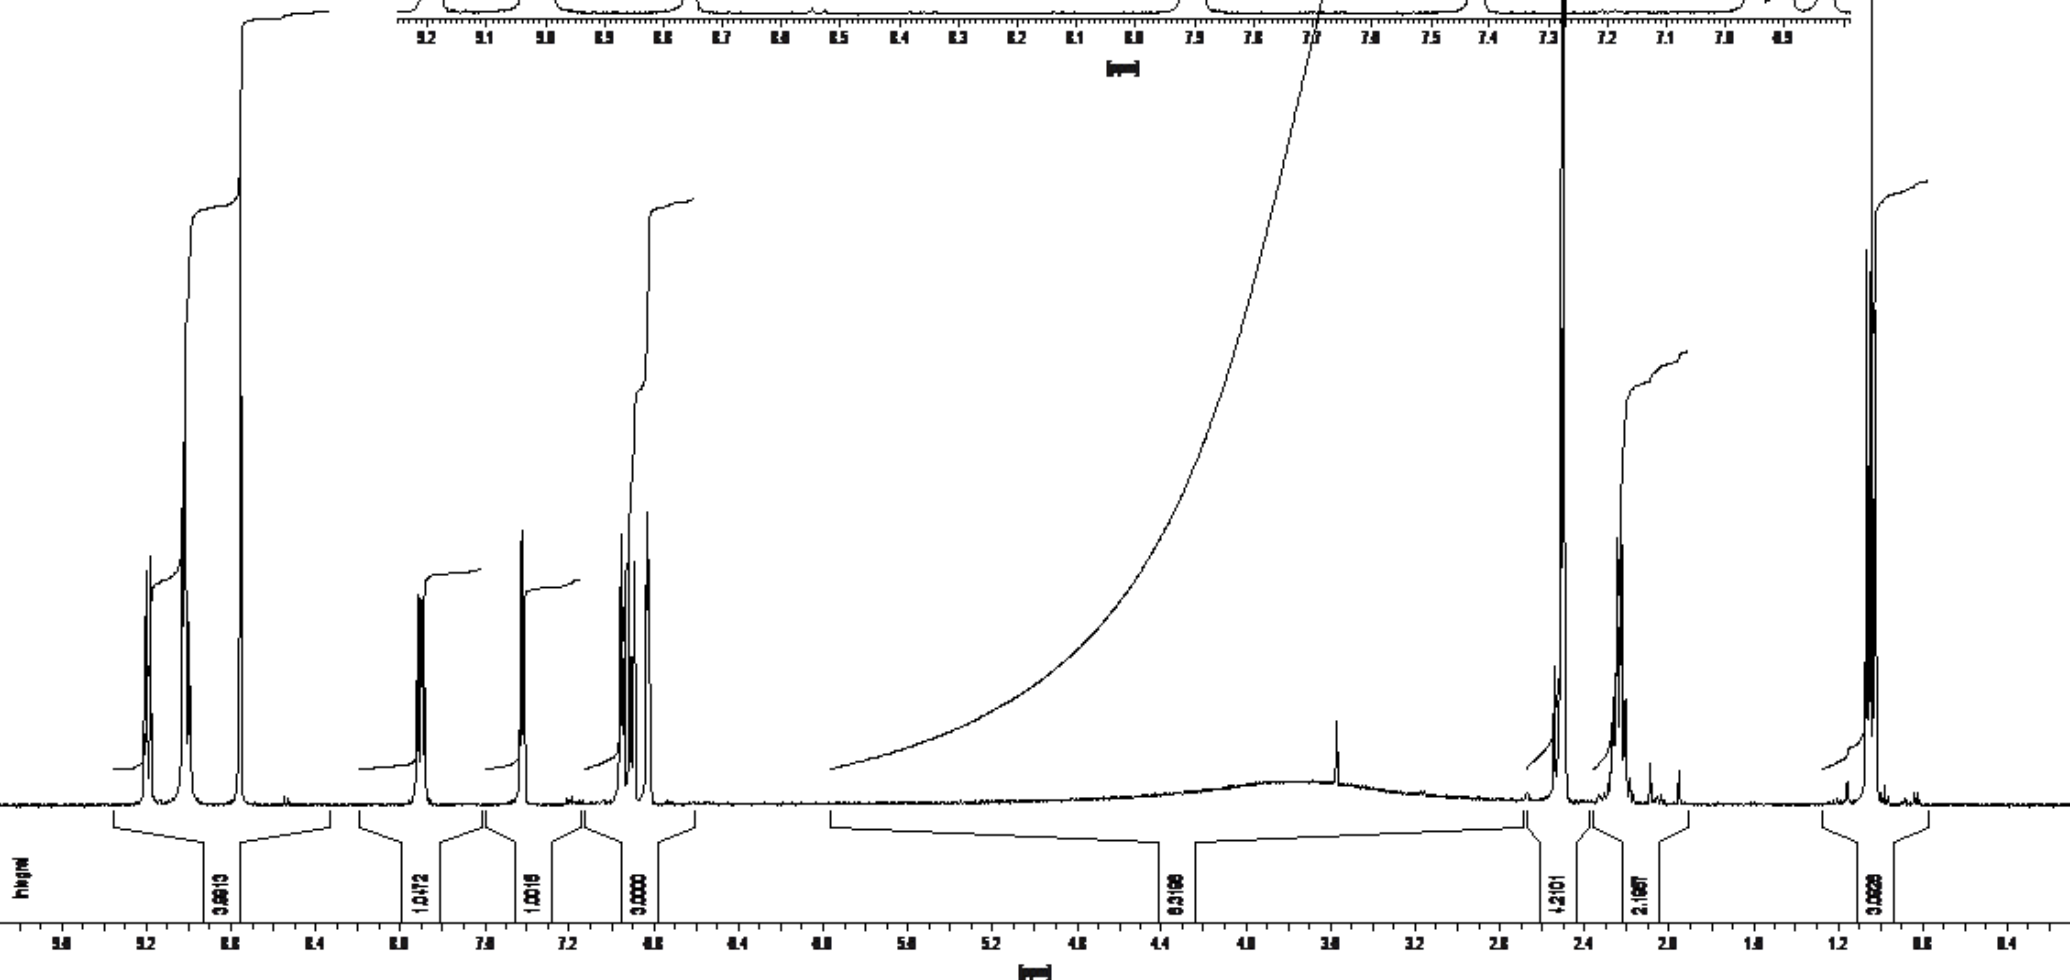

Integration values: 0.0019, 1.0172, 1.0016, 0.0000, 0.0160, 4.2101, 2.1607, 0.0020

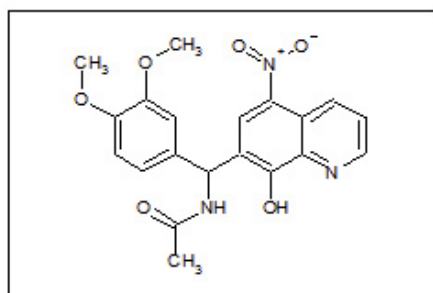

FRK 0000400

\*1923205\*

 $C_{20}H_{19}N_3O_6$ 

397.3909

BAS 1923205

27.01.2000

Solv.DMSO

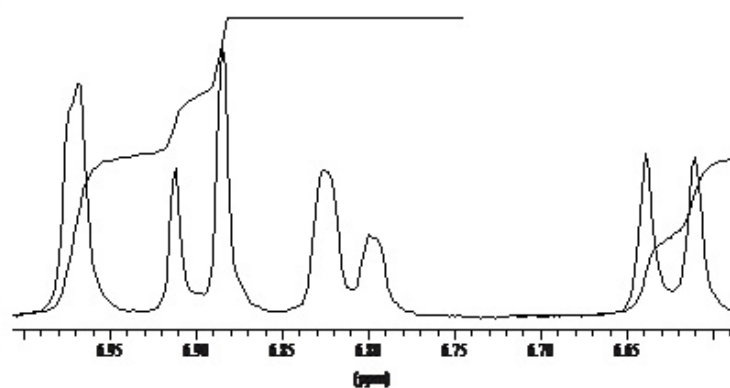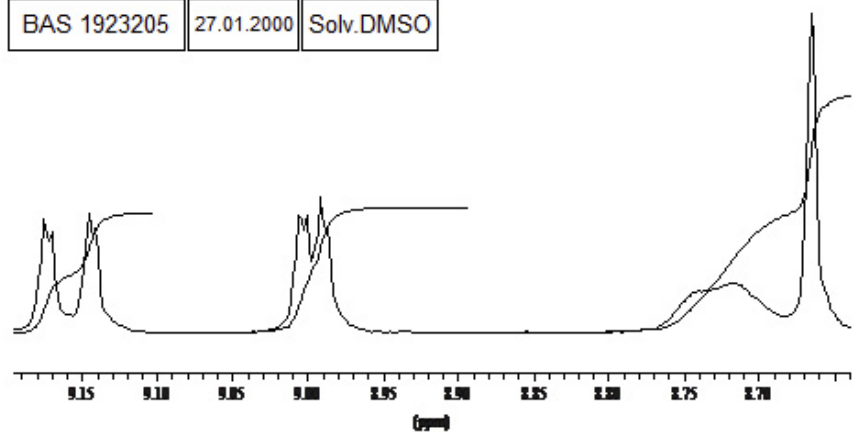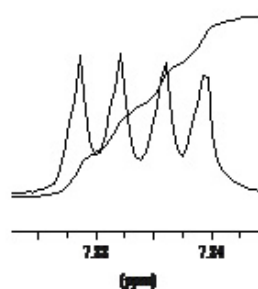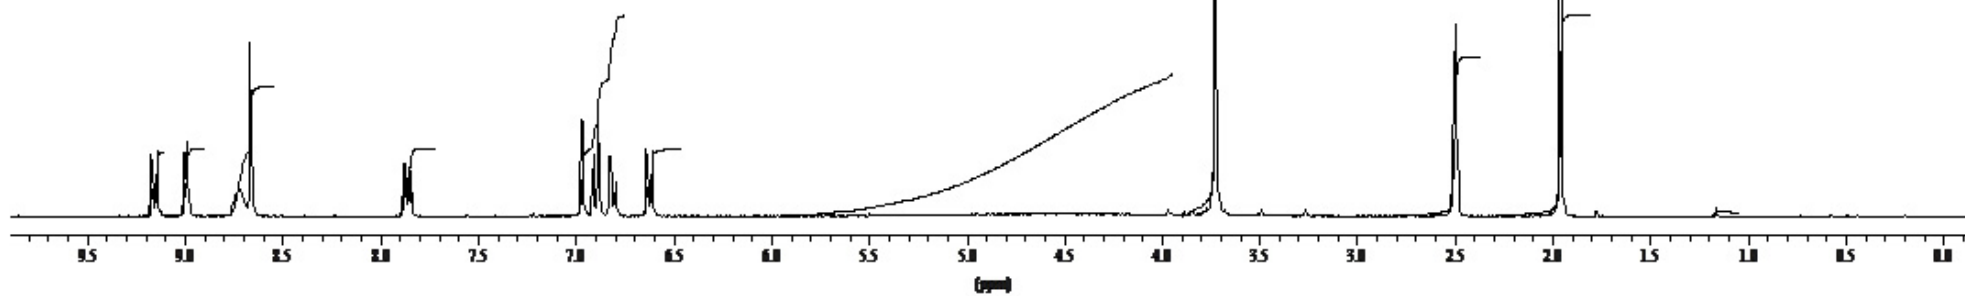

NKTA B1923185

Q1-8

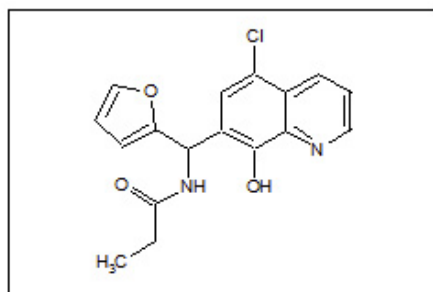

|                                                                 |                      |
|-----------------------------------------------------------------|----------------------|
| FRK 0000380                                                     |                      |
| *1923185*                                                       |                      |
| C <sub>17</sub> H <sub>15</sub> ClN <sub>2</sub> O <sub>3</sub> | 330.7737             |
| BAS 1923185                                                     | 27.01.2000 Solv.DMSO |

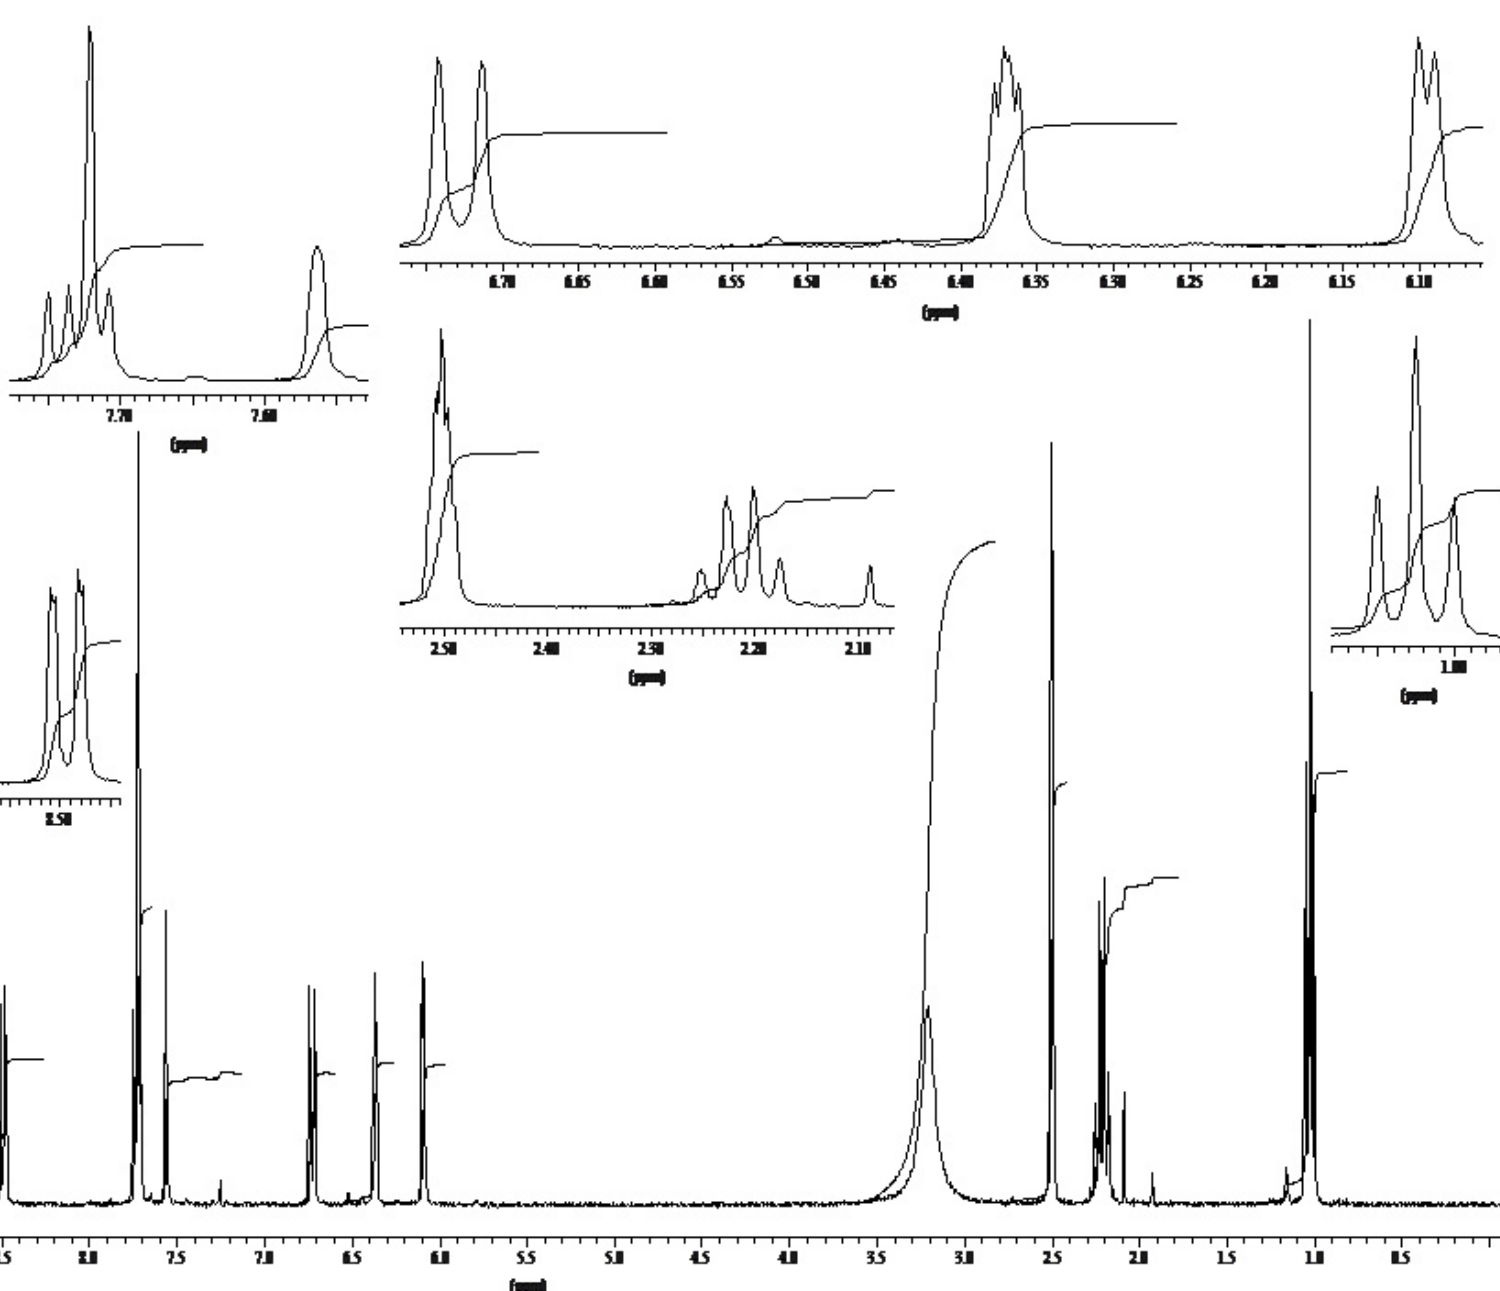

NKTA B1923191

Q1-9

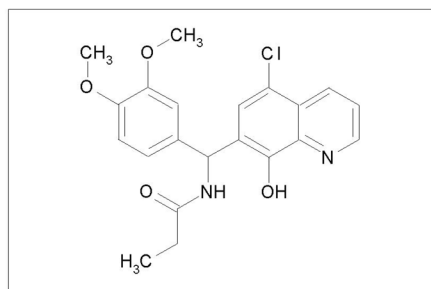

FRK 0000386

\*1923191\*

C<sub>21</sub>H<sub>21</sub>ClN<sub>2</sub>O<sub>4</sub>

400.8655

BAS 1923191

27.01.2000

Solv. DMSO

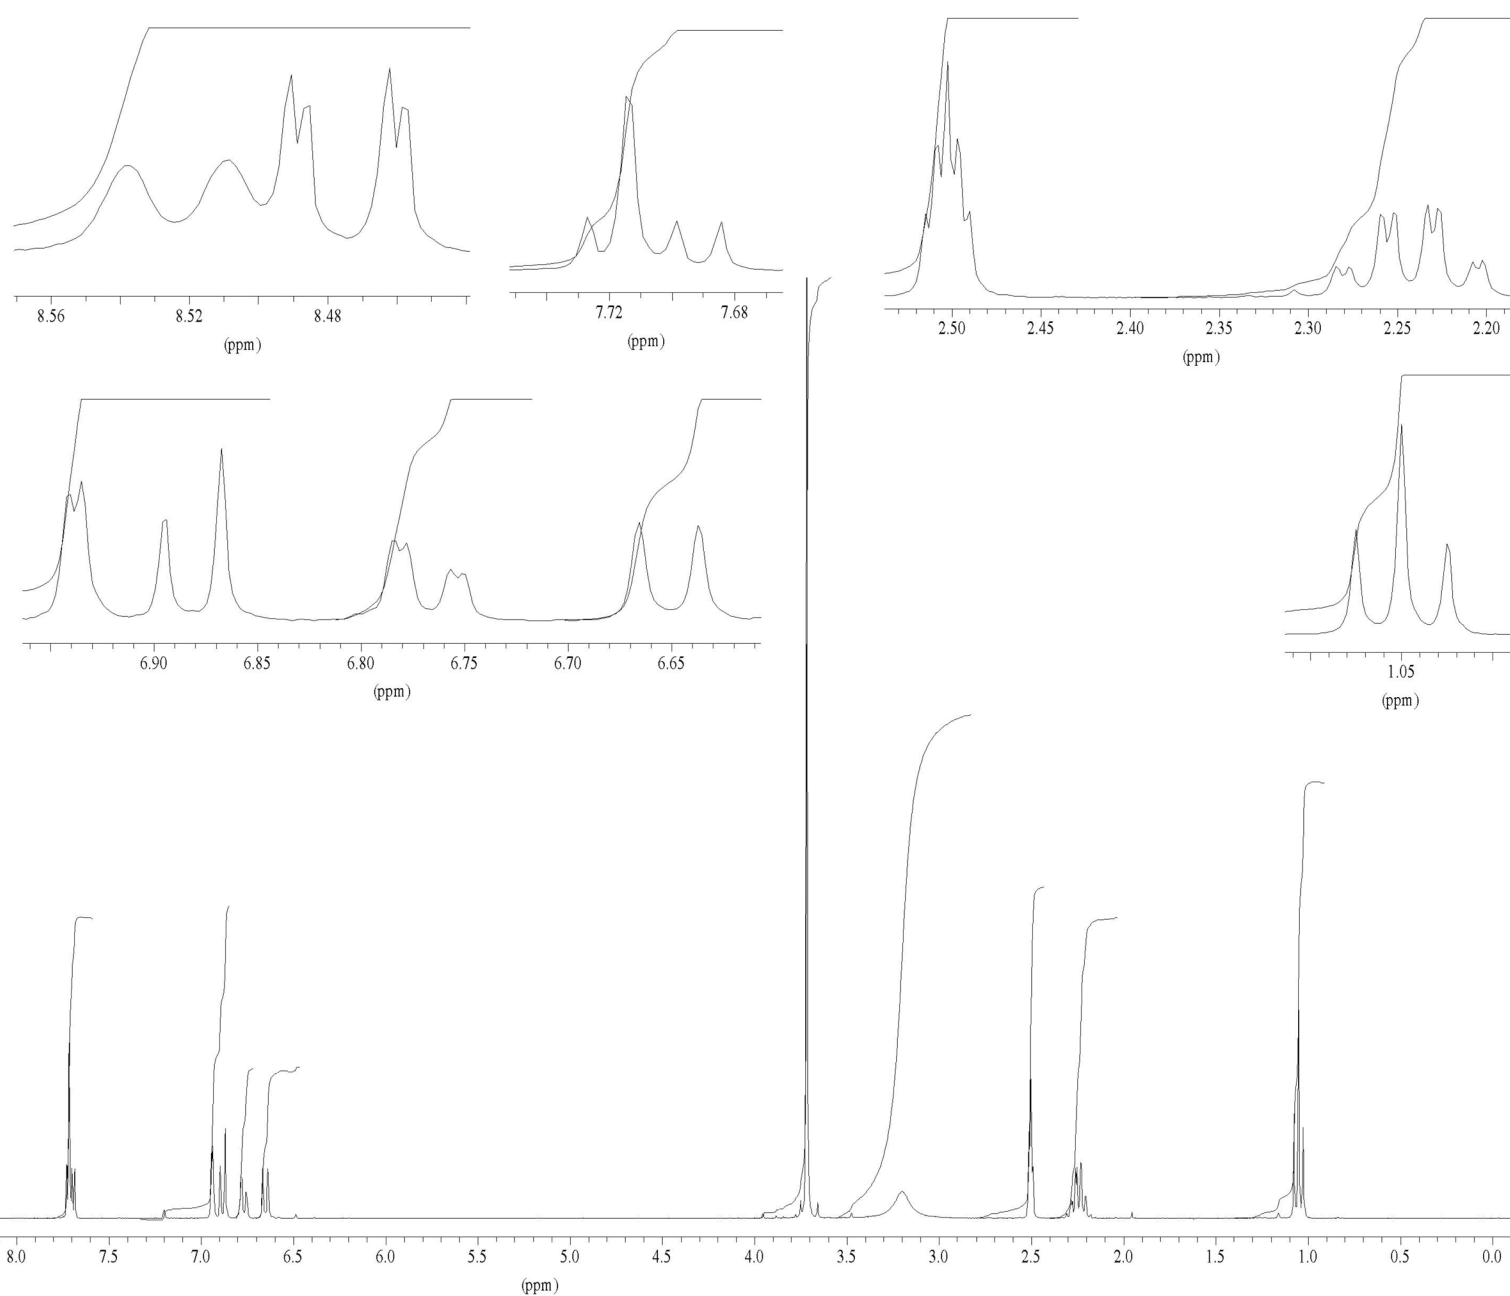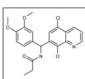

\*229064\*

NKTA B1923172

|                                                                 |            |            |
|-----------------------------------------------------------------|------------|------------|
|                                                                 |            |            |
| FRK 0000367                                                     |            |            |
|                                                                 |            |            |
| C <sub>20</sub> H <sub>20</sub> ClN <sub>3</sub> O <sub>2</sub> | 369.8543   |            |
| BAS 1923172                                                     | 27.01.2000 | Solv. DMSO |

Q1-10

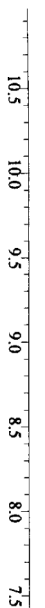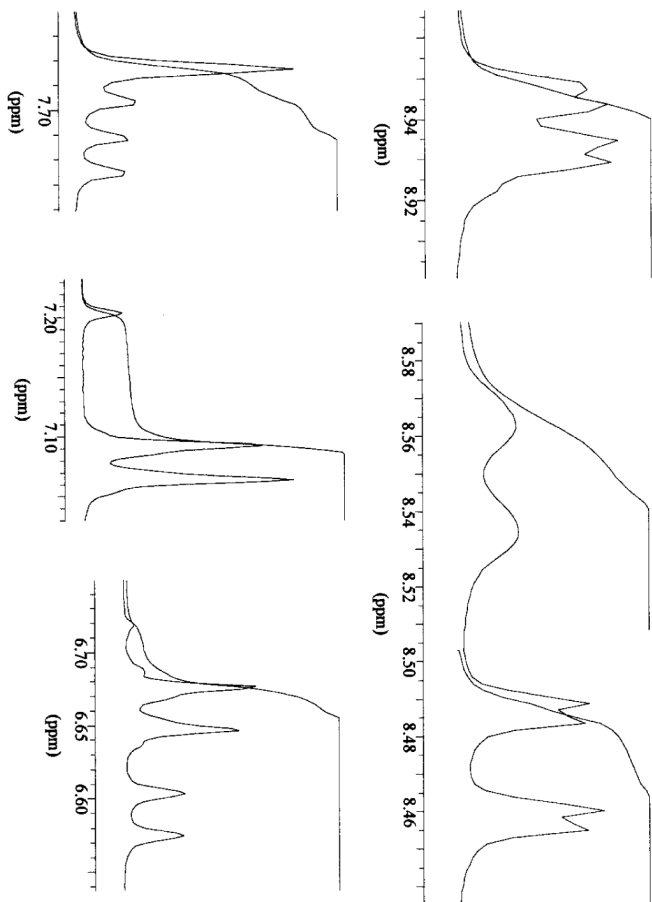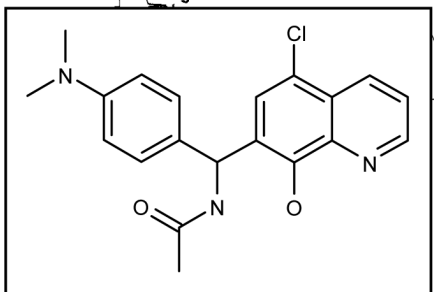

(ppm)

\*229048\*

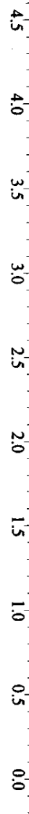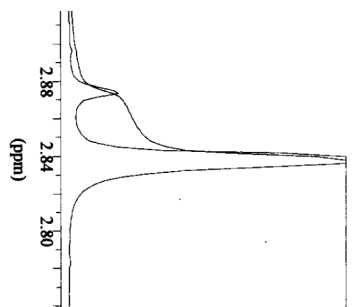

B  
7/10/09/06

Q1-11

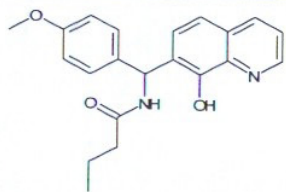

|                                                               |                         |
|---------------------------------------------------------------|-------------------------|
| FRK 0000018                                                   | 0467113                 |
| *1277878*                                                     |                         |
| C <sub>21</sub> H <sub>22</sub> N <sub>2</sub> O <sub>3</sub> | 350.42                  |
| BAS 1277878                                                   | 01.11.200 Solvent: DMSO |

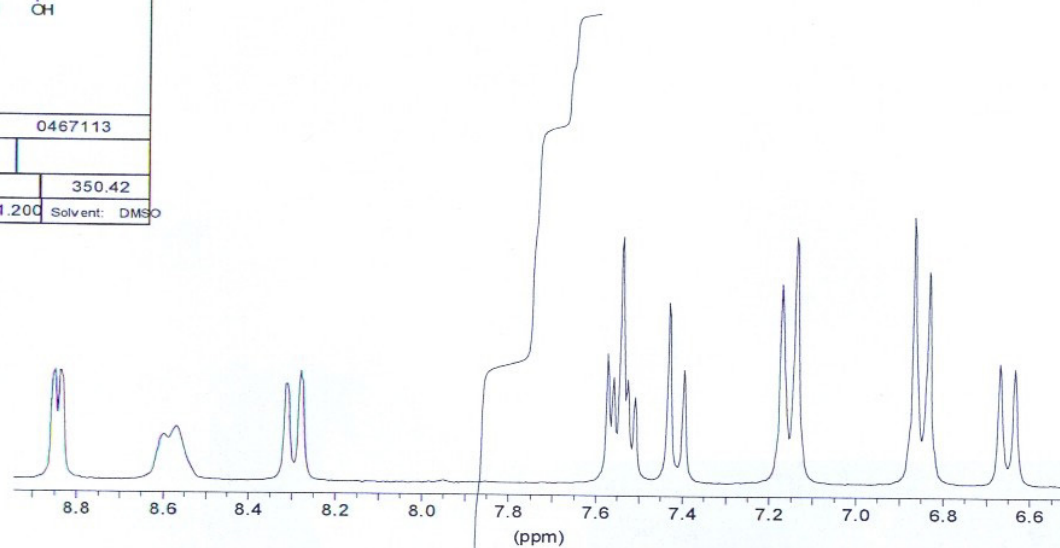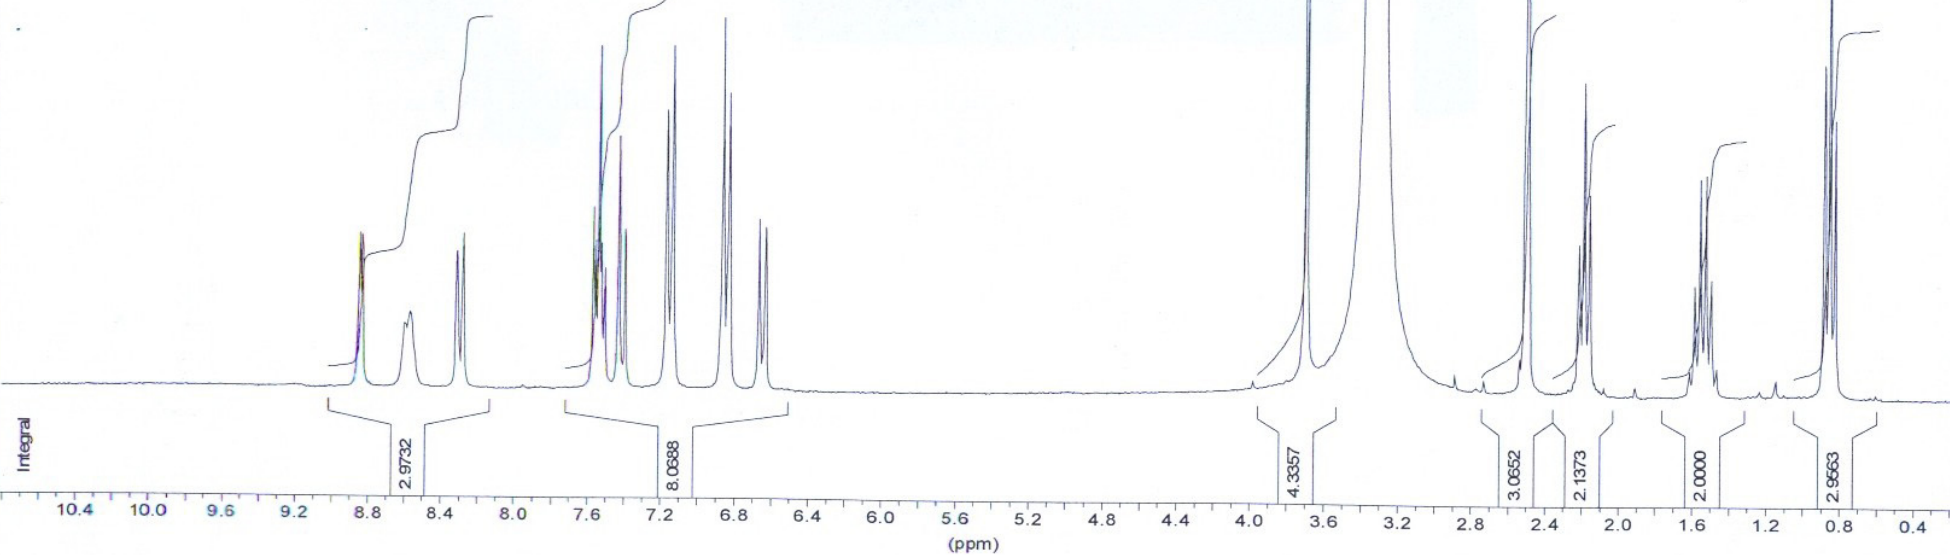

T0510-2459 Q1-12

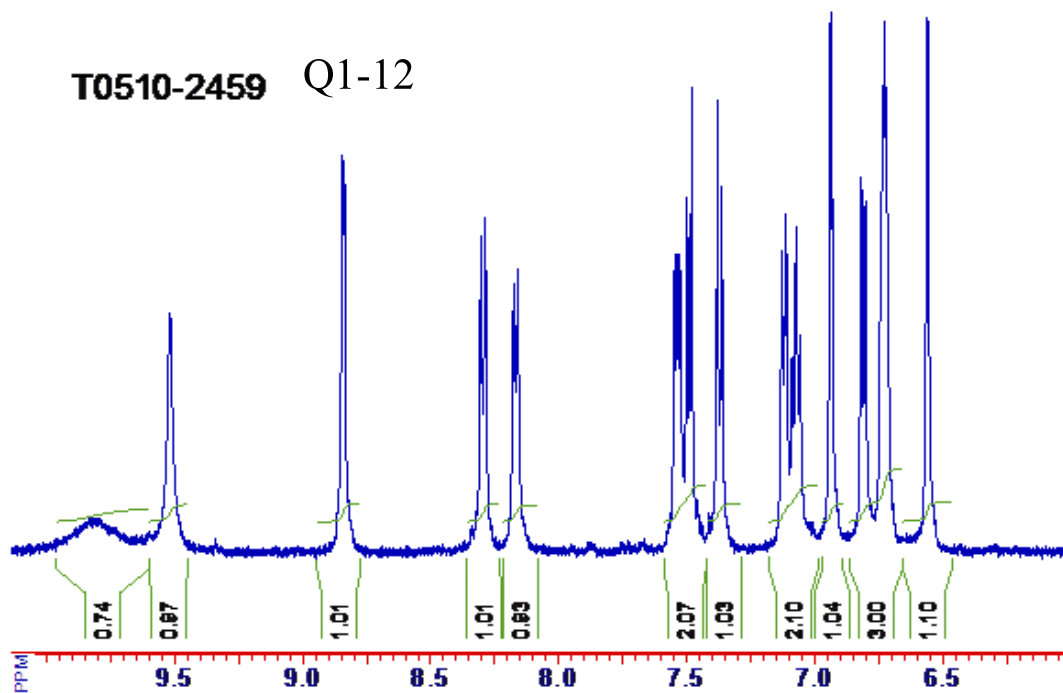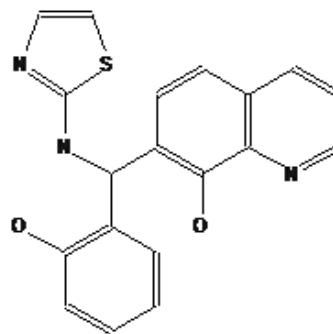

T0510-2459 Kovina-K-2 C19H15N3O2S  
349.41

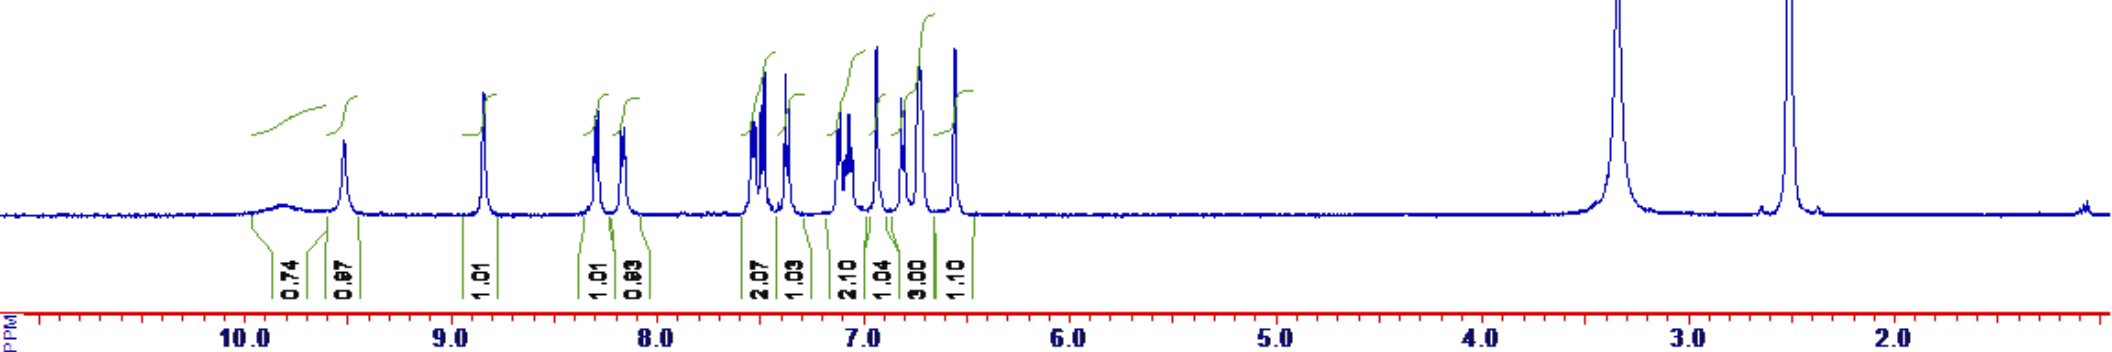

|                       |                    |                  |         |                            |                     |
|-----------------------|--------------------|------------------|---------|----------------------------|---------------------|
| File name: T0510-2459 | Vaskivska Lyudmila | SF: 500.0680 MHz | MSC: 1  | PW: 0.00 usec, RG: 200     | St 65536            |
| Date: 18-Jan-2013     | Solvent: DMSO      | SW: 8503 Hz      | TE: 0 K | AQ: 1.93 sec, RD: 0.00 sec | <b>*T0510-2459*</b> |



BAS 7529531

Q2-1

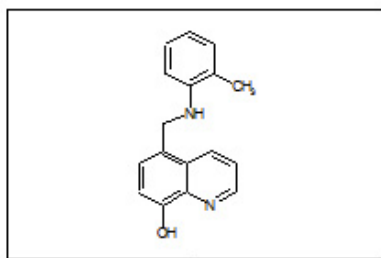

|                                                  |           |
|--------------------------------------------------|-----------|
| YAP 0000072                                      |           |
| *7529531*                                        |           |
| C <sub>17</sub> H <sub>16</sub> N <sub>2</sub> O | 264.3299  |
| BAS 7529531                                      | 0501923   |
| 28.06.2003                                       | Solv.DMSO |

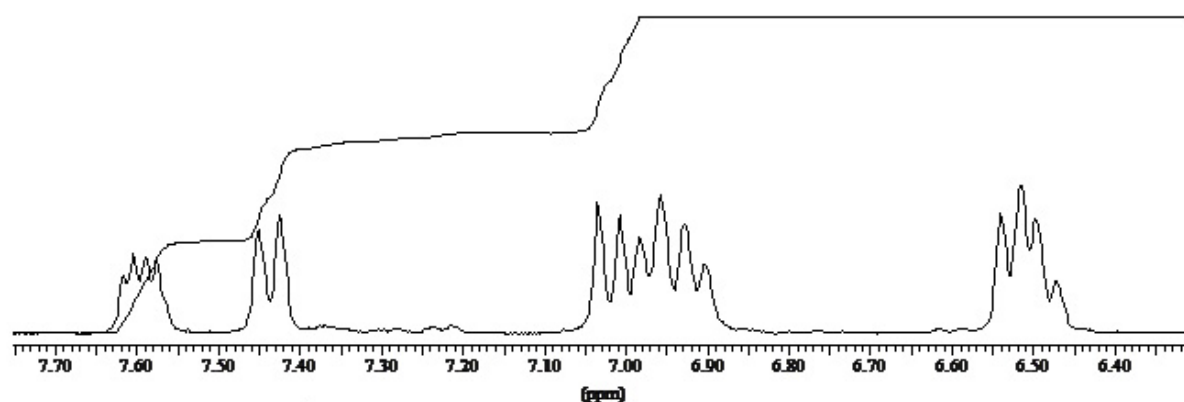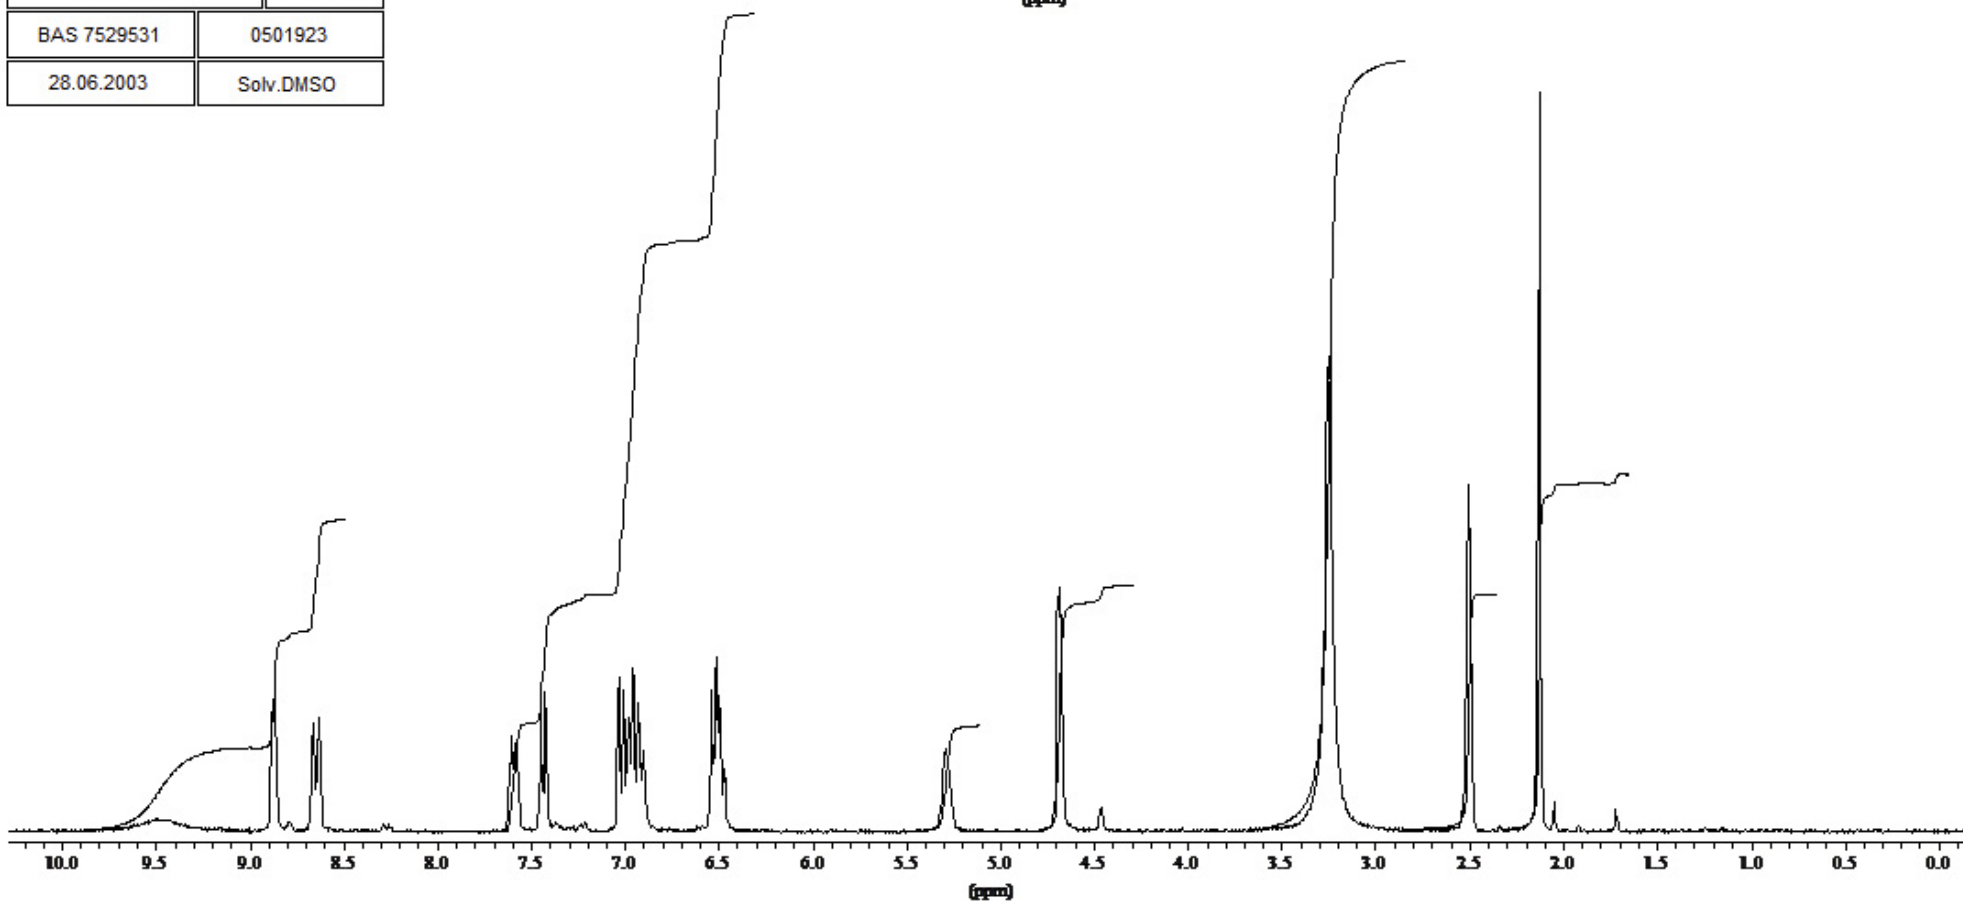

Q2-2

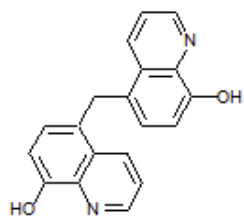

RRP 0002070 0528953

\*6575110\*

C<sub>19</sub>H<sub>14</sub>N<sub>2</sub>O<sub>2</sub> 302.34

BAS 6575110 16.10.2003 Solvent: DMSO

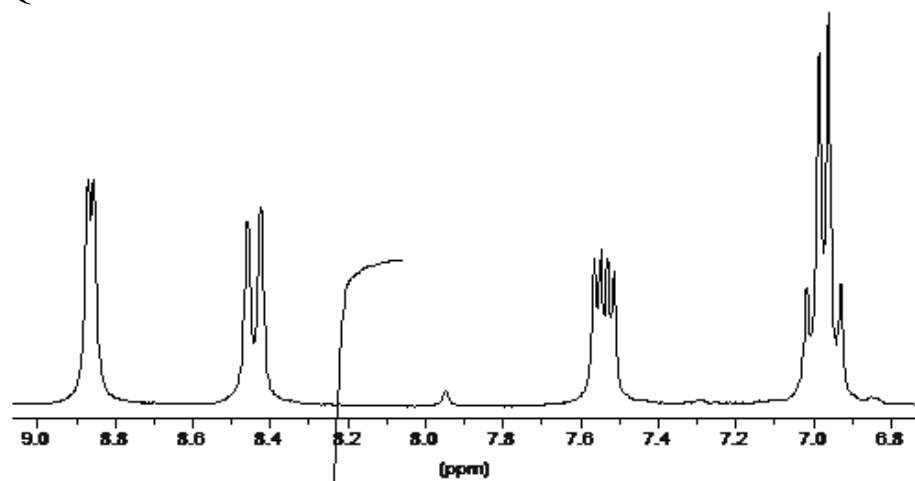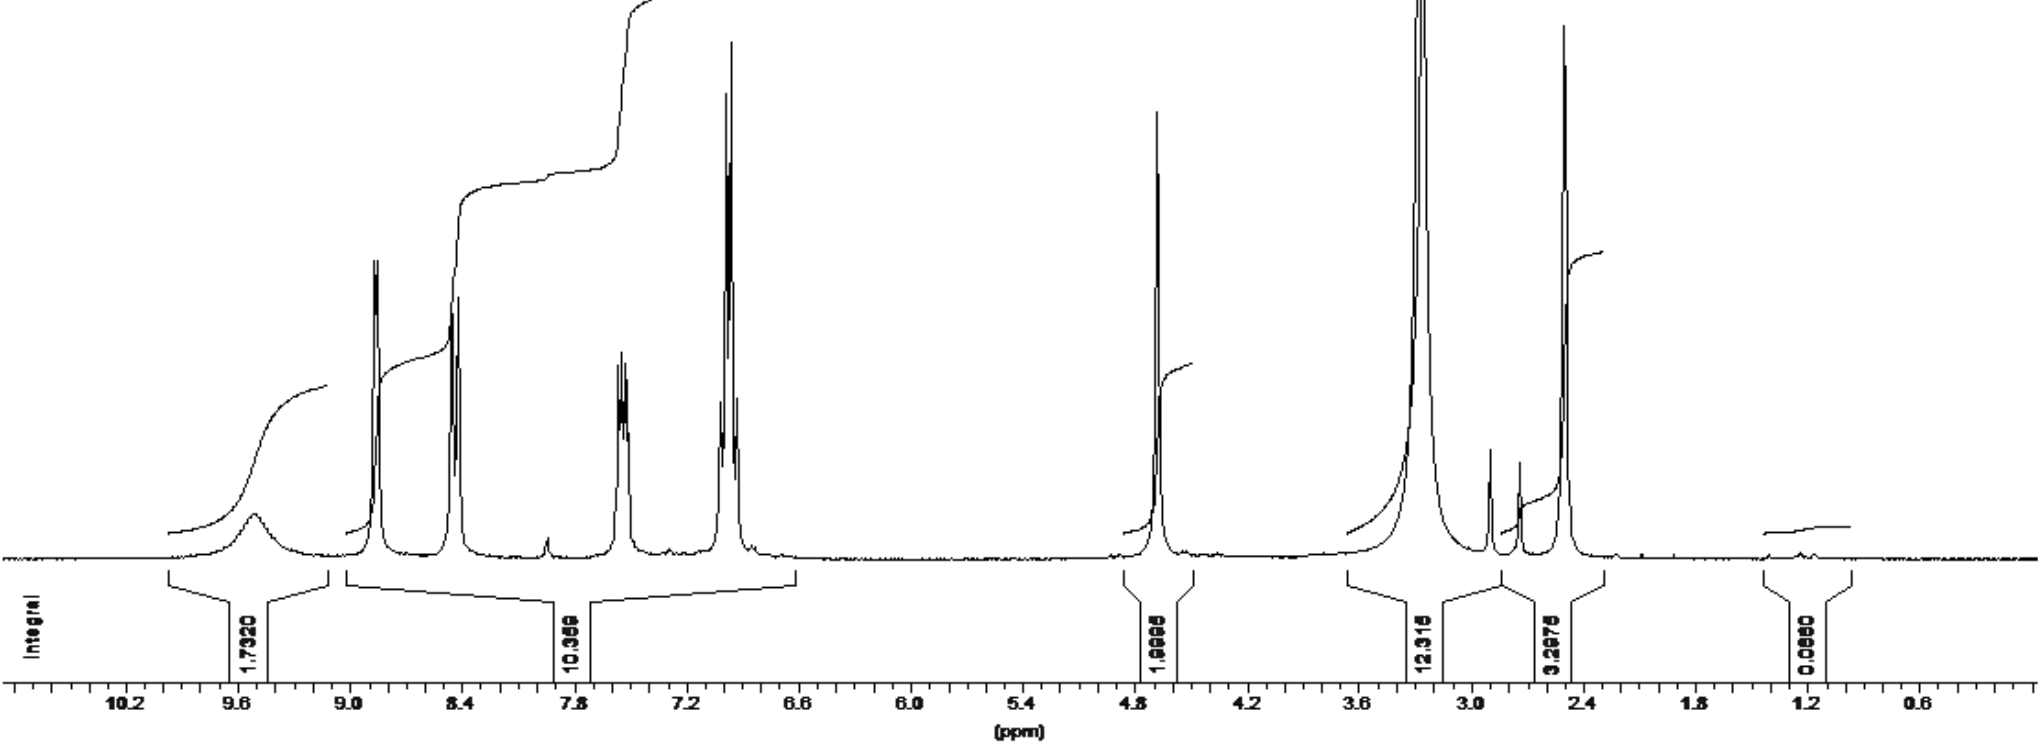

1.7920

10.966

1.0000

12.916

0.2676

0.0000

B 7529529 CDCL3

Q2-3

|                                                                                   |            |
|-----------------------------------------------------------------------------------|------------|
| 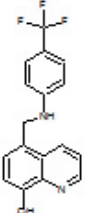 |            |
| YAP 0000070                                                                       |            |
| *7529529*                                                                         |            |
| $C_{17}H_{13}F_3N_2O$                                                             | 318.3012   |
| BAS 7529529                                                                       | 0531460    |
| 01.11.2003                                                                        | Solv.CDCl3 |

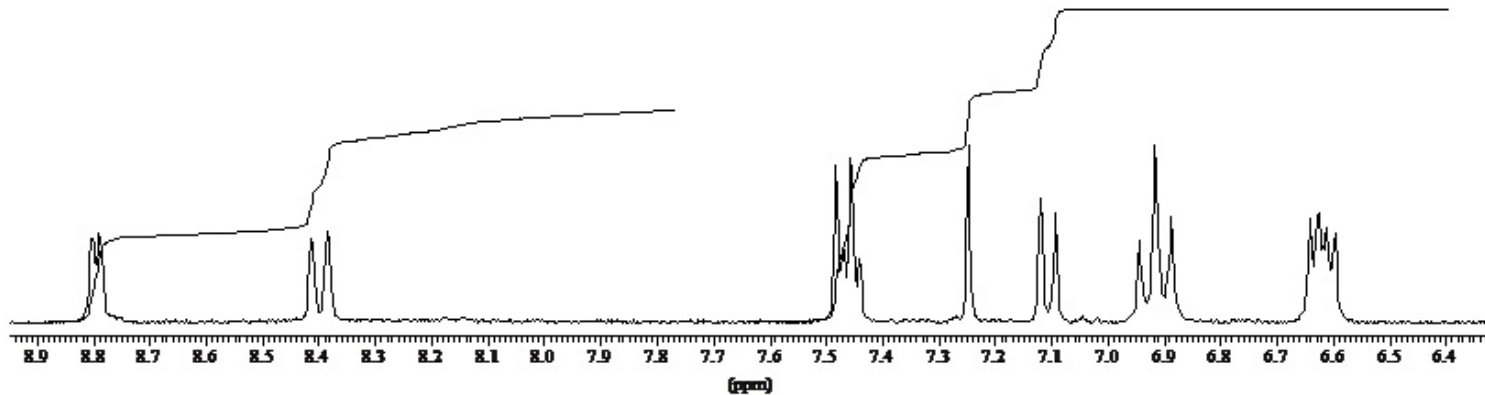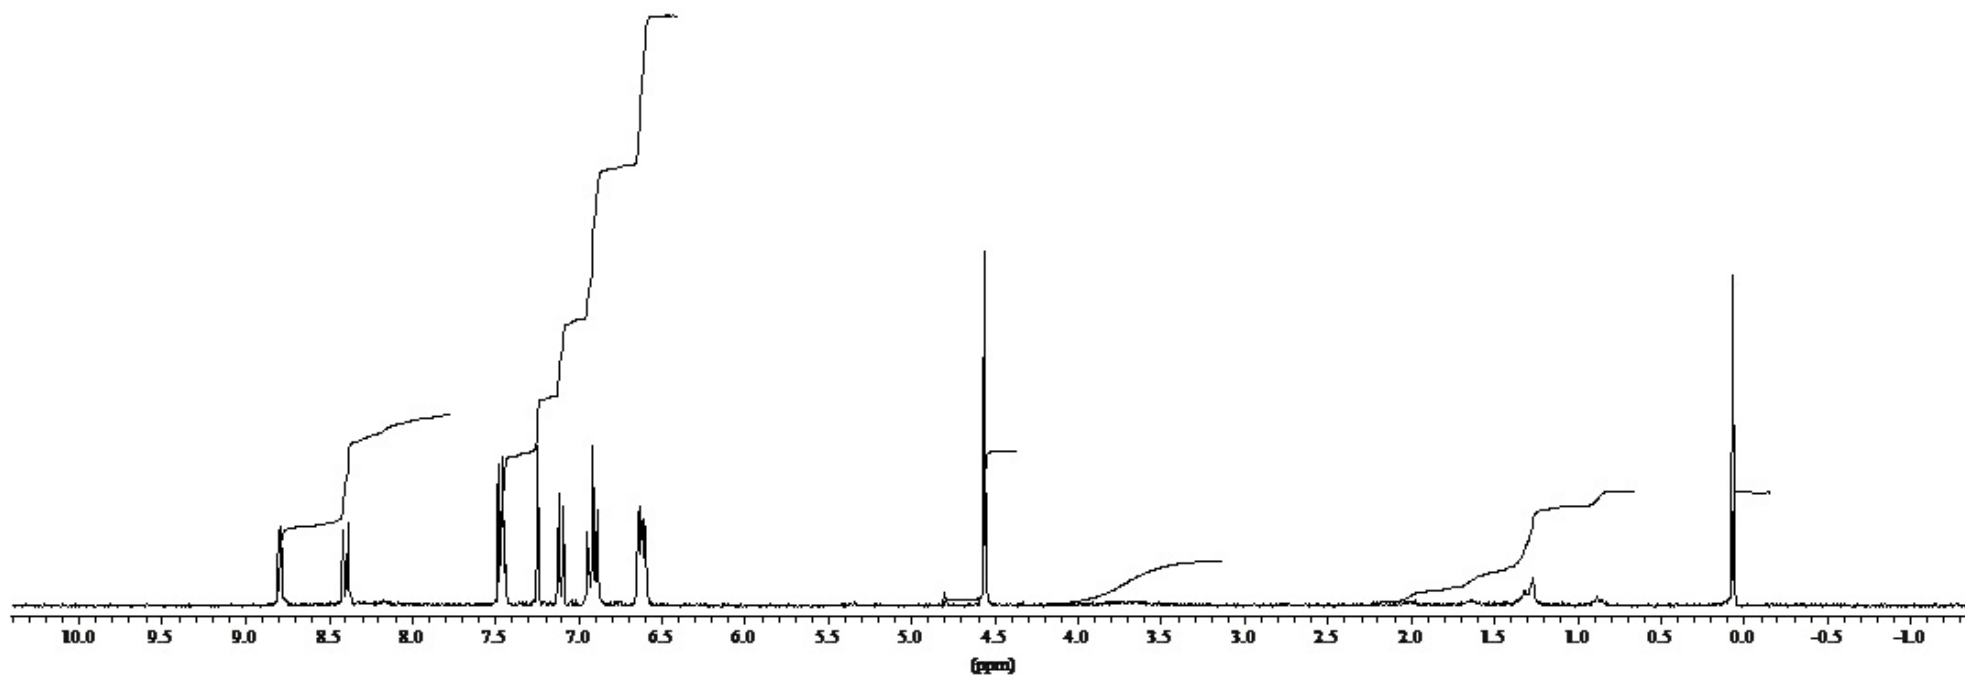

B 7529564 CDCl3

Q2-4

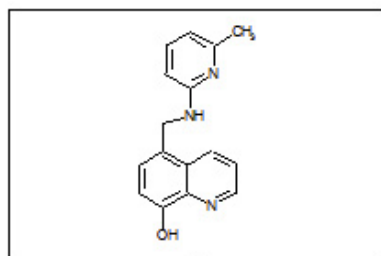

YAP 0000105

\*7529564\*

C<sub>16</sub>H<sub>15</sub>N<sub>3</sub>O

265.3175

BAS 7529564

0531463

01.11.2003

Solv.CDCl3

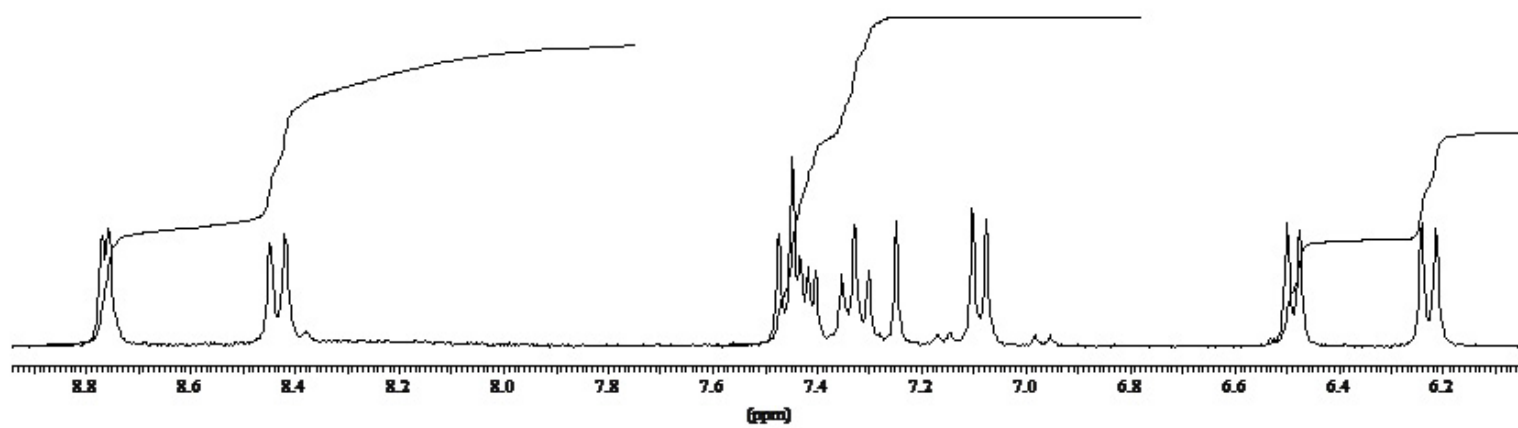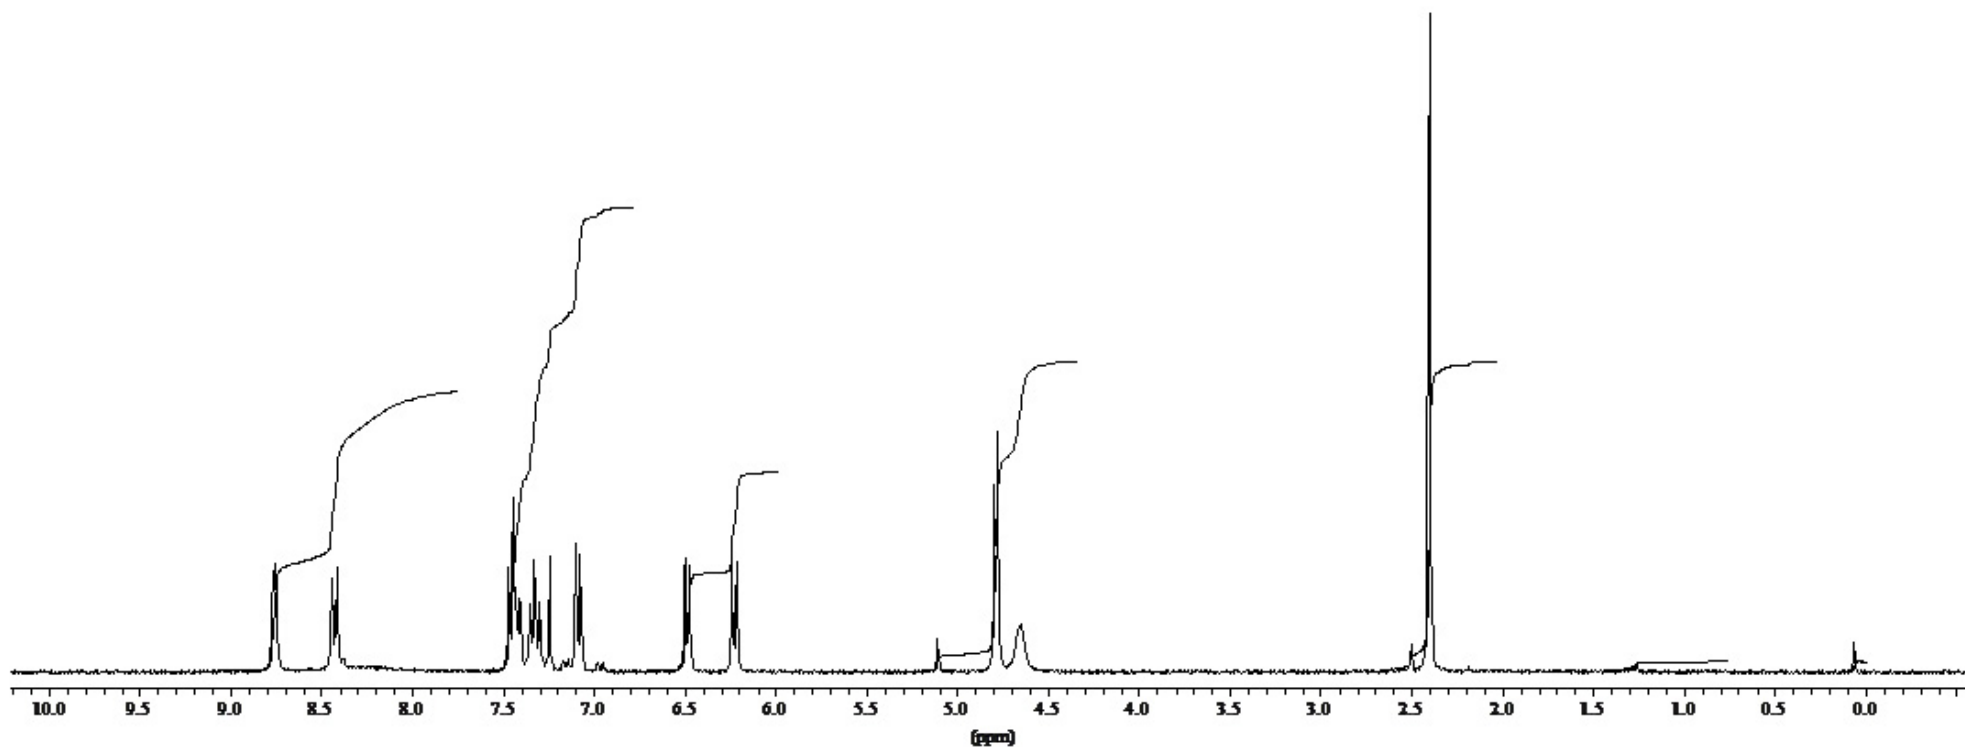

BAS 7529526

Q2-5

|                                                                                   |           |
|-----------------------------------------------------------------------------------|-----------|
| 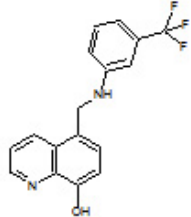 |           |
| YAP 0000067                                                                       |           |
| *7529526*                                                                         |           |
| C <sub>17</sub> H <sub>13</sub> F <sub>3</sub> N <sub>2</sub> O                   | 318.3012  |
| BAS 7529526                                                                       | 0501919   |
| 28.06.2003                                                                        | Solv.DMSO |

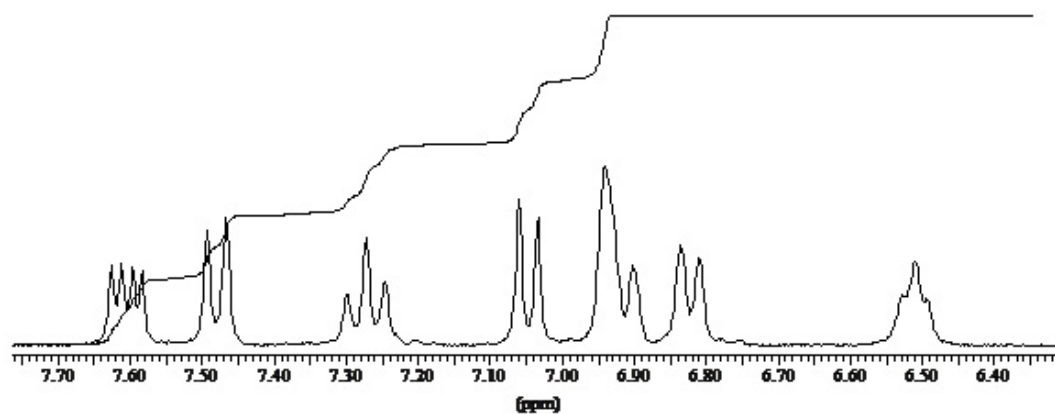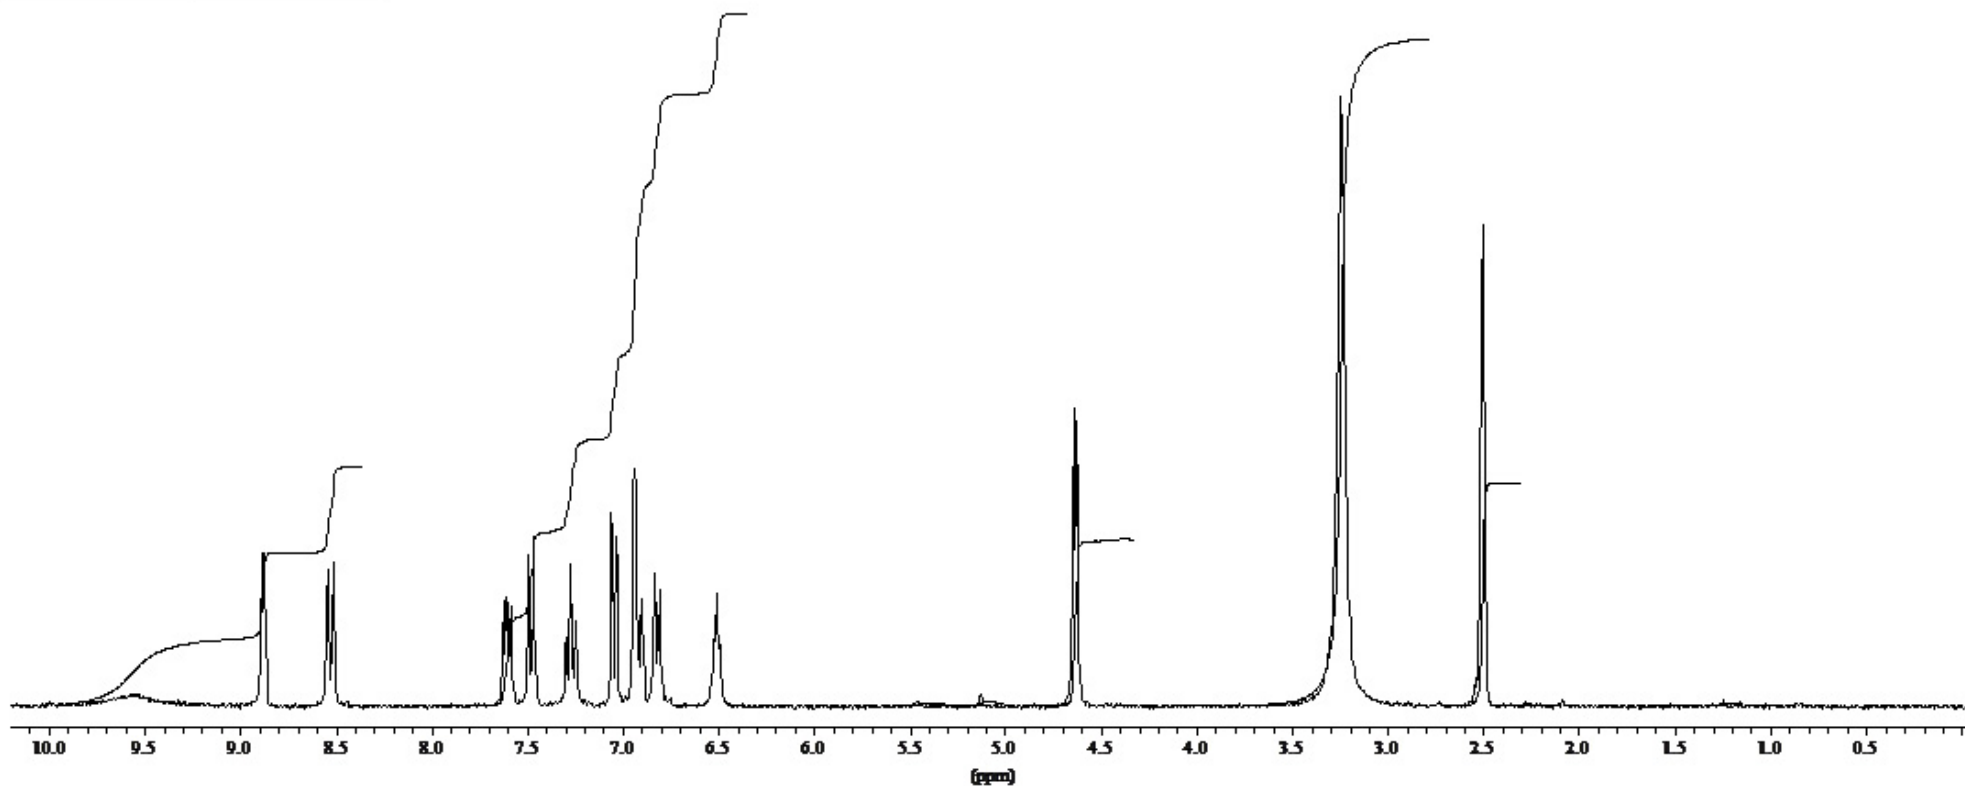

BAS 7529537

Q2-6

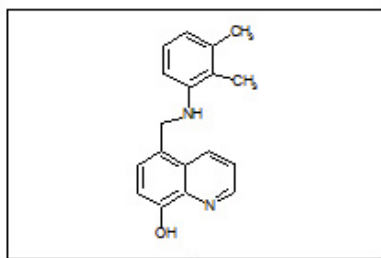

|                                                  |           |
|--------------------------------------------------|-----------|
| YAP 0000078                                      |           |
| *7529537*                                        |           |
| C <sub>18</sub> H <sub>18</sub> N <sub>2</sub> O | 278.3570  |
| BAS 7529537                                      | 0501926   |
| 28.06.2003                                       | Solv.DMSO |

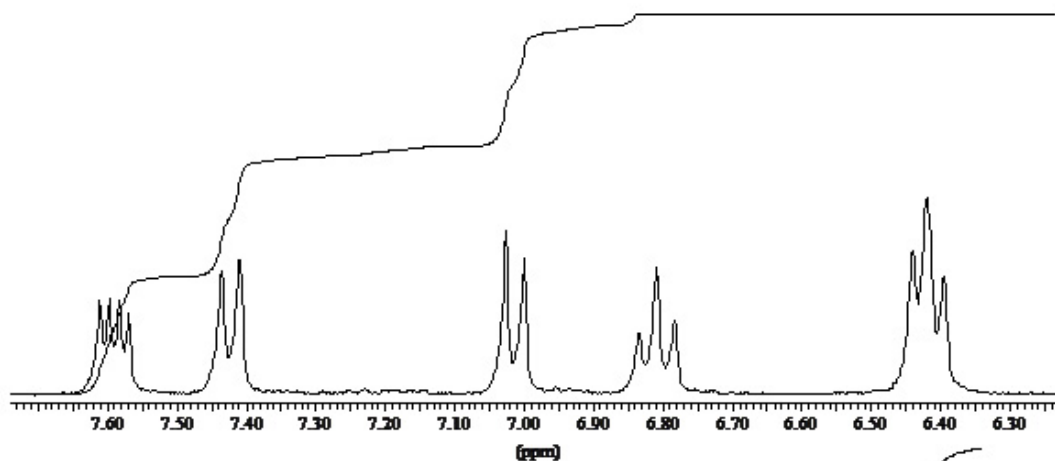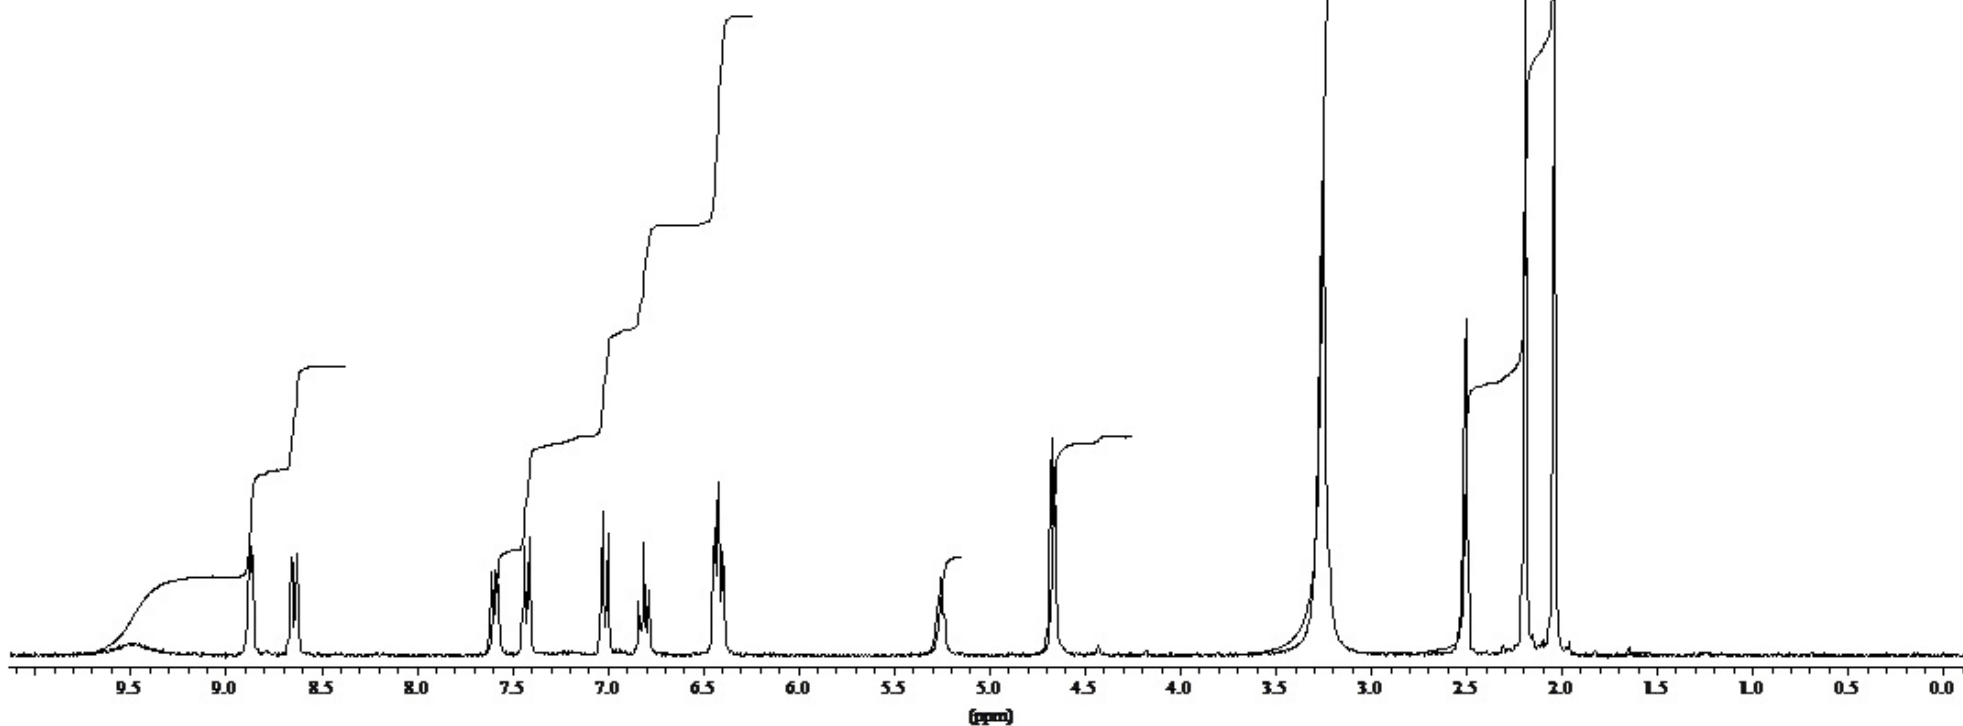

B 7529530 CDCL3

Q2-7

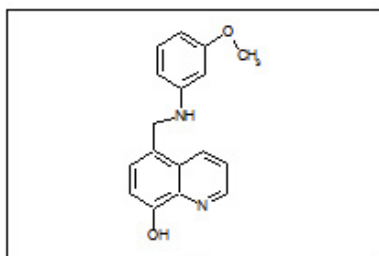

YAP 0000071

\*7529530\*

C<sub>17</sub>H<sub>16</sub>N<sub>2</sub>O<sub>2</sub>

280.3293

BAS 7529530

0531461

01.11.2003

Solv.CDCl3

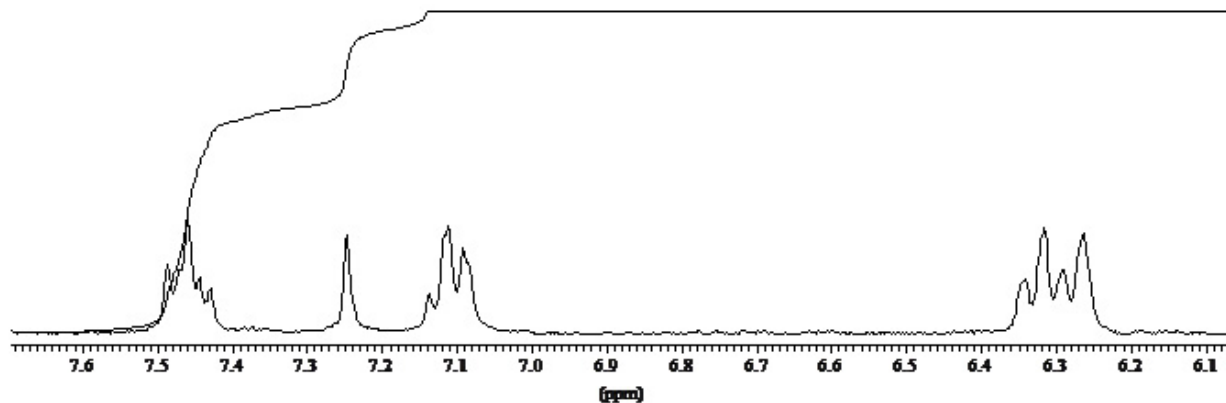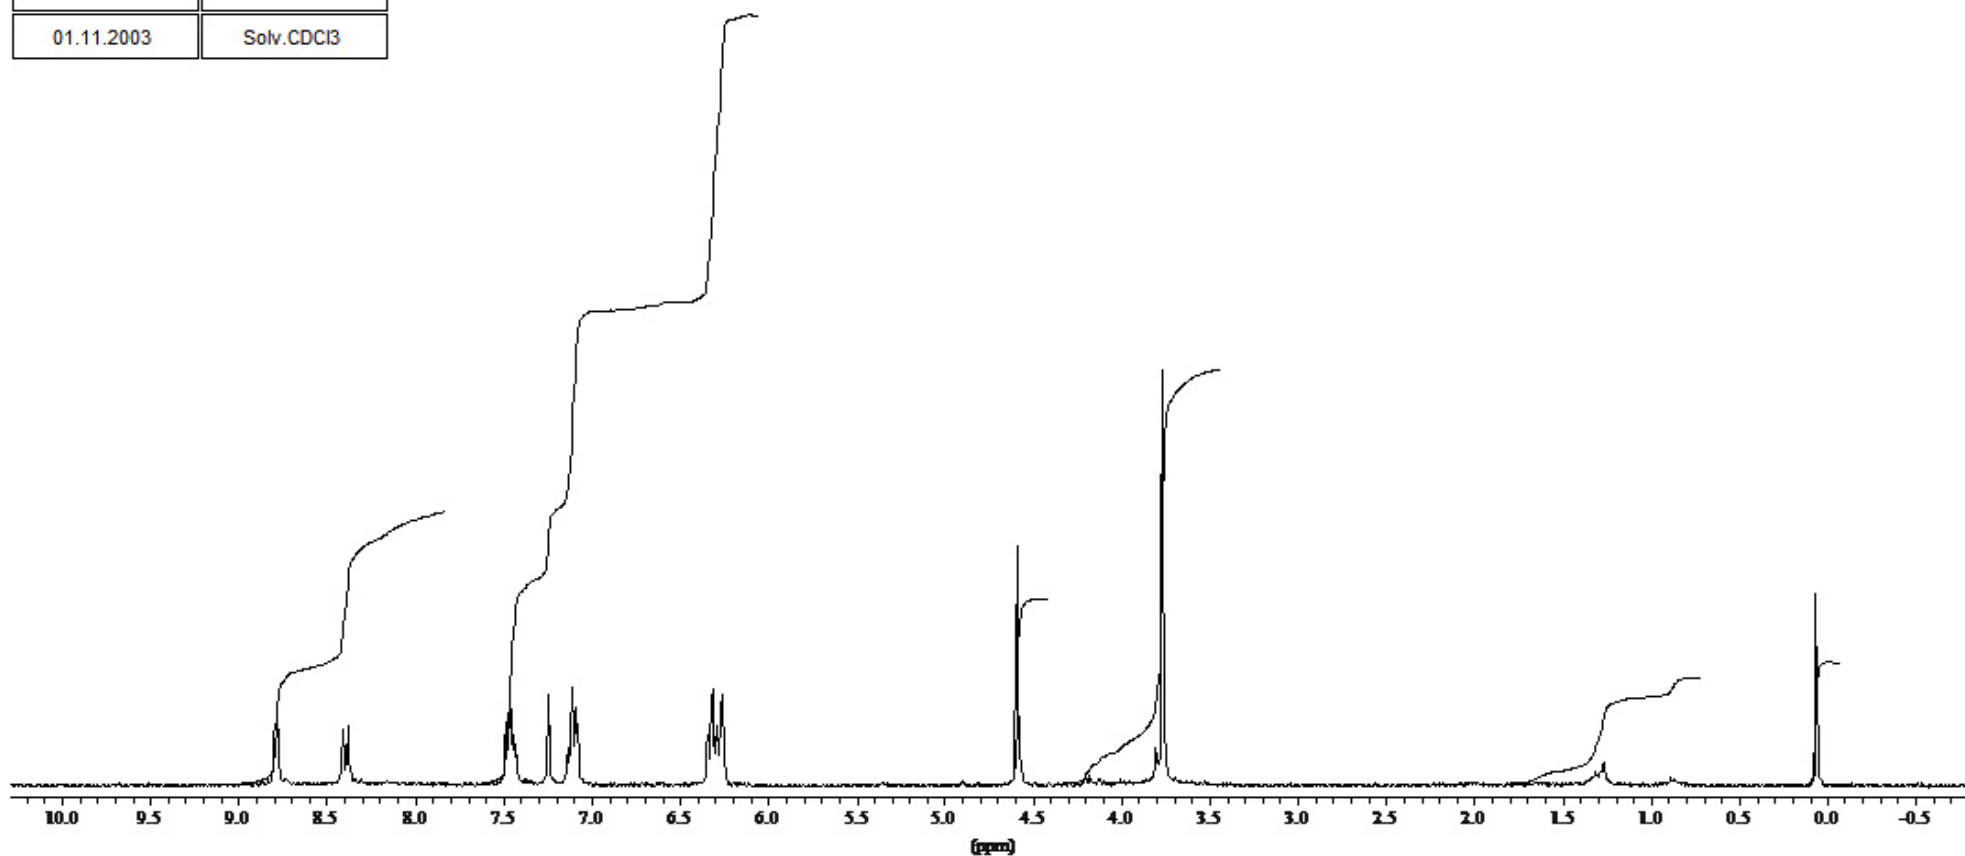

B 7529528 CDCL3

Q2-8

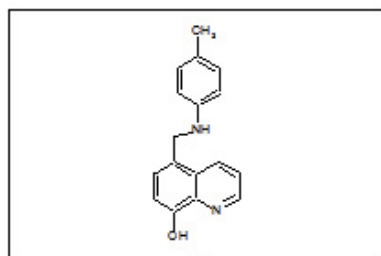

YAP 0000069

\*7529528\*

C<sub>17</sub>H<sub>16</sub>N<sub>2</sub>O

264.3299

BAS 7529528

0531459

01.11.2003

Solv.CDCl3

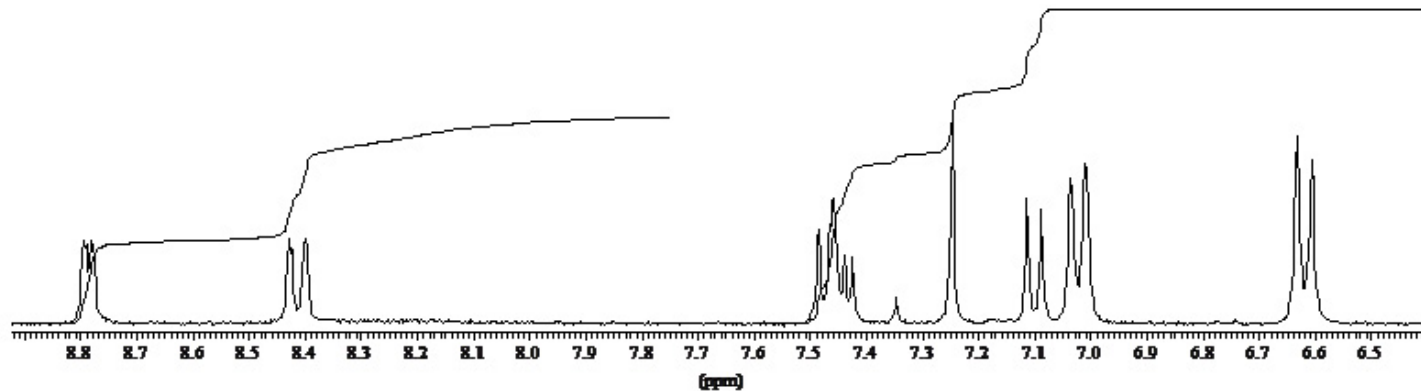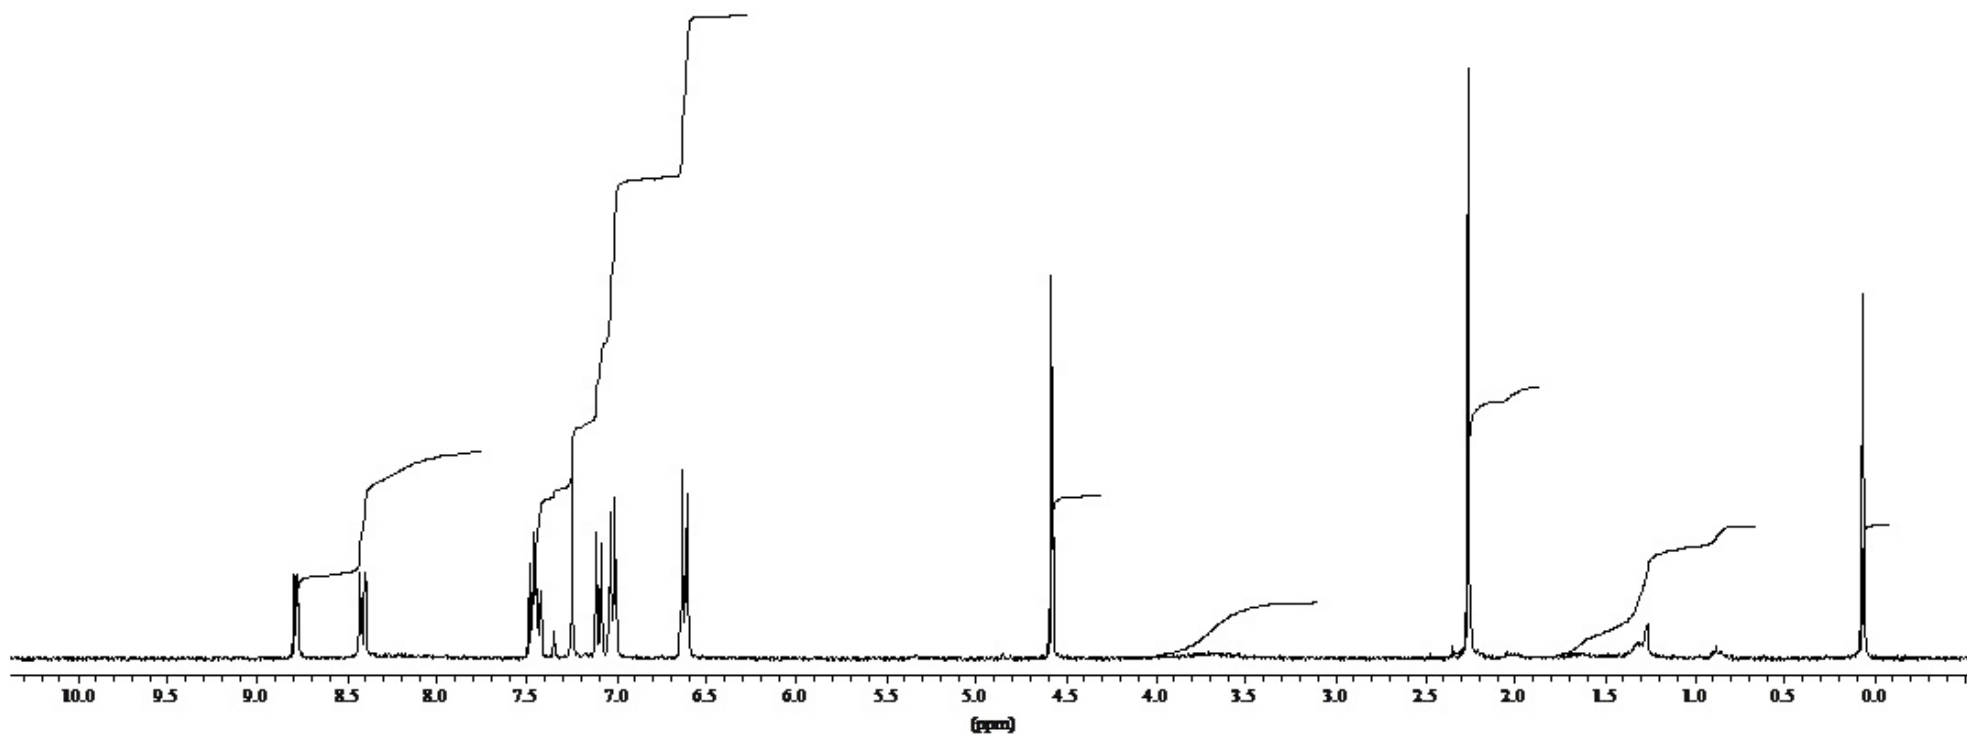



BAS 7529563

Q2-9

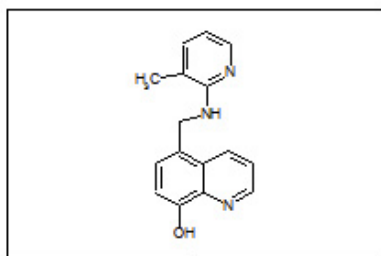

|                                                  |           |
|--------------------------------------------------|-----------|
| YAP 0000104                                      |           |
| *7529563*                                        |           |
| C <sub>16</sub> H <sub>15</sub> N <sub>3</sub> O | 265.3175  |
| BAS 7529563                                      | 0501930   |
| 28.06.2003                                       | Solv.DMSO |

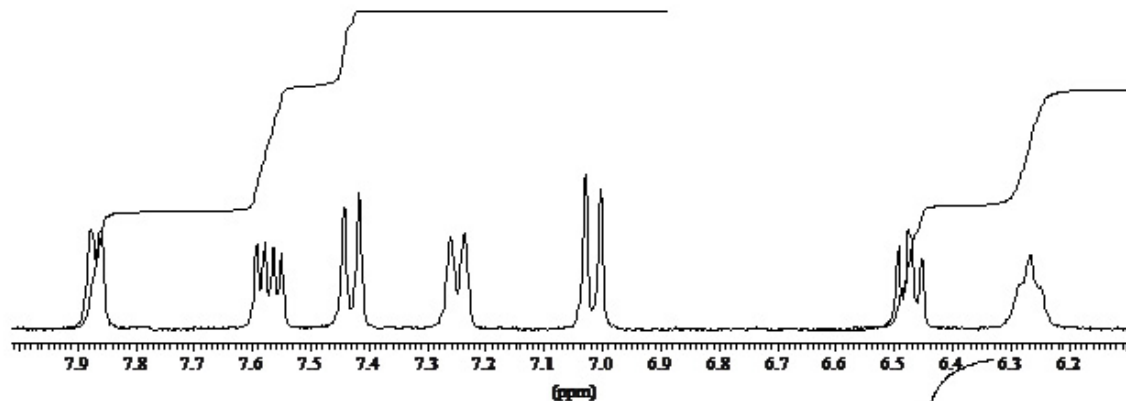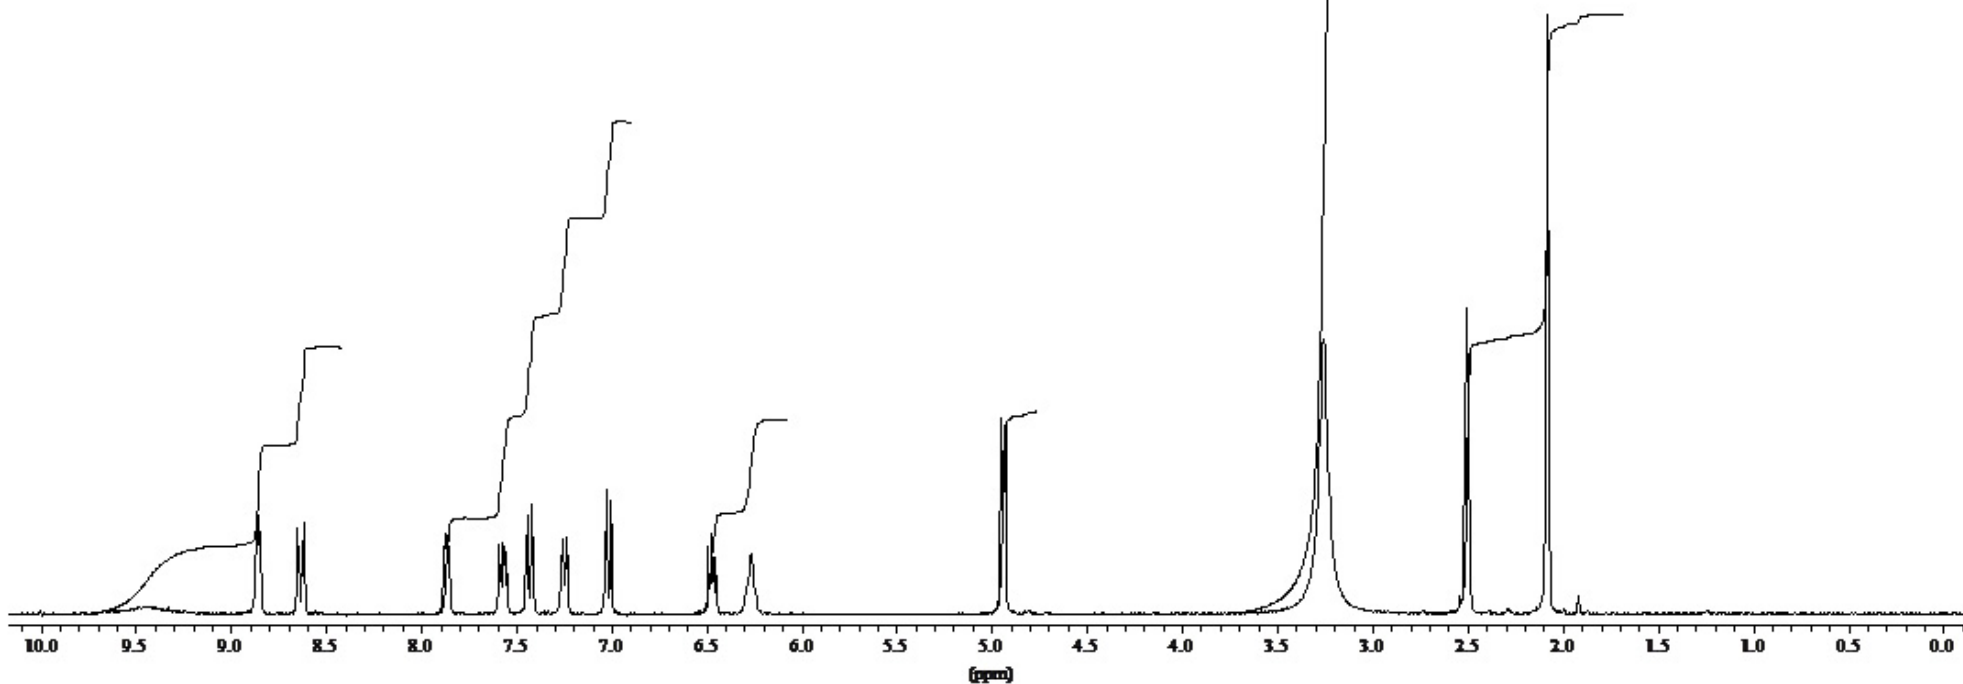

BAS 7529505

Q2-10

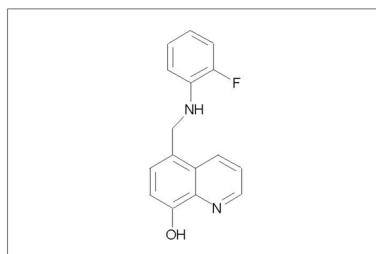

YAP 0000046

**\*7529505\***

$C_{16}H_{13}FN_2O$

268.2932

BAS 7529505

0501904

28.06.2003

Solv. DMSO

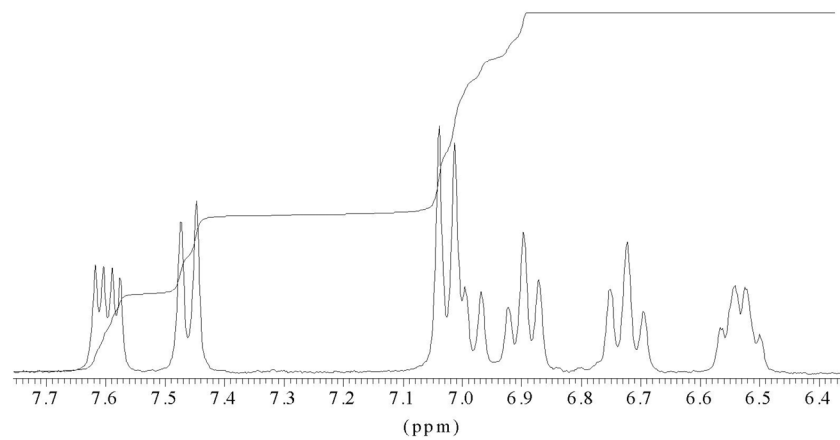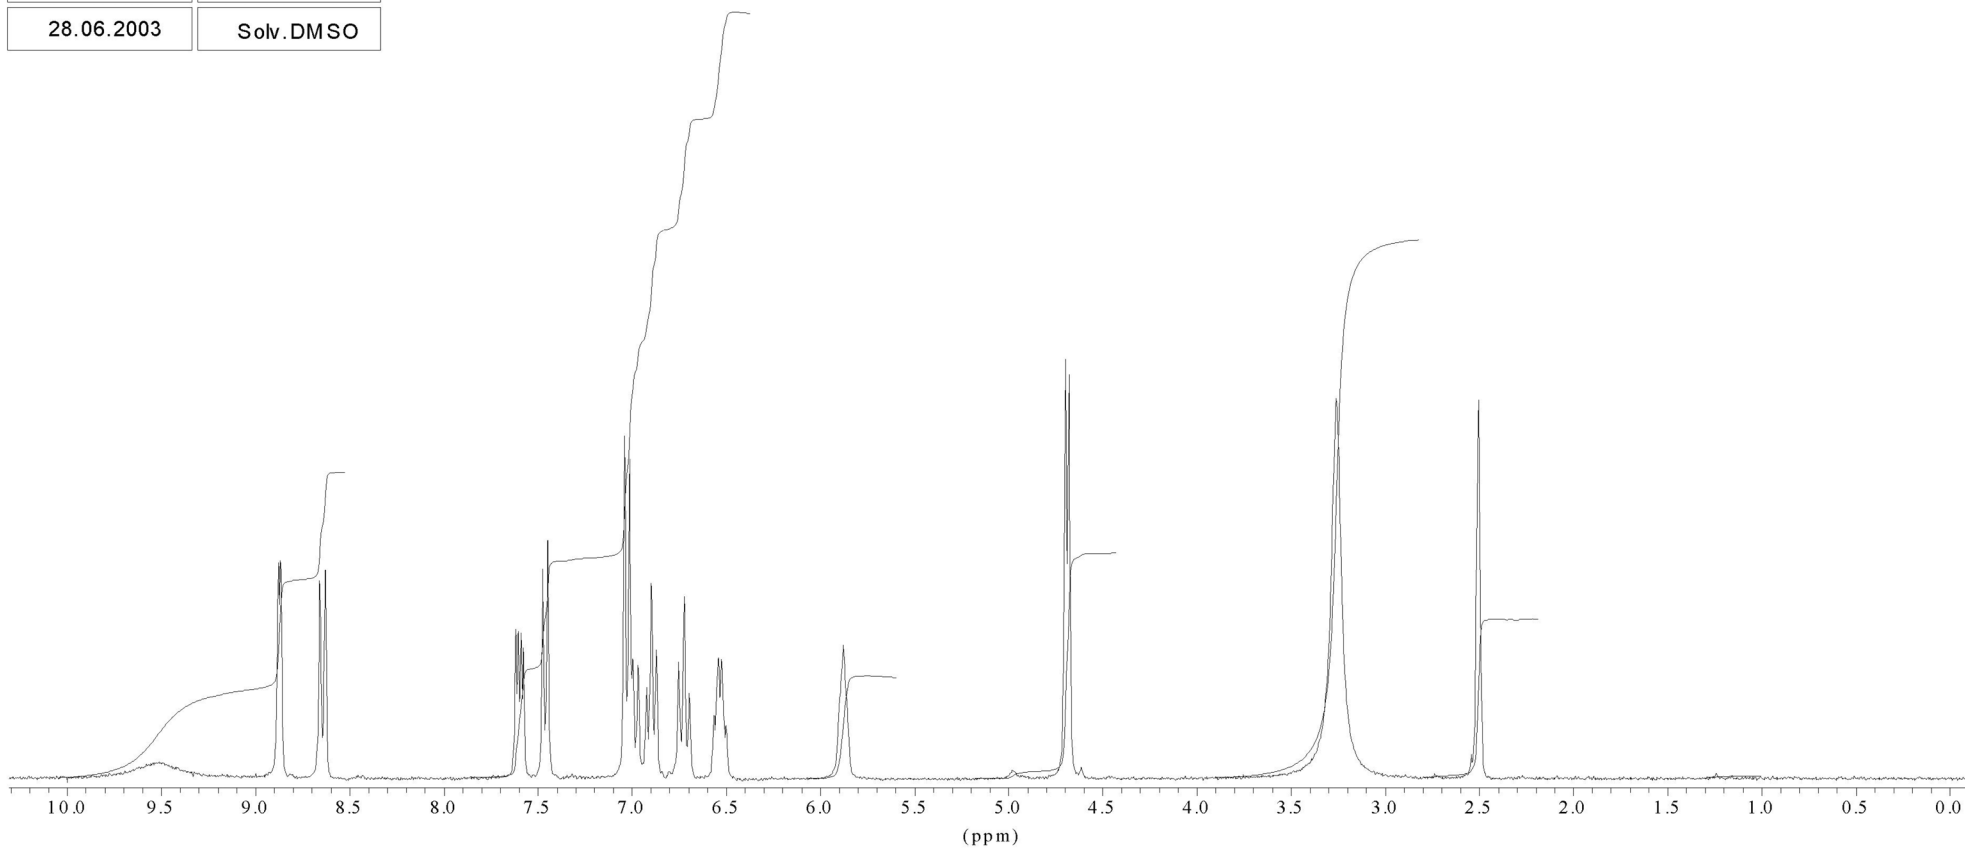

  
\*501904\*

BAS 7529535

Q2-11

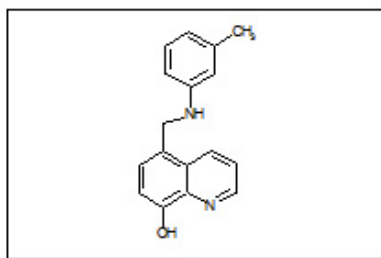

|                                                  |           |
|--------------------------------------------------|-----------|
| YAP 0000076                                      |           |
| *7529535*                                        |           |
| C <sub>17</sub> H <sub>16</sub> N <sub>2</sub> O | 264.3299  |
| BAS 7529535                                      | 0501924   |
| 28.06.2003                                       | Solv.DMSO |

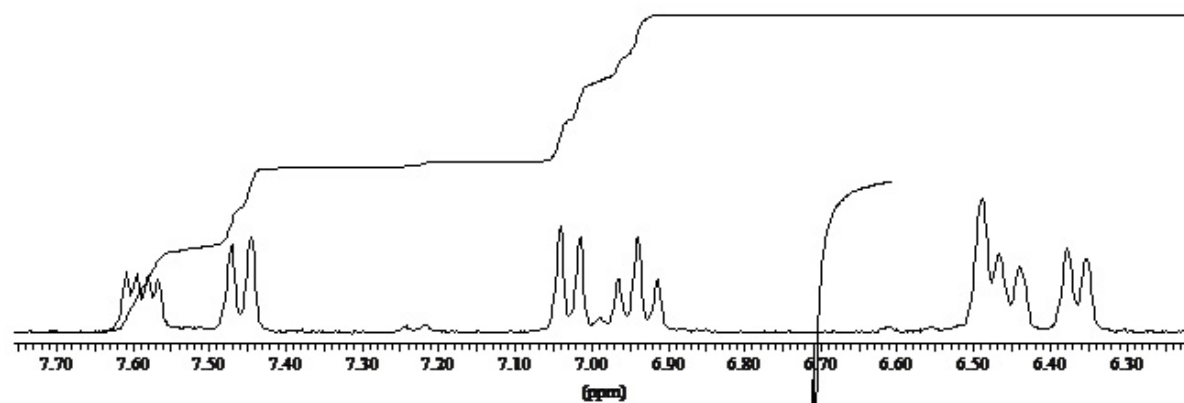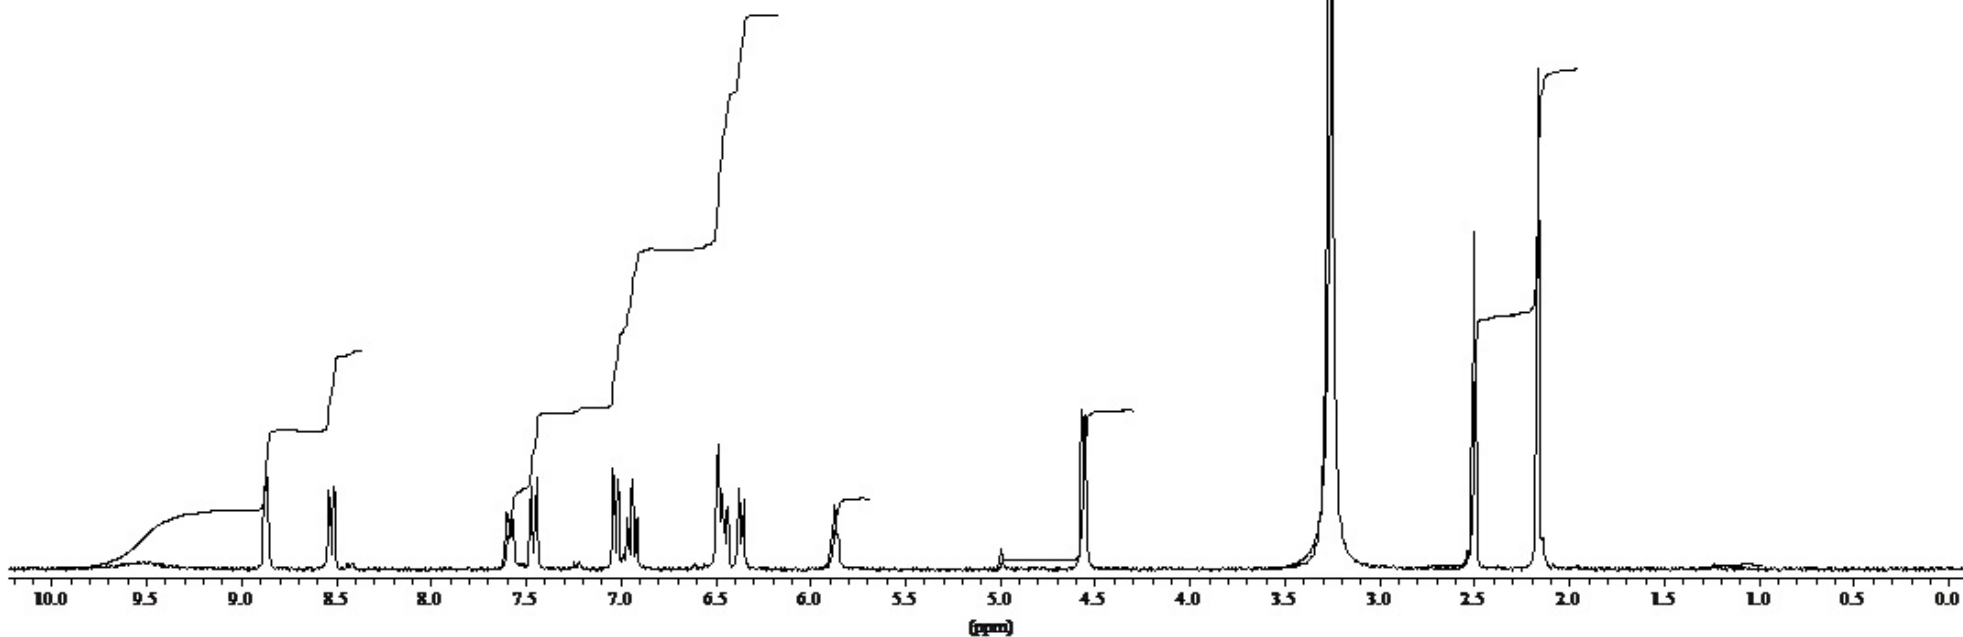

BAS 7529509

Q2-12

|                                                                                   |           |
|-----------------------------------------------------------------------------------|-----------|
| 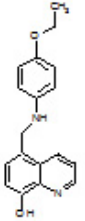 |           |
| YAP 0000050                                                                       |           |
| *7529509*                                                                         |           |
| C <sub>18</sub> H <sub>18</sub> N <sub>2</sub> O <sub>2</sub>                     | 294.3564  |
| BAS 7529509                                                                       | 0501908   |
| 28.06.2003                                                                        | Solv.DMSO |

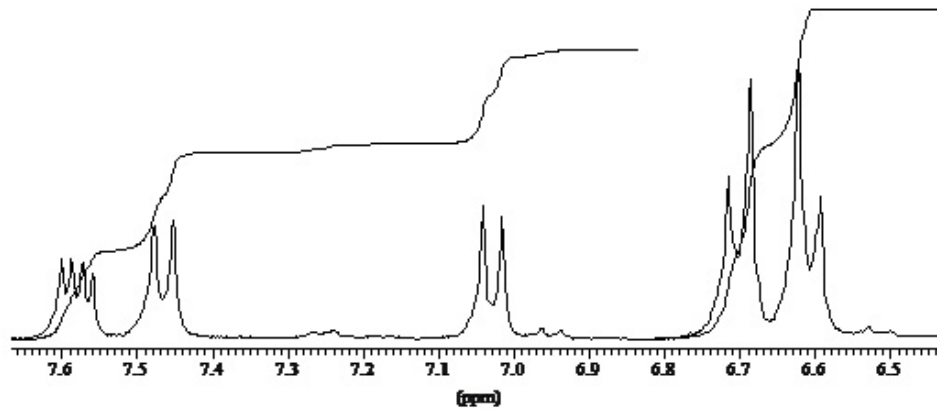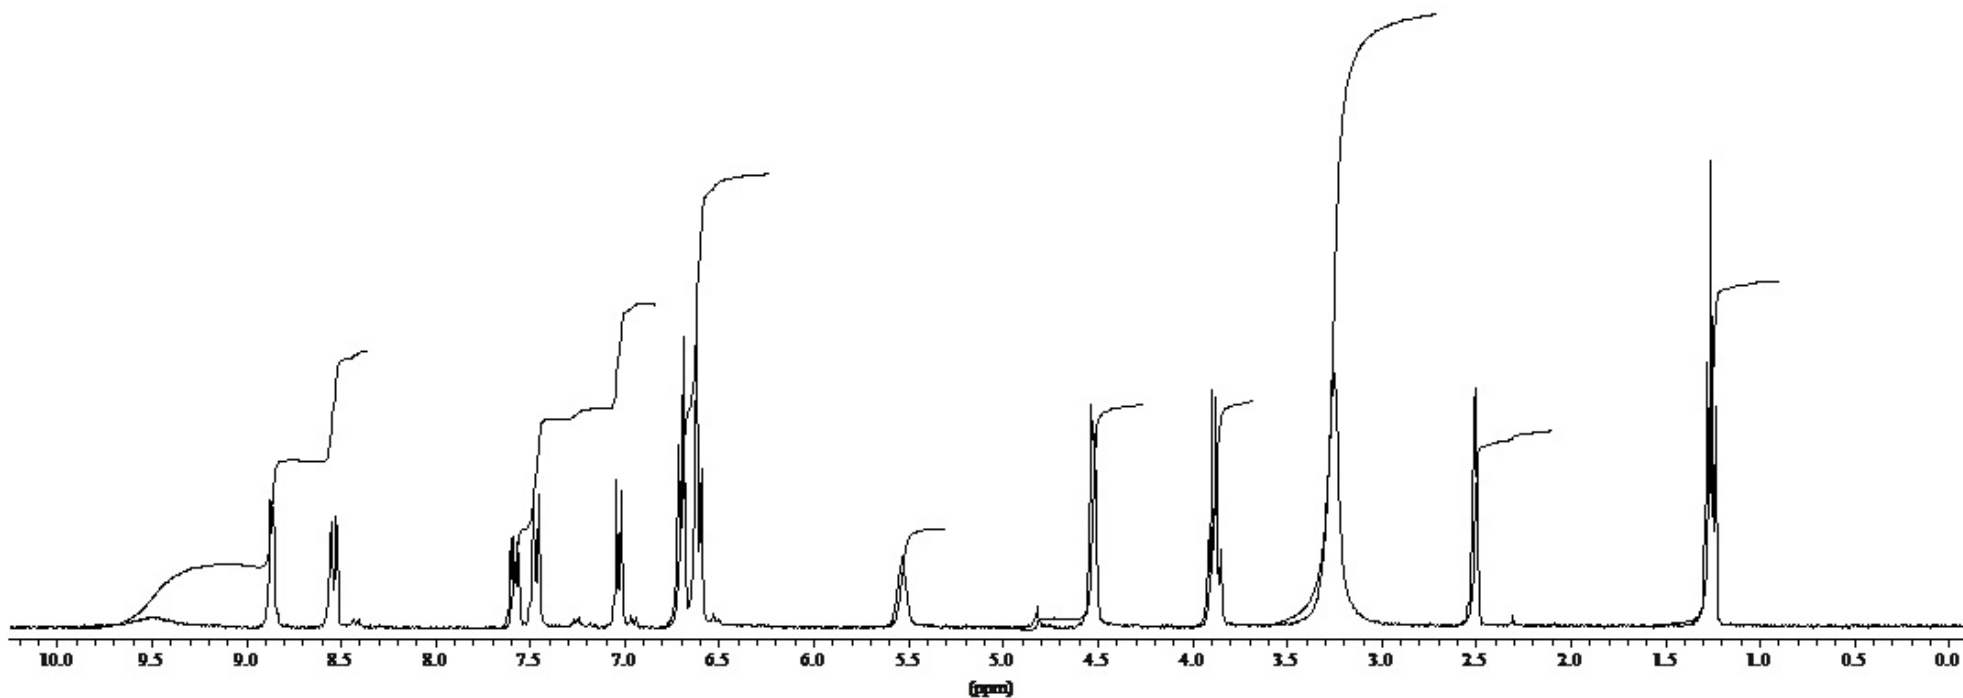

B 7529536 CDCL3

Q2-13

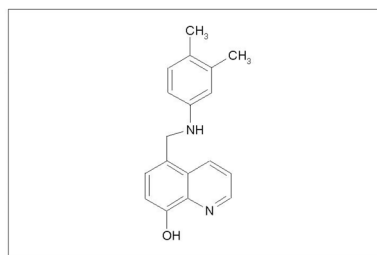

YAP 0000077

\*7529536\*

C<sub>18</sub>H<sub>18</sub>N<sub>2</sub>O

278.3570

BAS 7529536

0531462

01.11.2003

Solv.CDCl3

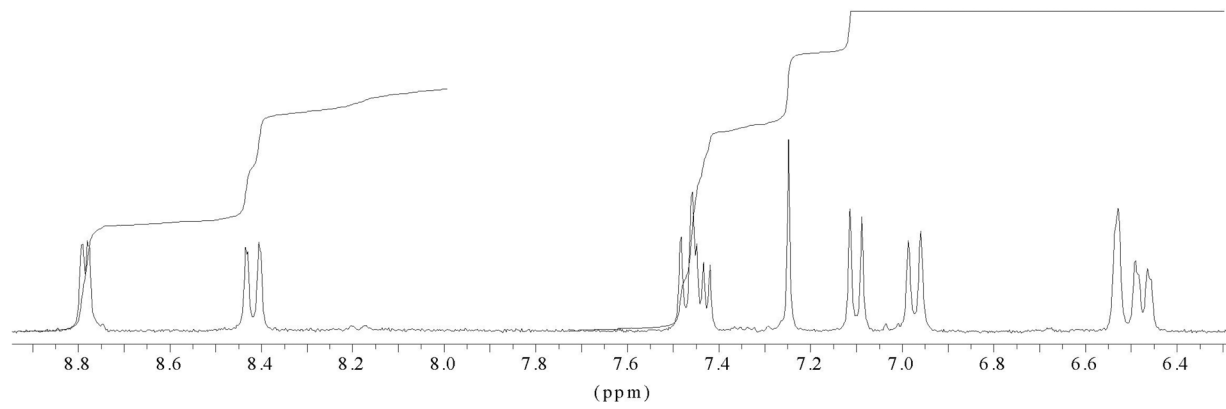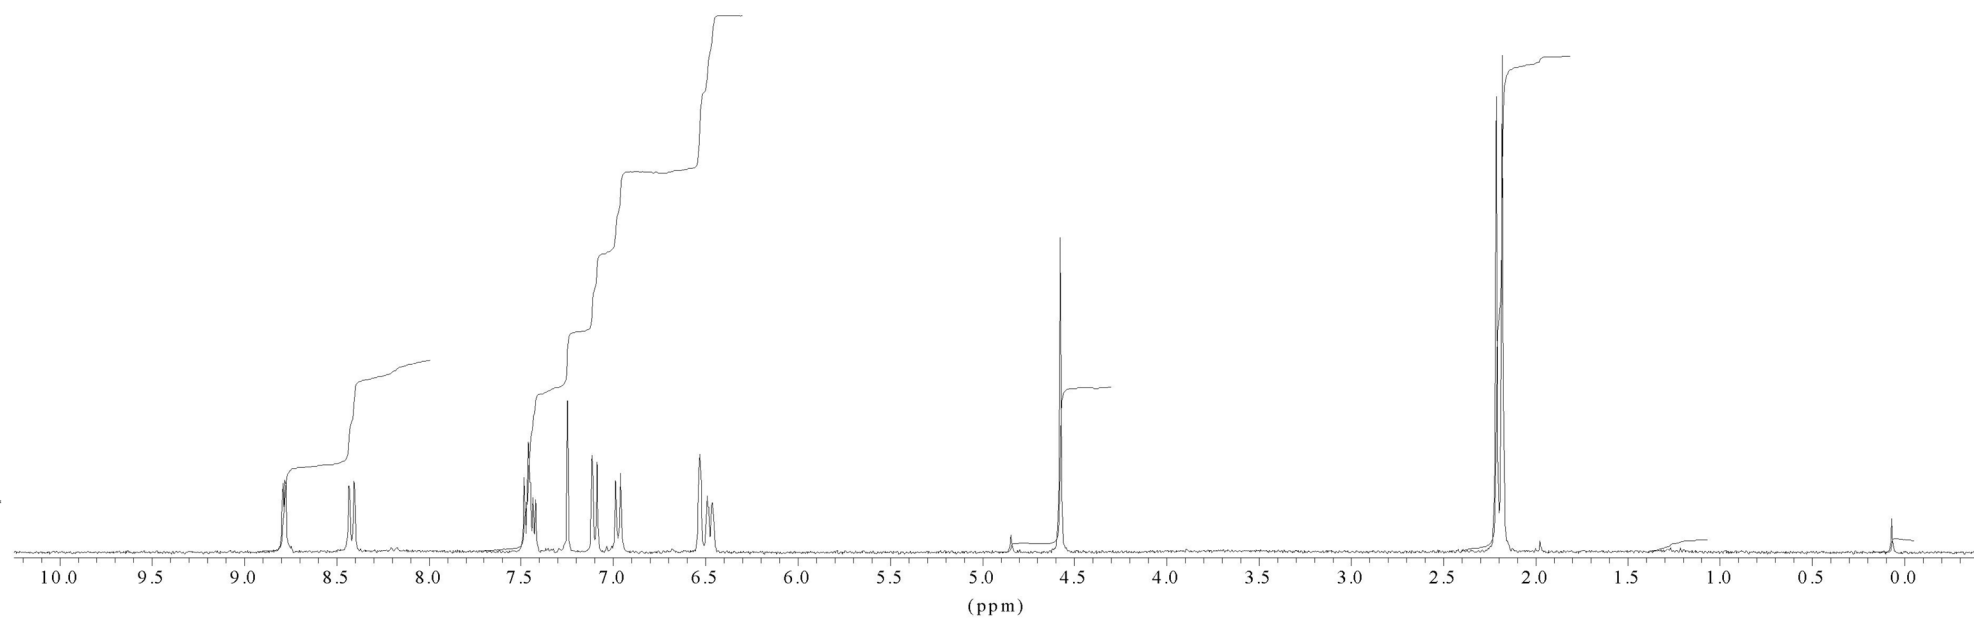

\*531462\*

BAS 7529539

Q2-14

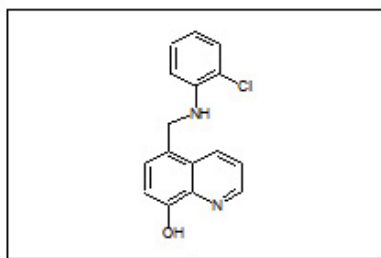

|                      |           |
|----------------------|-----------|
| YAP 0000080          |           |
| *7529539*            |           |
| $C_{16}H_{13}ClN_2O$ | 284.7478  |
| BAS 7529539          | 0501927   |
| 28.06.2003           | Solv.DMSO |

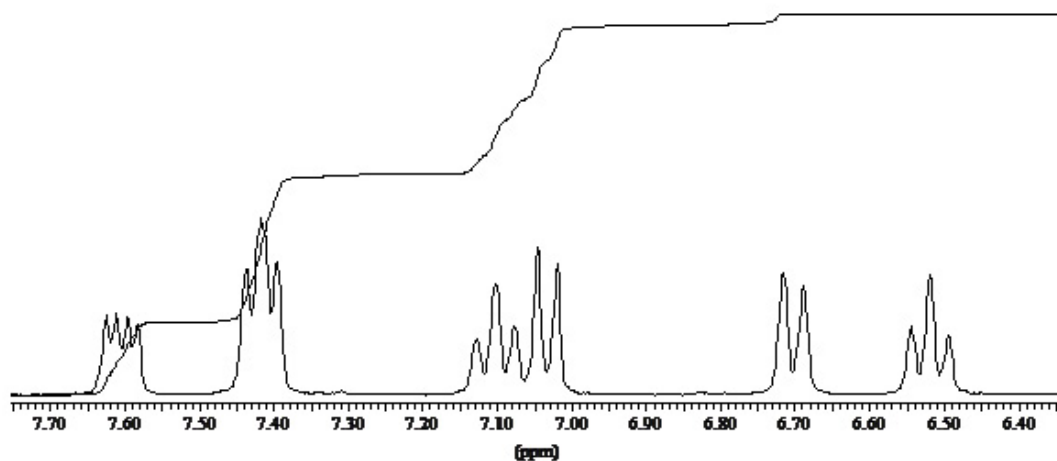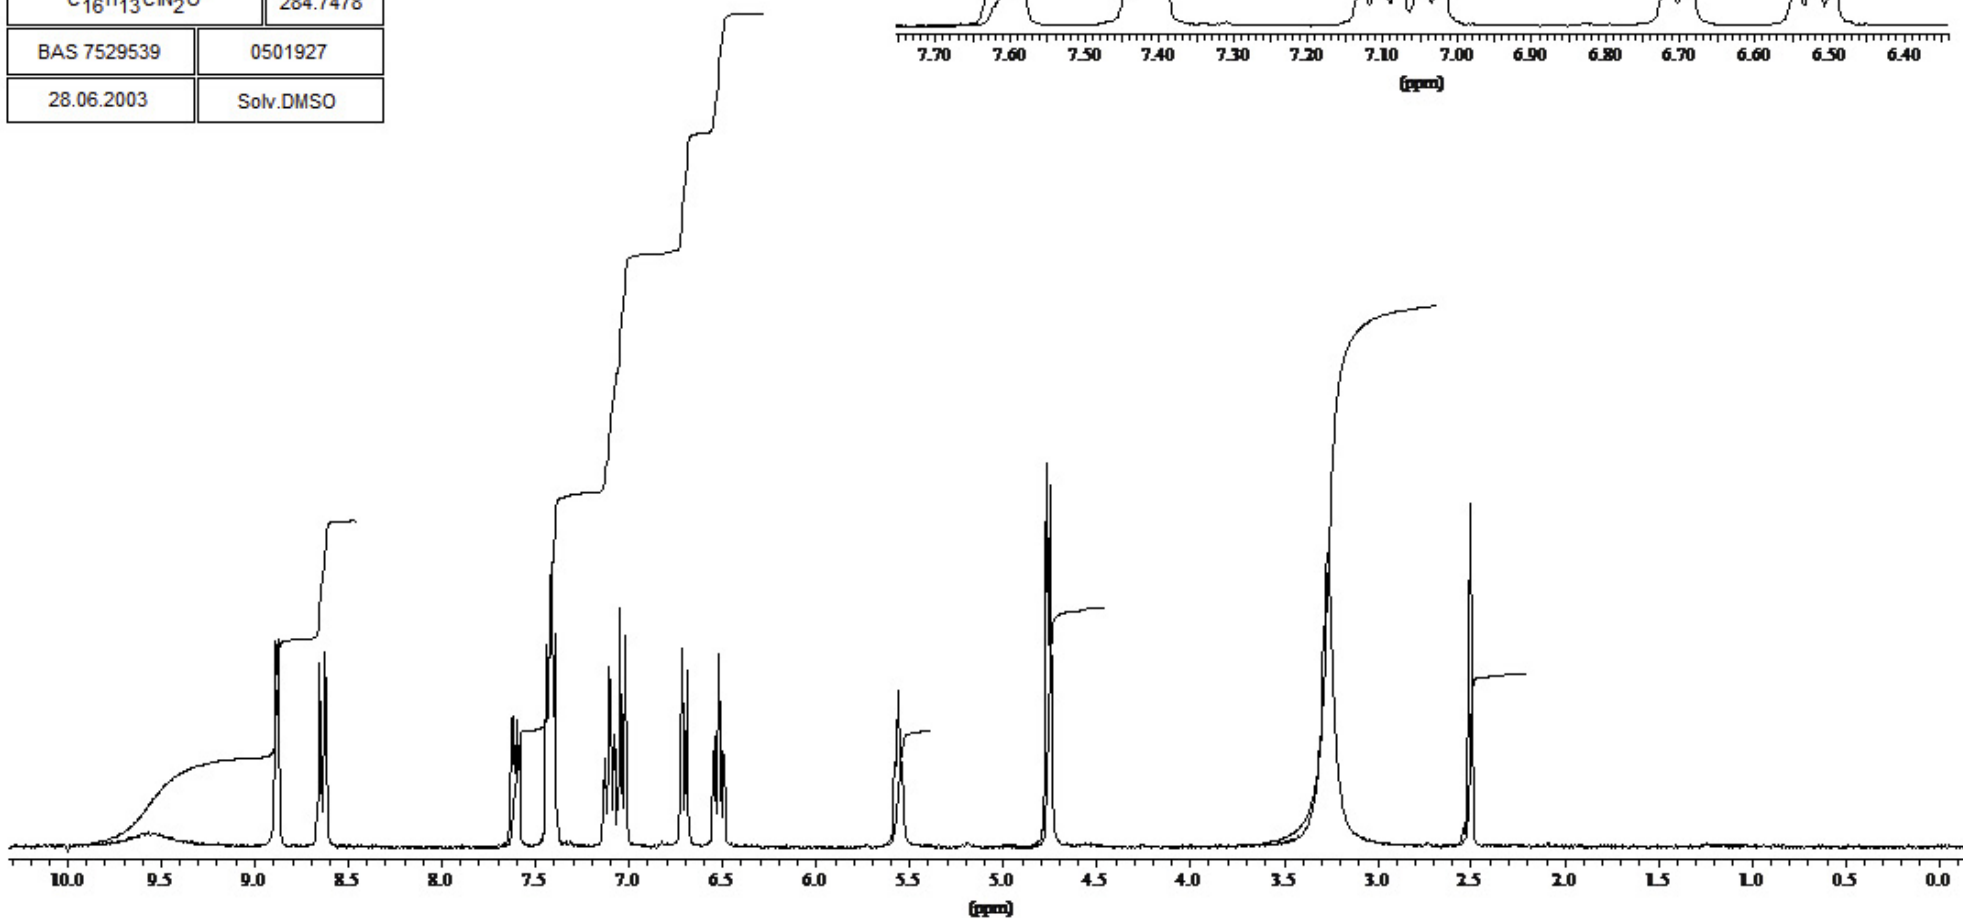

Q3-1

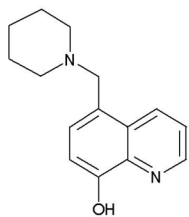

YAP 0000075

0521184

\*7529534\*

C<sub>15</sub>H<sub>18</sub>N<sub>2</sub>O

242.32

BAS 7529534

16.09.2003

Solvent:CDCl<sub>3</sub>

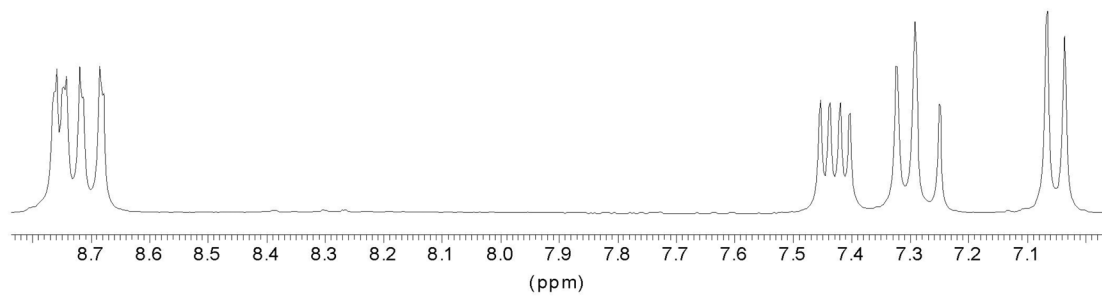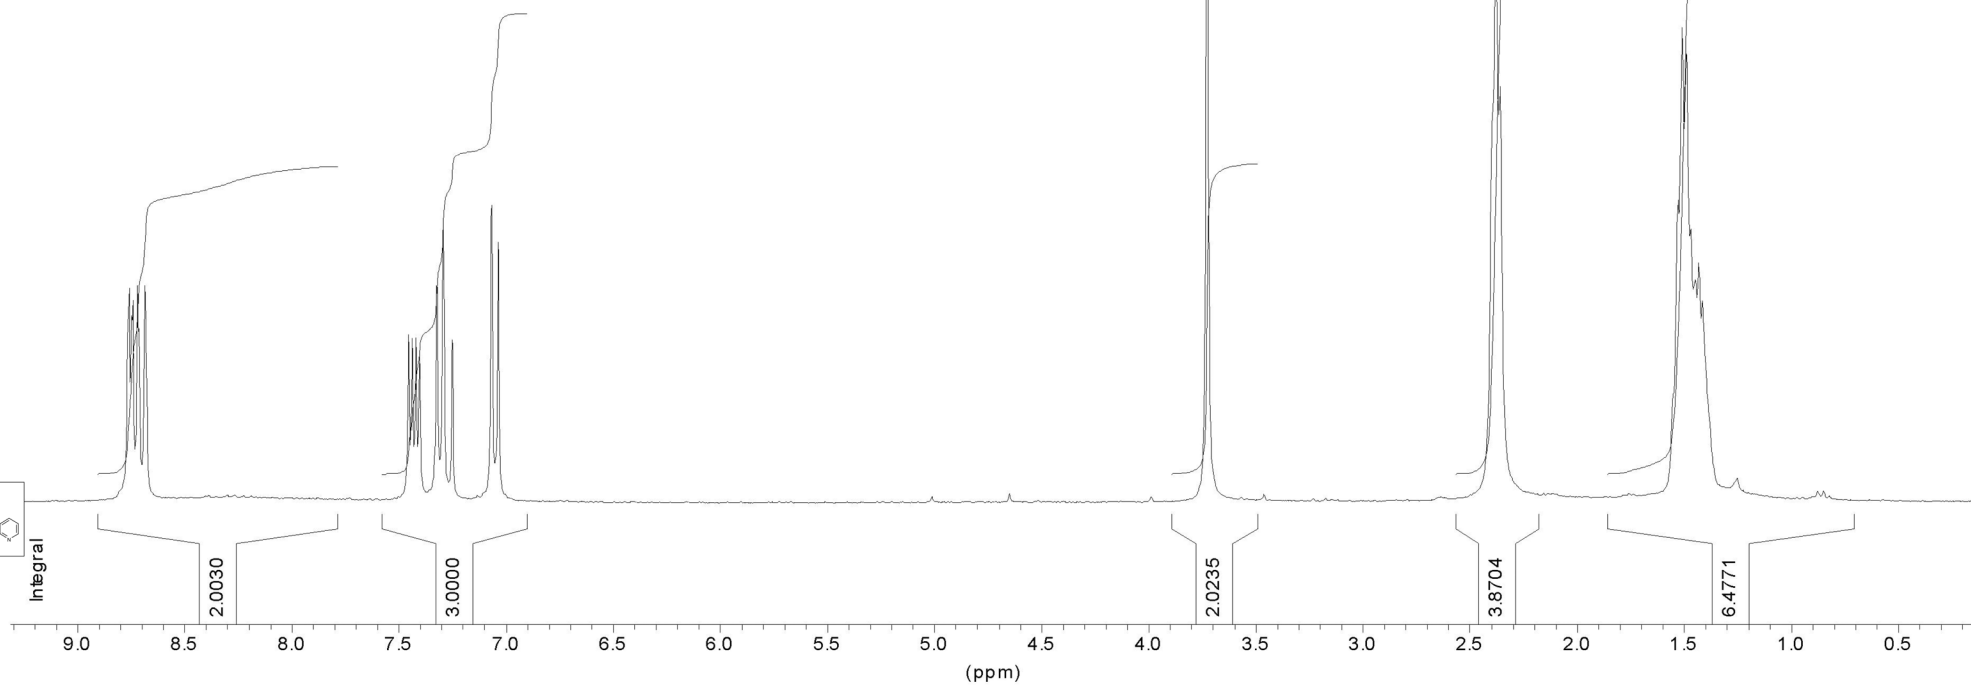

BAS 7529515

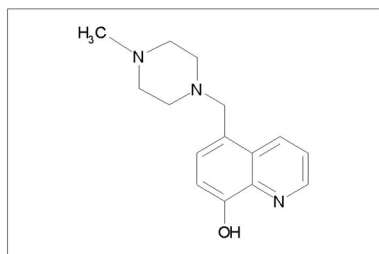

YAP 000056

**\*7529515\***

C<sub>15</sub>H<sub>19</sub>N<sub>3</sub>O

257.3382

BAS 7529515

0501911

28.06.2003

Solv. DMSO

Q3-2

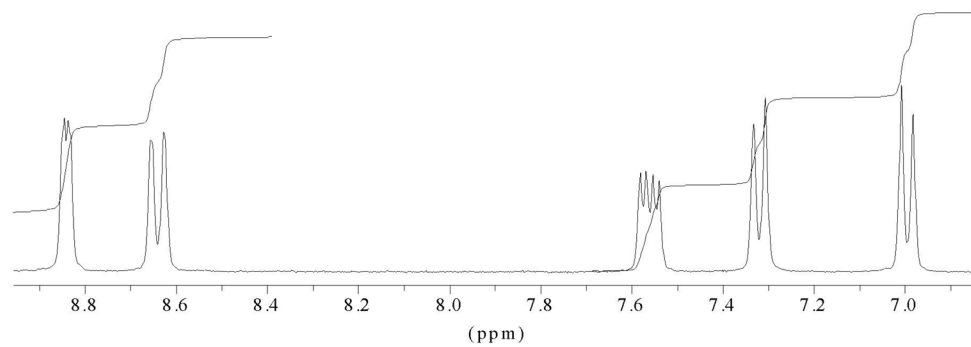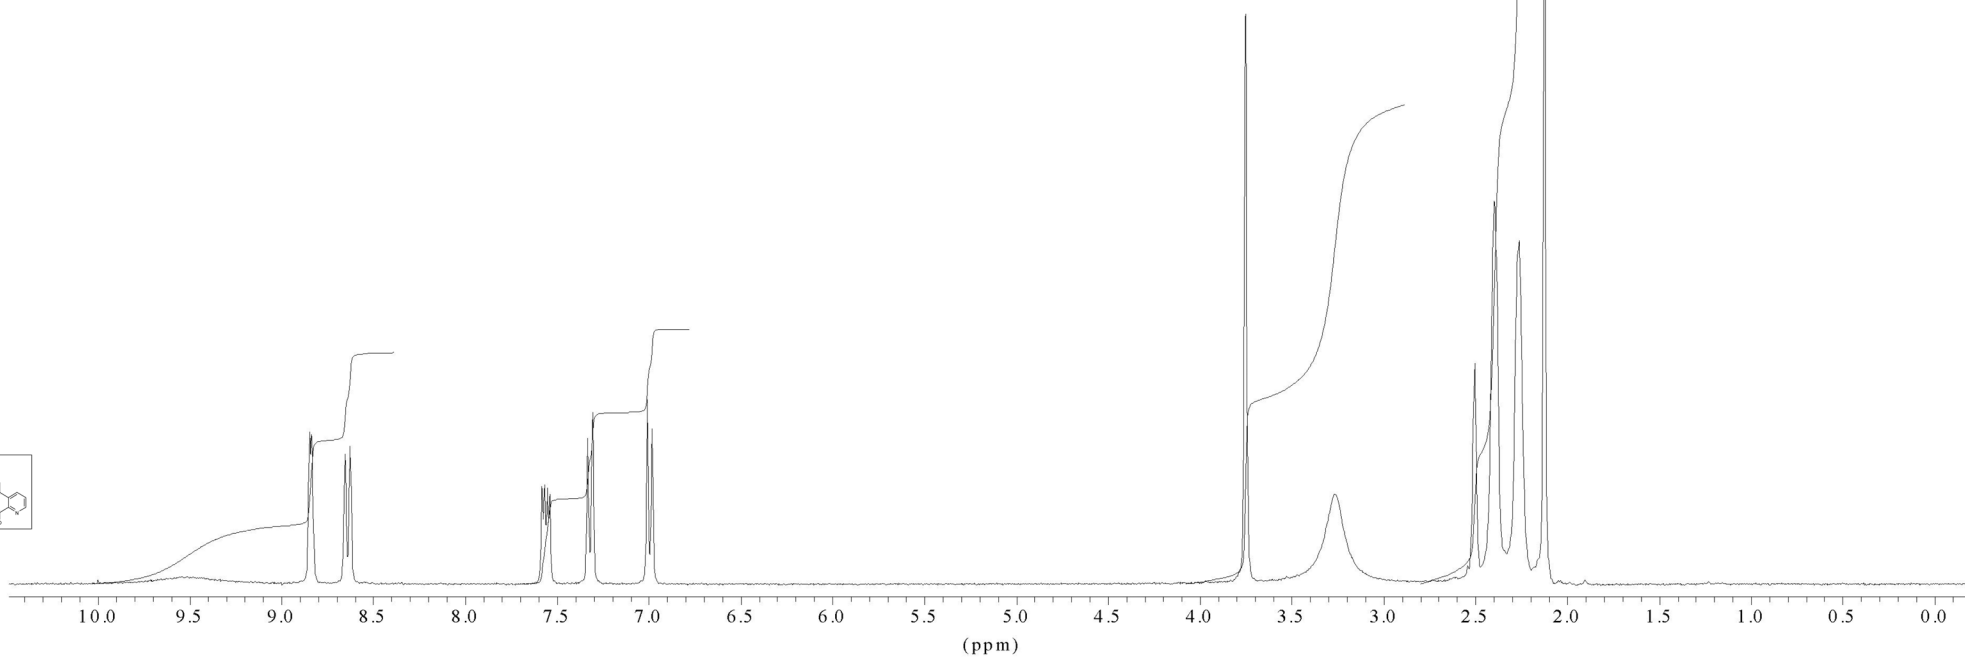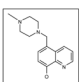

\*501911\*



BAS 7529516

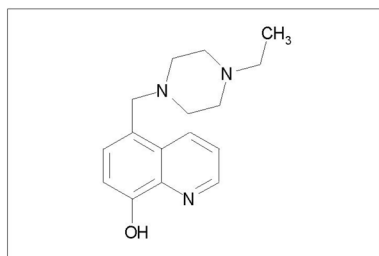

YAP 000057

**\*7529516\***

C<sub>16</sub>H<sub>21</sub>N<sub>3</sub>O

271.3653

BAS 7529516

0501912

28.06.2003

Solv. DMSO

Q3-3

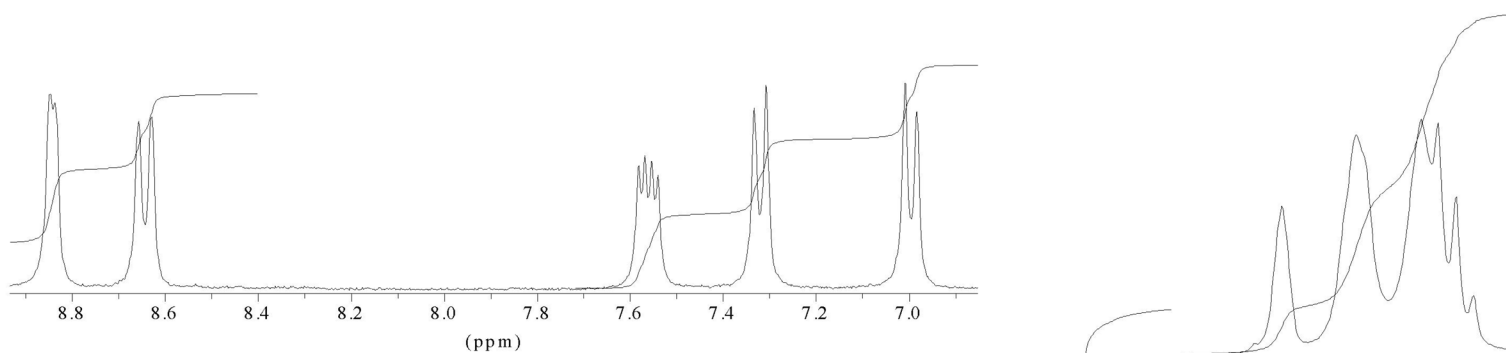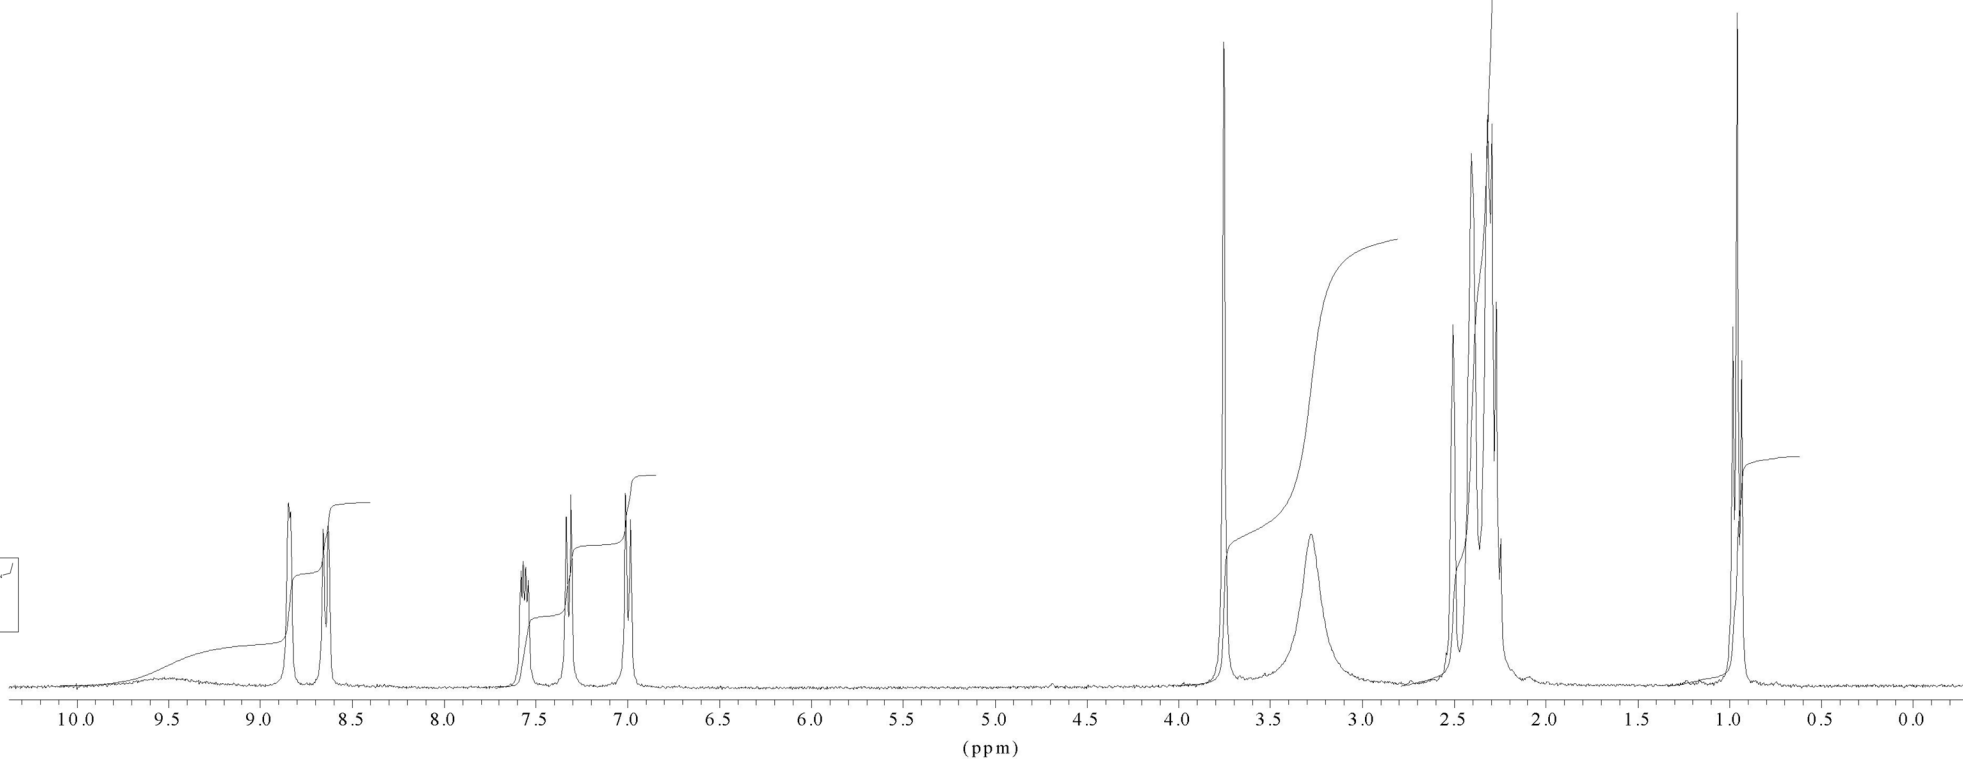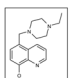

\*501912\*

BAS 7529517

Q3-4

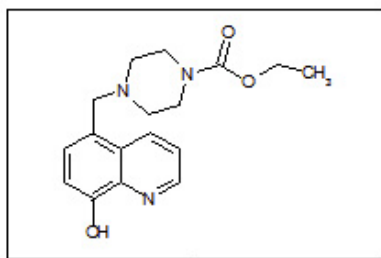

|                                                               |           |
|---------------------------------------------------------------|-----------|
| YAP 0000058                                                   |           |
| *7529517*                                                     |           |
| C <sub>17</sub> H <sub>21</sub> N <sub>3</sub> O <sub>3</sub> | 315.3752  |
| BAS 7529517                                                   | 0501913   |
| 28.06.2003                                                    | Solv.DMSO |

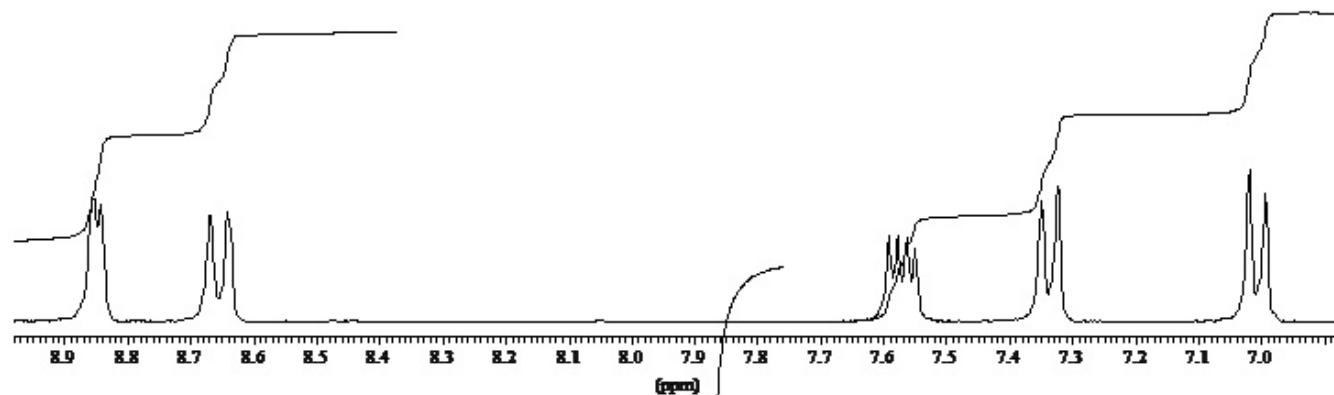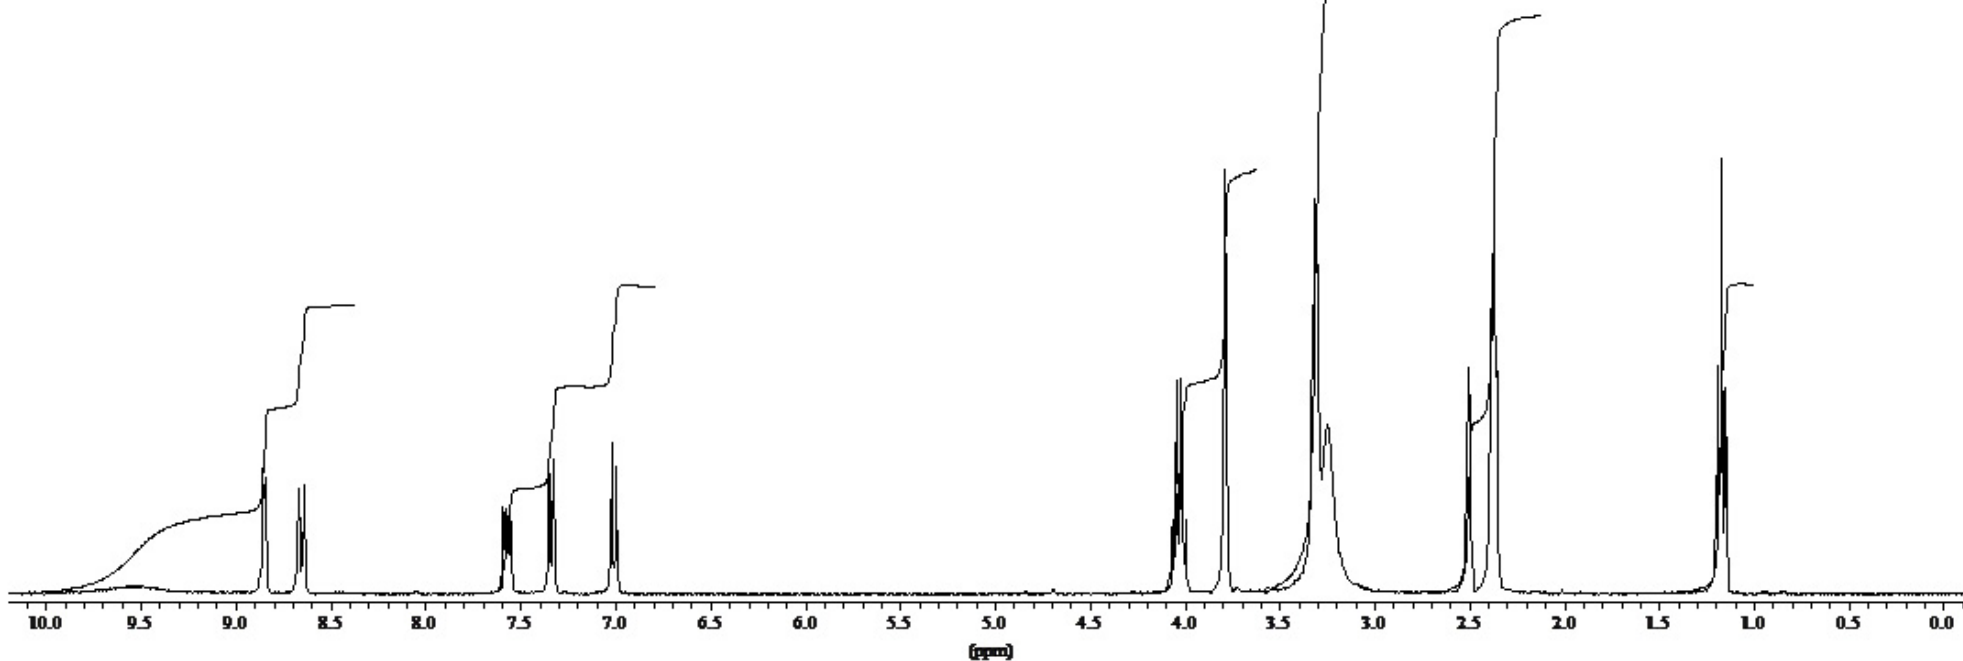

BAS 7529519

Q3-5

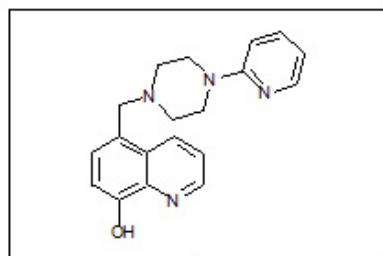

|                                                  |           |
|--------------------------------------------------|-----------|
| YAP 0000060                                      |           |
| *7529519*                                        |           |
| C <sub>19</sub> H <sub>20</sub> N <sub>4</sub> O | 320.3974  |
| BAS 7529519                                      | 0501914   |
| 28.06.2003                                       | Solv.DMSO |

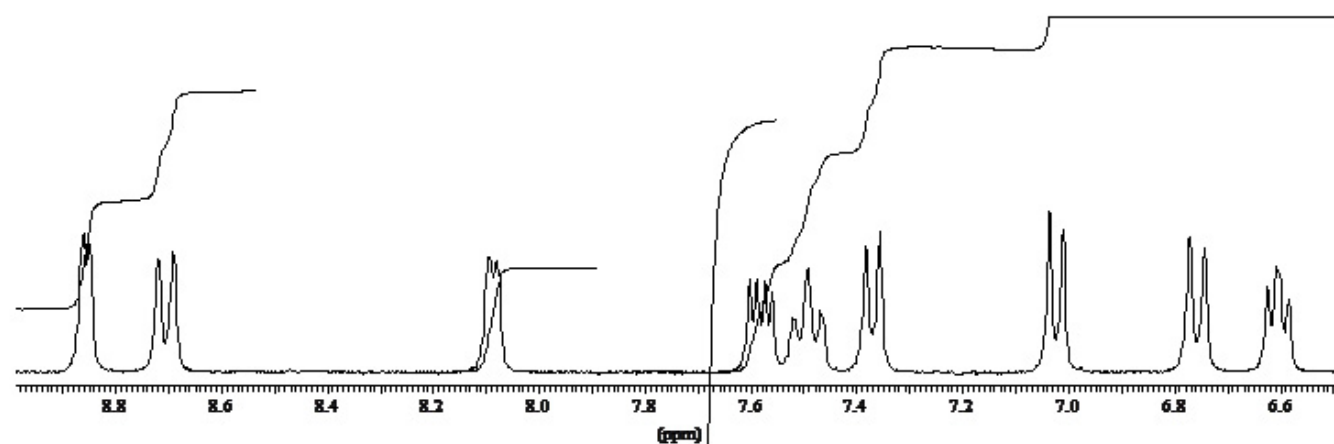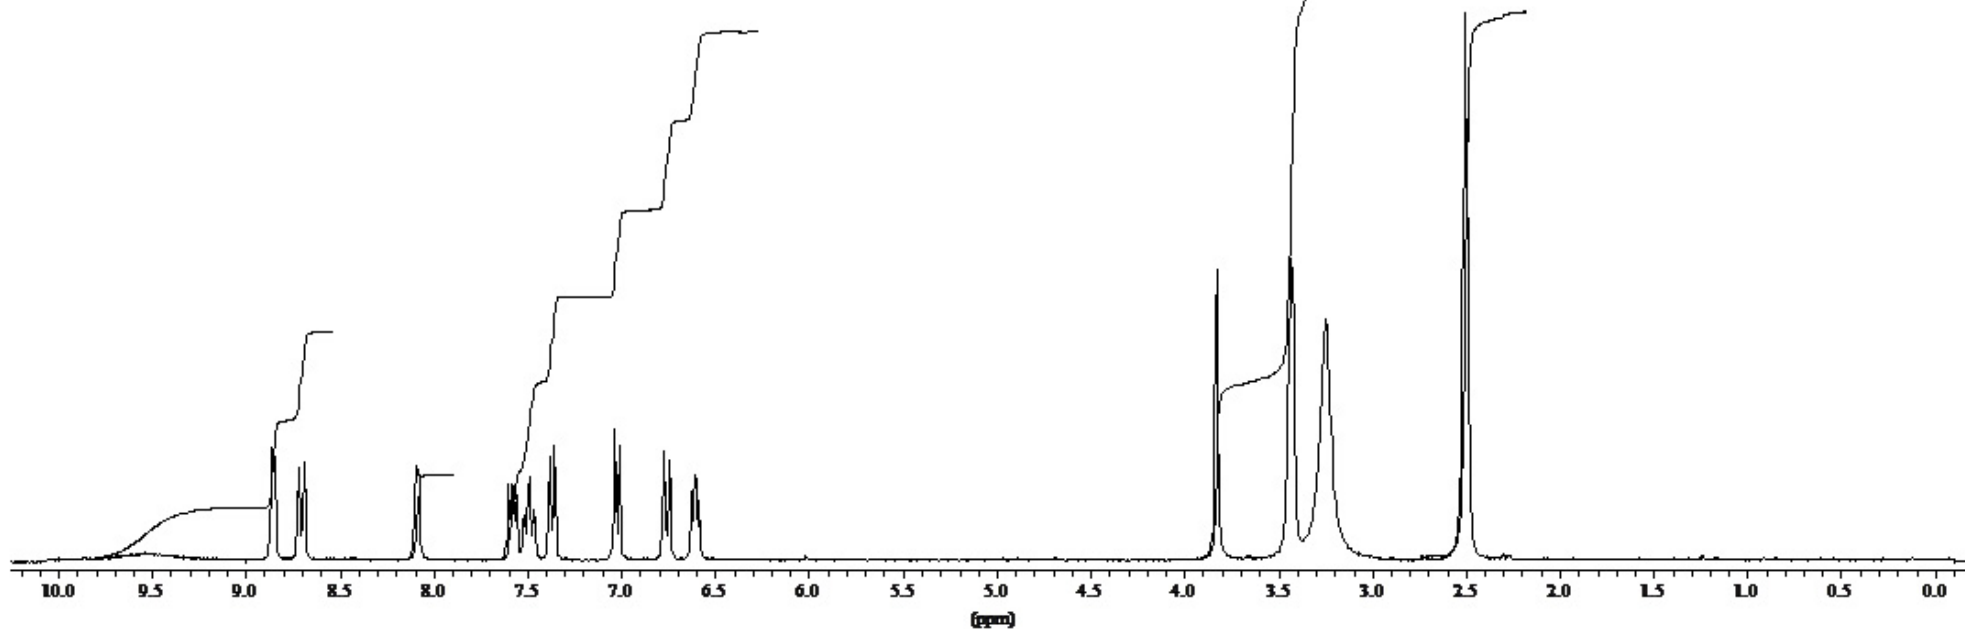

BAS 7529512

Q3-6

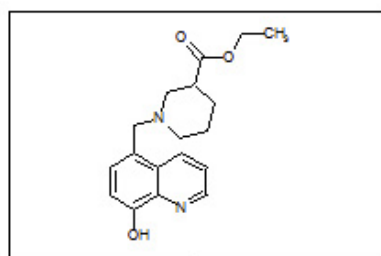

|                                                               |           |
|---------------------------------------------------------------|-----------|
| YAP 0000053                                                   |           |
| *7529512*                                                     |           |
| C <sub>18</sub> H <sub>22</sub> N <sub>2</sub> O <sub>3</sub> | 314.3876  |
| BAS 7529512                                                   | 0501910   |
| 28.06.2003                                                    | Solv.DMSO |

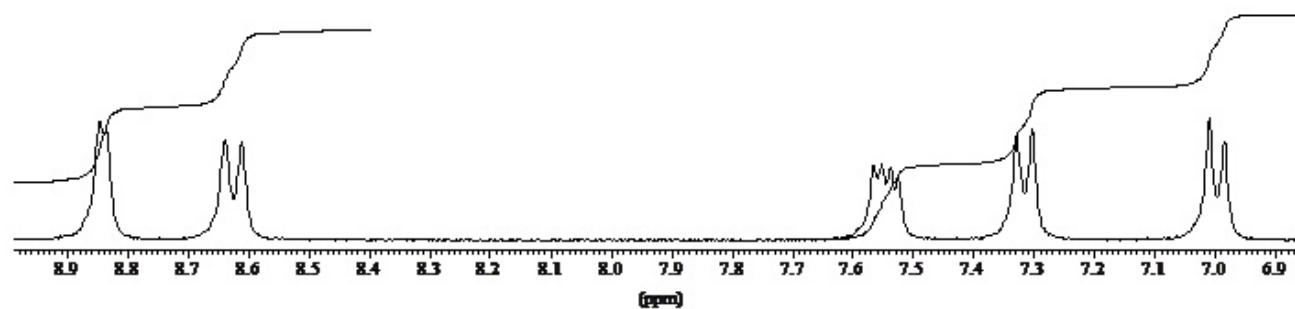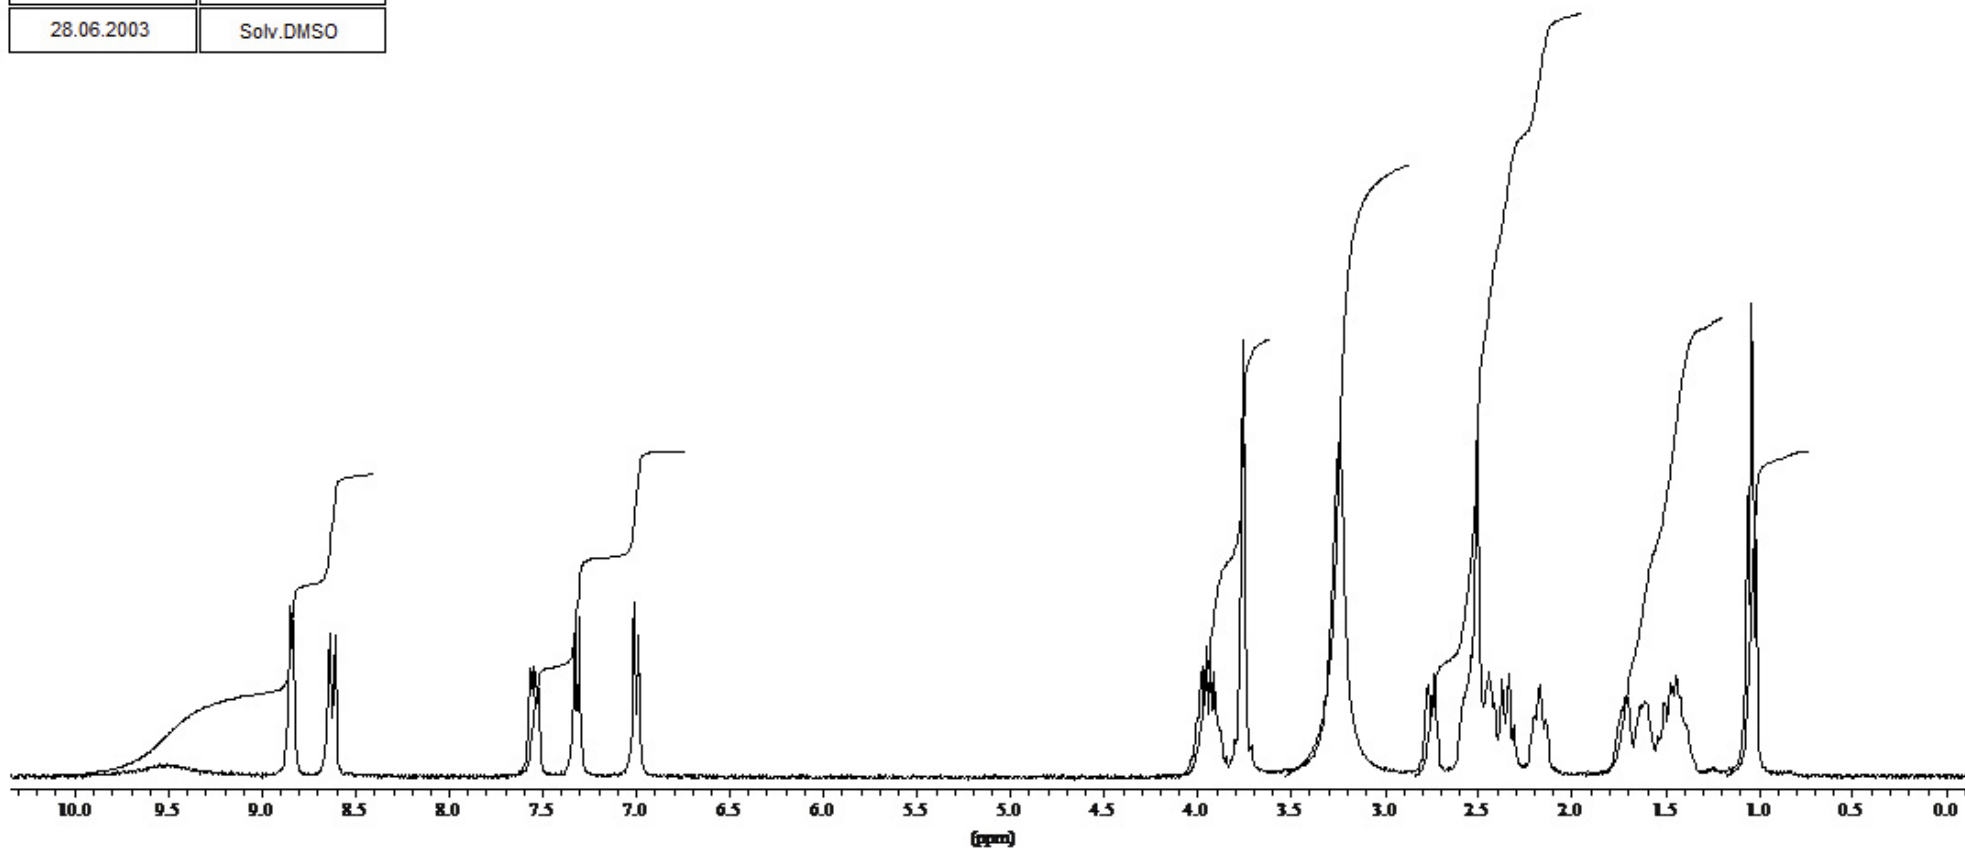

BAS 7529522

Q3-7

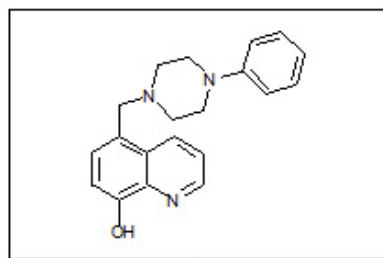

|                                                  |           |
|--------------------------------------------------|-----------|
| YAP 0000063                                      |           |
| *7529522*                                        |           |
| C <sub>20</sub> H <sub>21</sub> N <sub>3</sub> O | 319.4099  |
| BAS 7529522                                      | 0501917   |
| 28.06.2003                                       | Solv.DMSO |

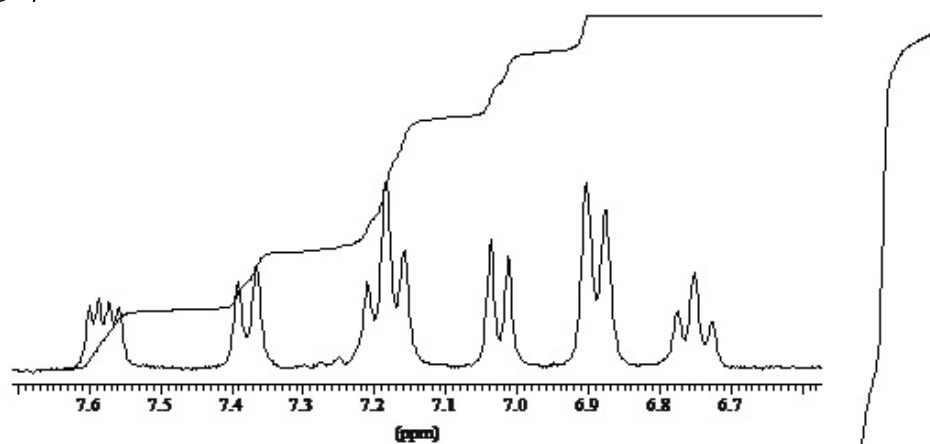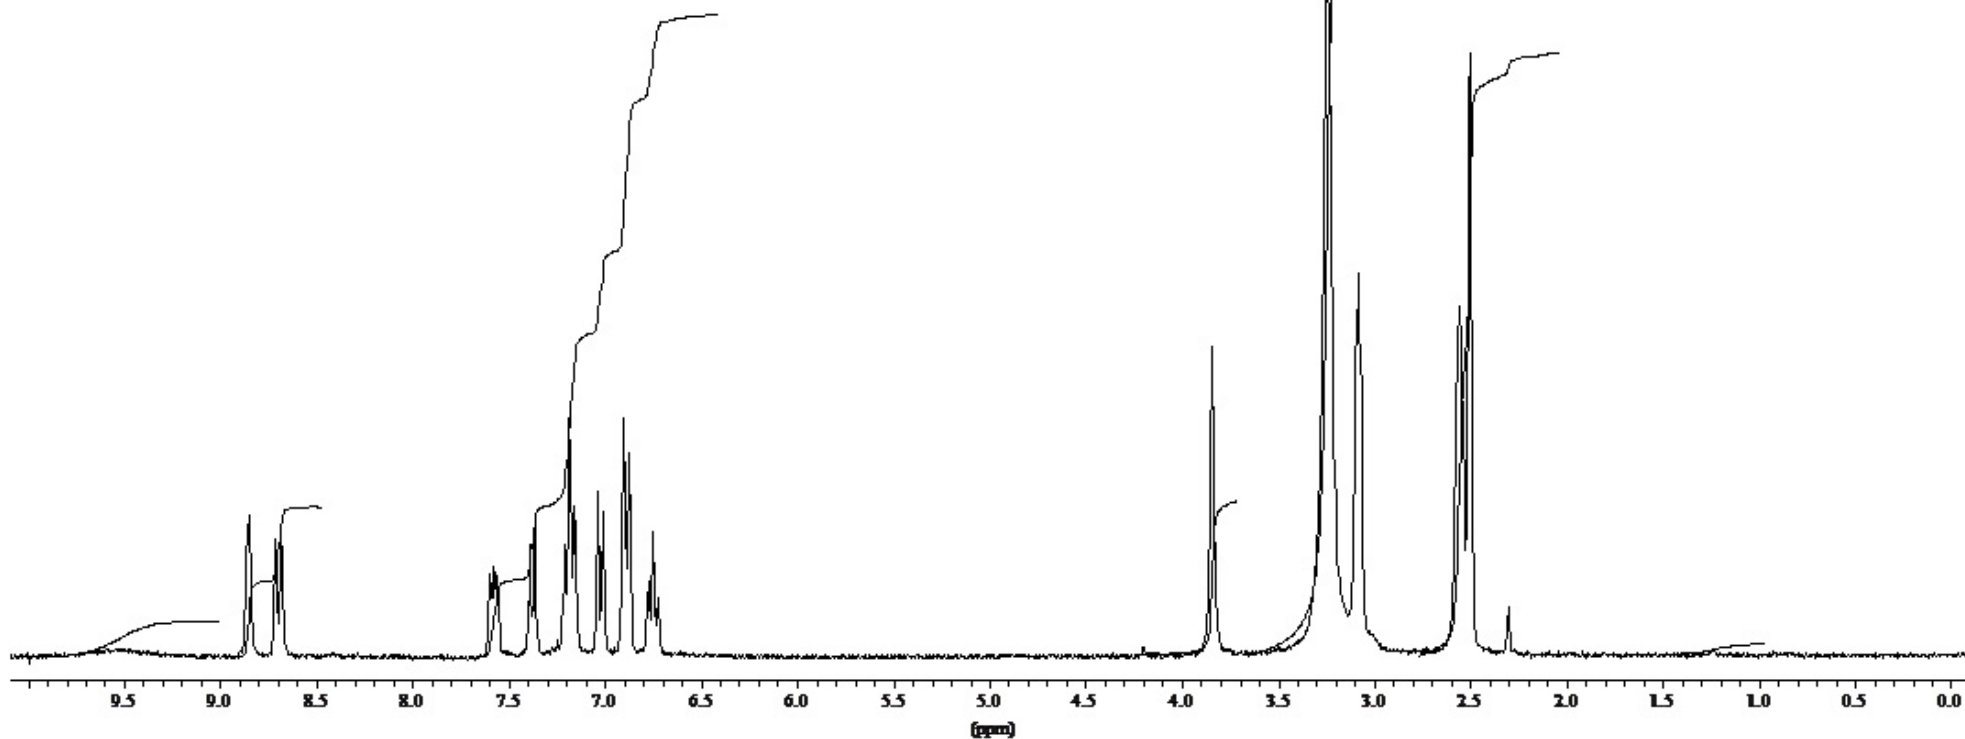

BAS 7529511

Q3-8

|                                                                                   |           |
|-----------------------------------------------------------------------------------|-----------|
| 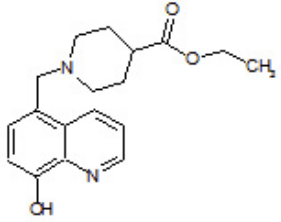 |           |
| YAP 0000052                                                                       |           |
| *7529511*                                                                         |           |
| C <sub>18</sub> H <sub>22</sub> N <sub>2</sub> O <sub>3</sub>                     | 314.3876  |
| BAS 7529511                                                                       | 0501909   |
| 28.06.2003                                                                        | Solv.DMSO |

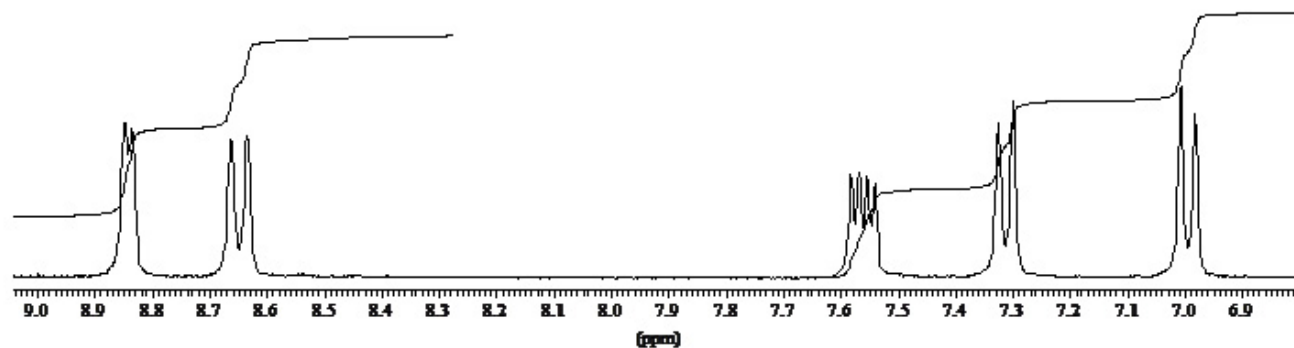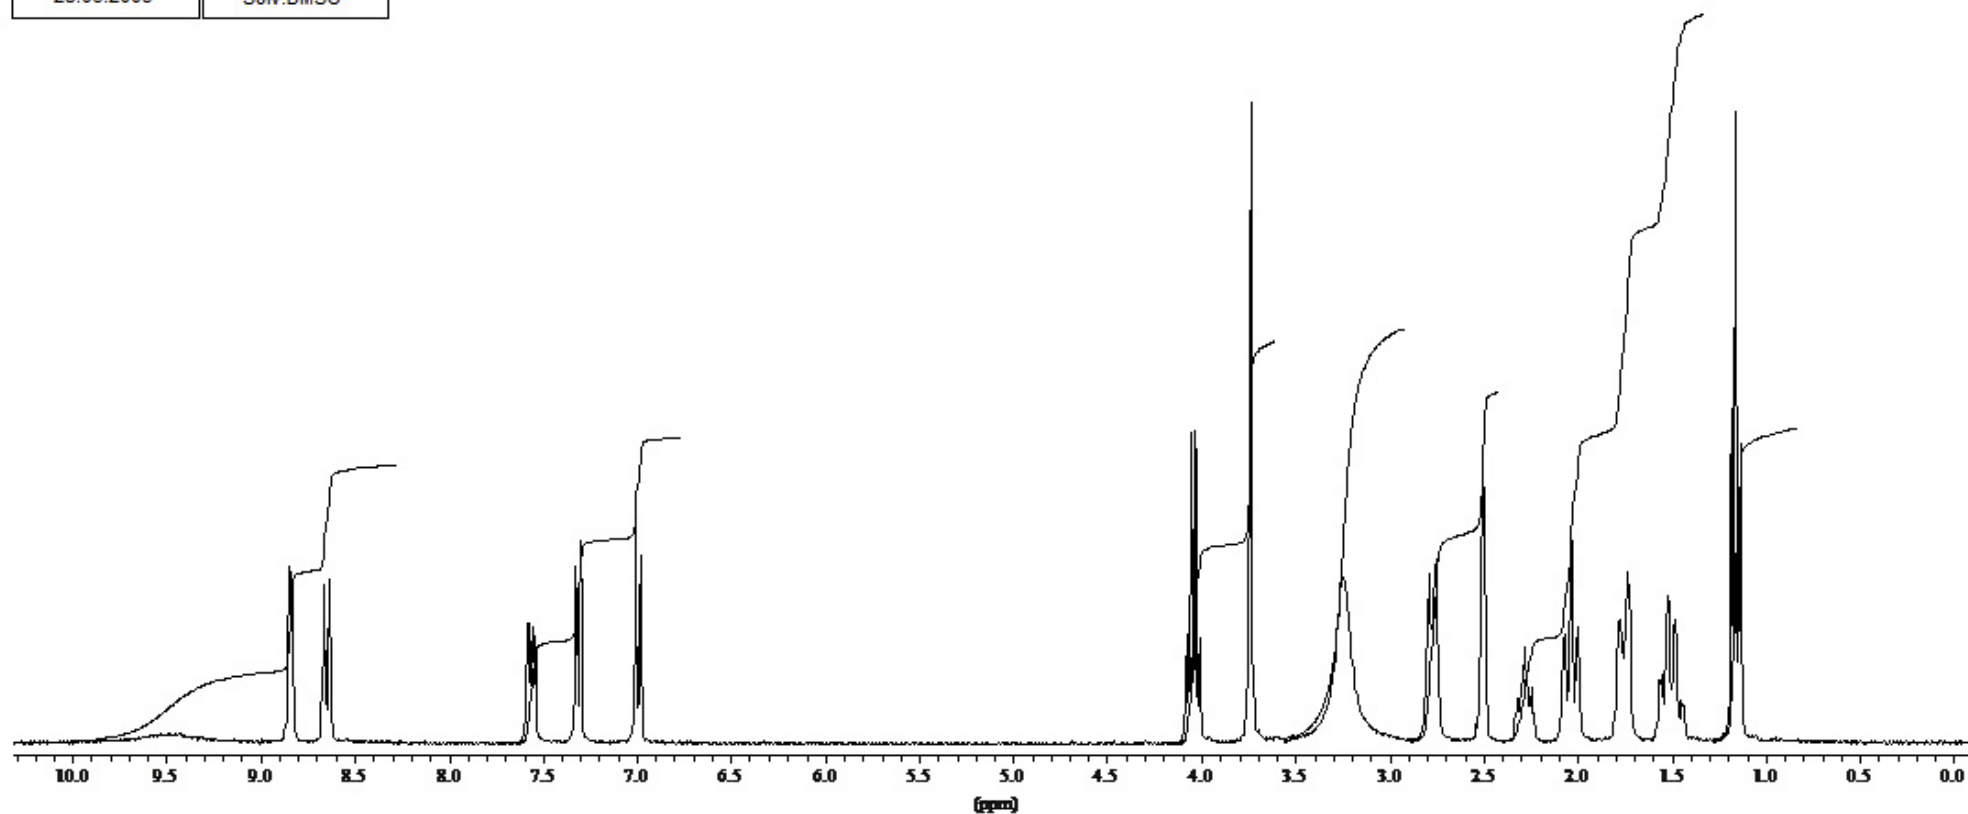

BAS 7529521

Q3-9

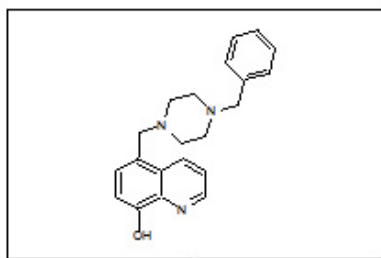

|                                                  |           |
|--------------------------------------------------|-----------|
| YAP 0000062                                      |           |
| *7529521*                                        |           |
| C <sub>21</sub> H <sub>23</sub> N <sub>3</sub> O | 333.4370  |
| BAS 7529521                                      | 0501916   |
| 28.06.2003                                       | Solv.DMSO |

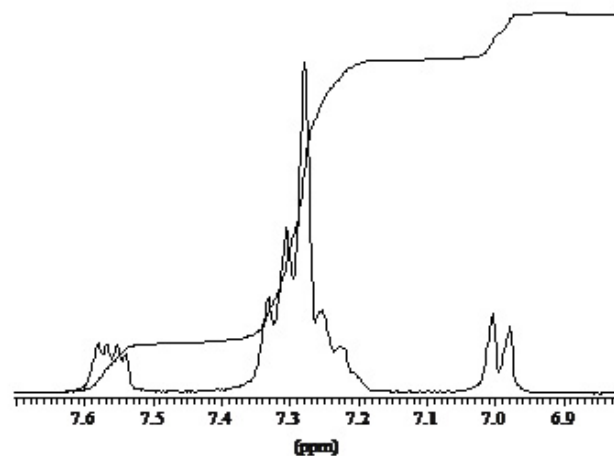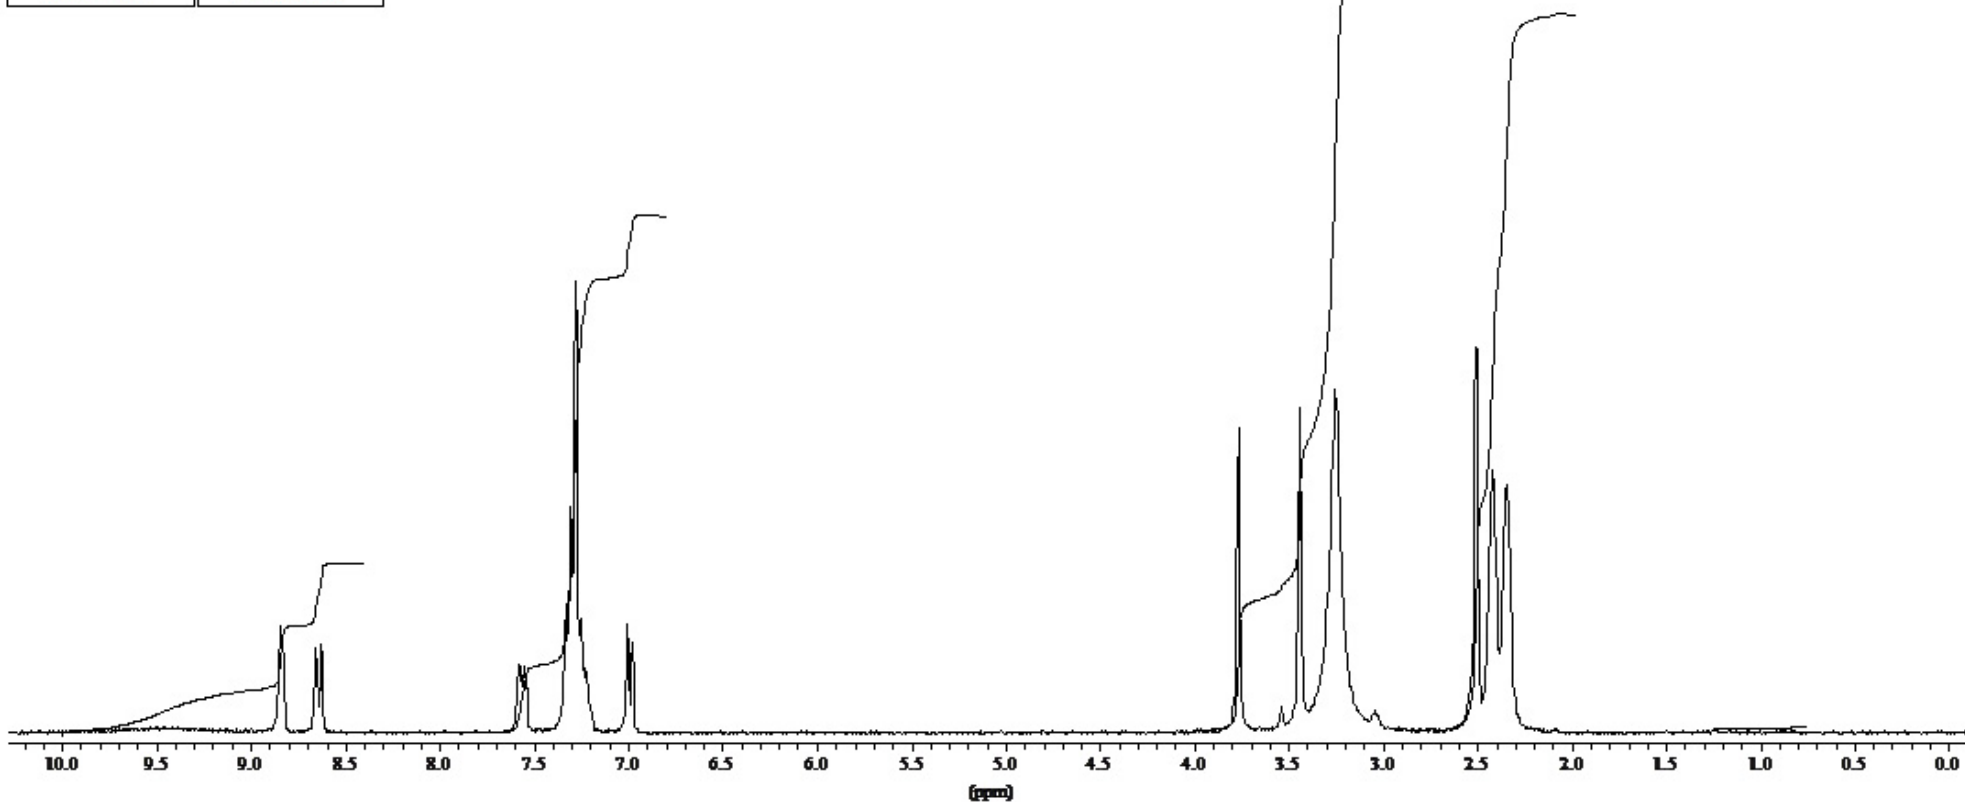

Q4-1

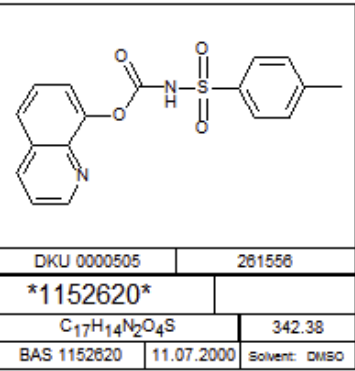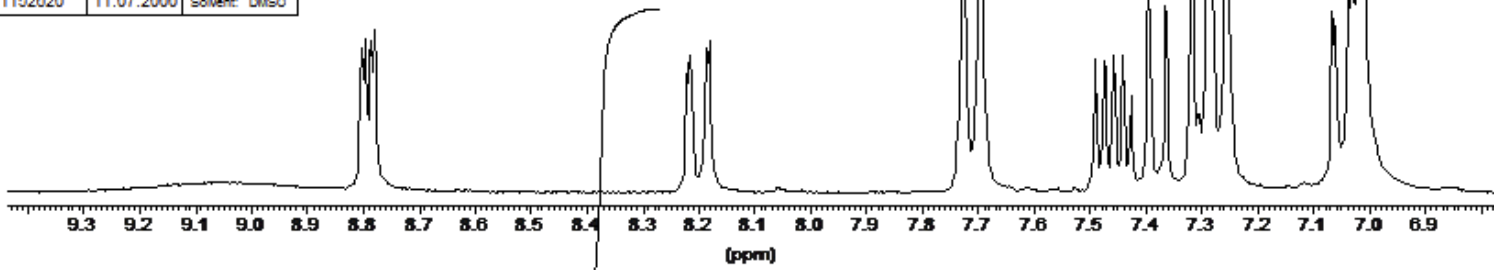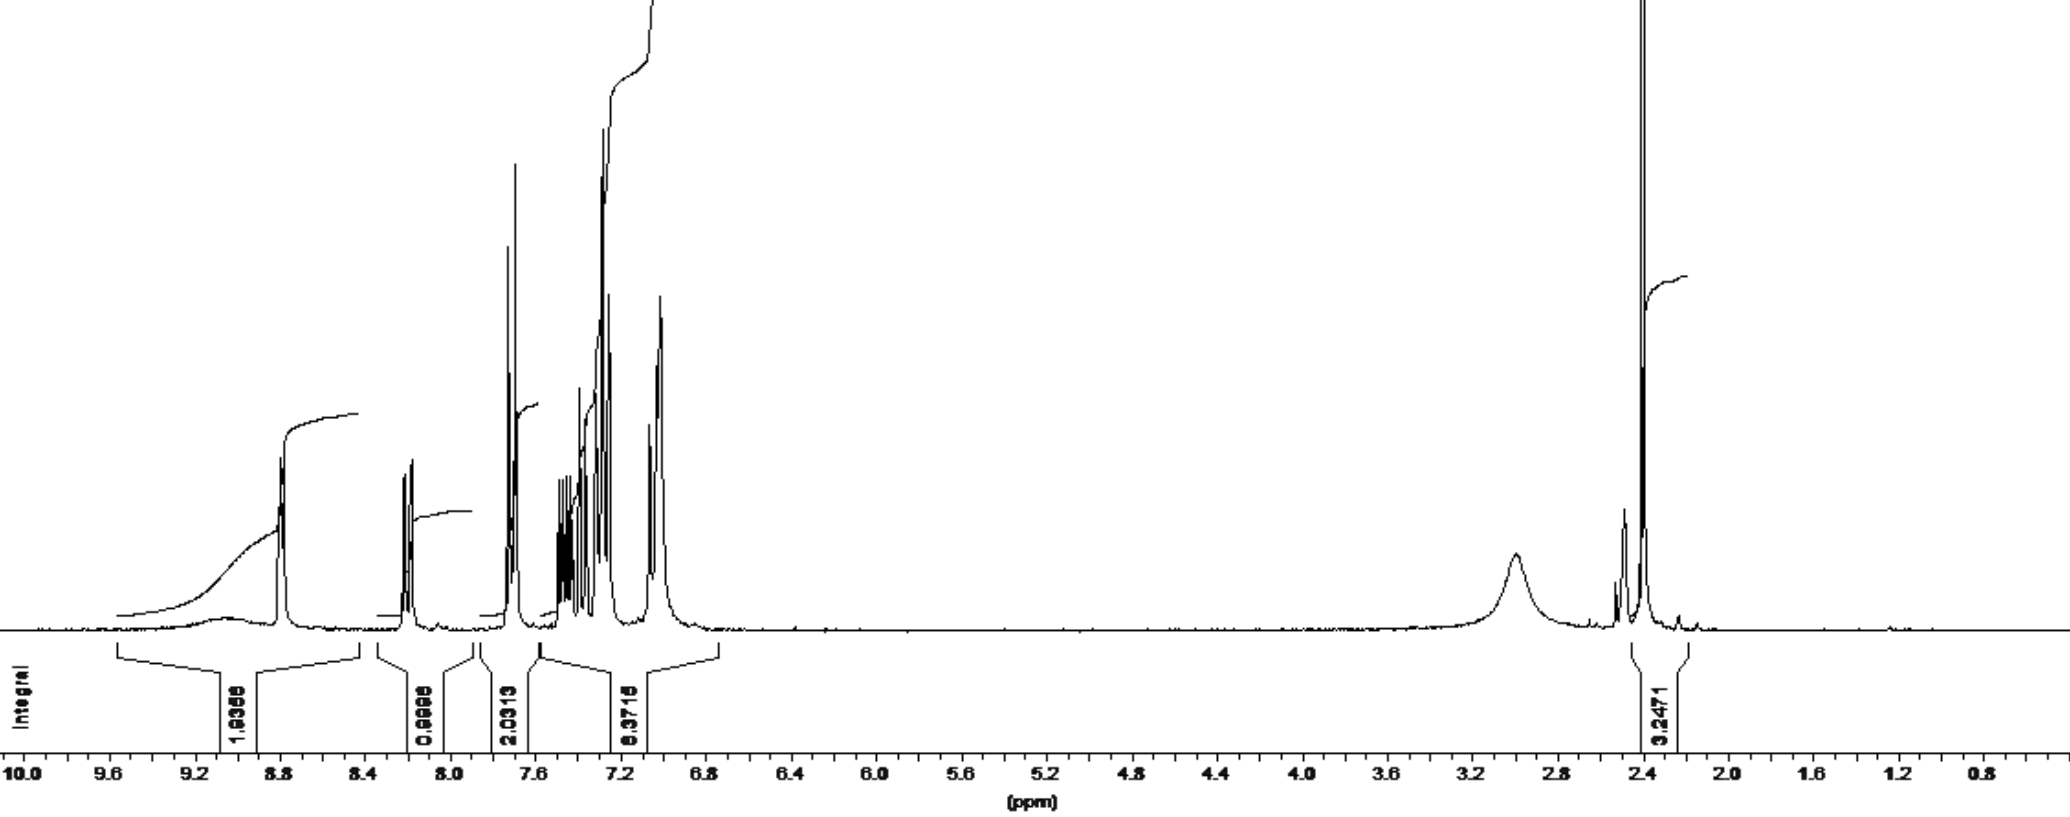



T0505-1839 Q5-1

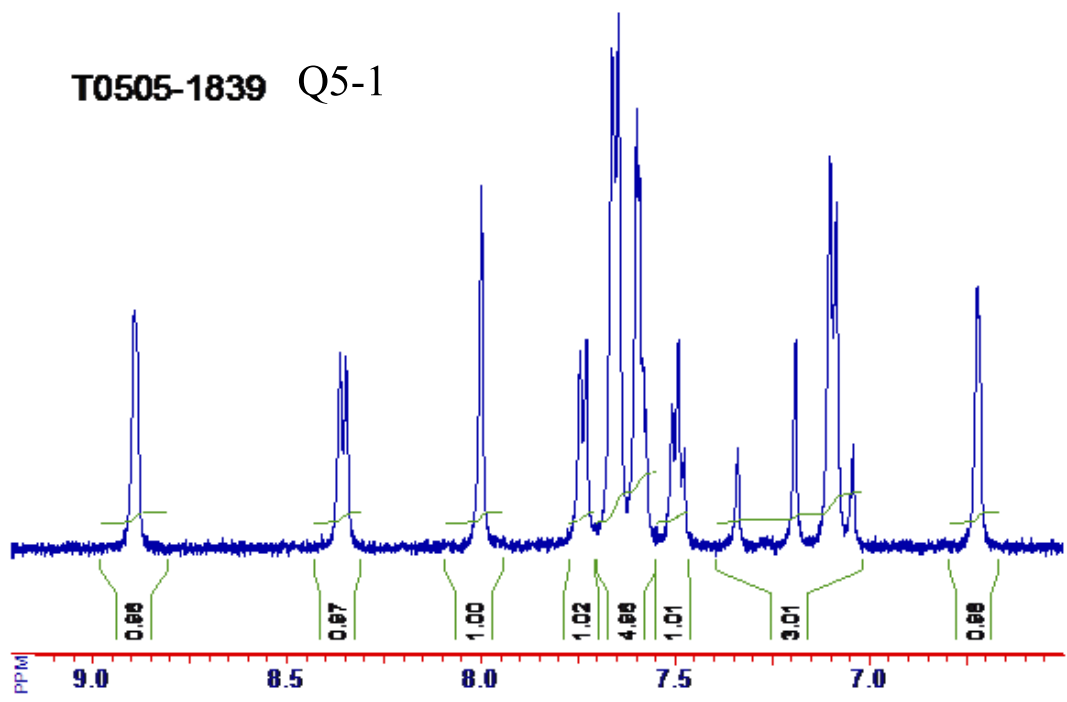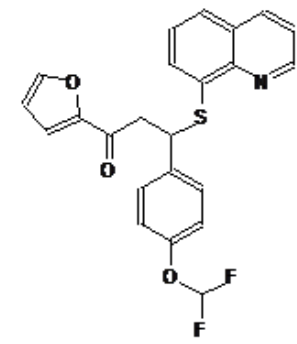

T0505-1839 C<sub>23</sub>H<sub>17</sub>F<sub>2</sub>N<sub>1</sub>O<sub>3</sub>S  
425.45

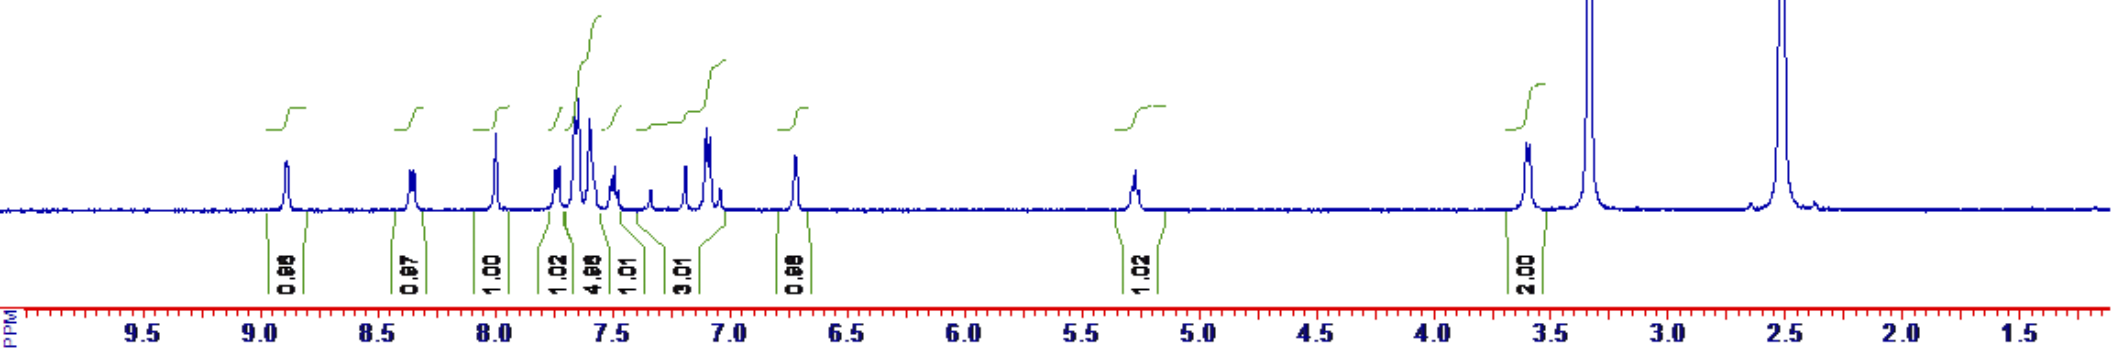

|                       |                    |                  |         |                            |                     |
|-----------------------|--------------------|------------------|---------|----------------------------|---------------------|
| File name: T0505-1839 | Vaskivska Lyudmila | SF: 500.0680 MHz | MSC: 1  | PW: 0.00 usec, RG: 200     | SI 65536            |
| Date: 18-Jan-2013     | Solvent: DMSO      | SW: 8503 Hz      | TE: 0 K | AQ: 1.93 sec, RD: 0.00 sec | <b>*T0505-1839*</b> |

T0506-1162 Q5-2

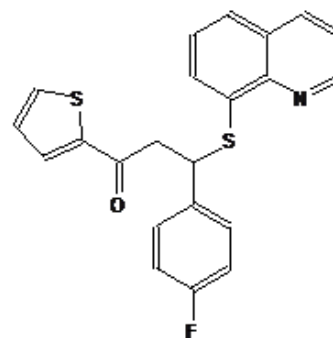

T0506-1162 Kovina-K-1 C<sub>22</sub>H<sub>16</sub>FNOS<sub>2</sub>  
393.49

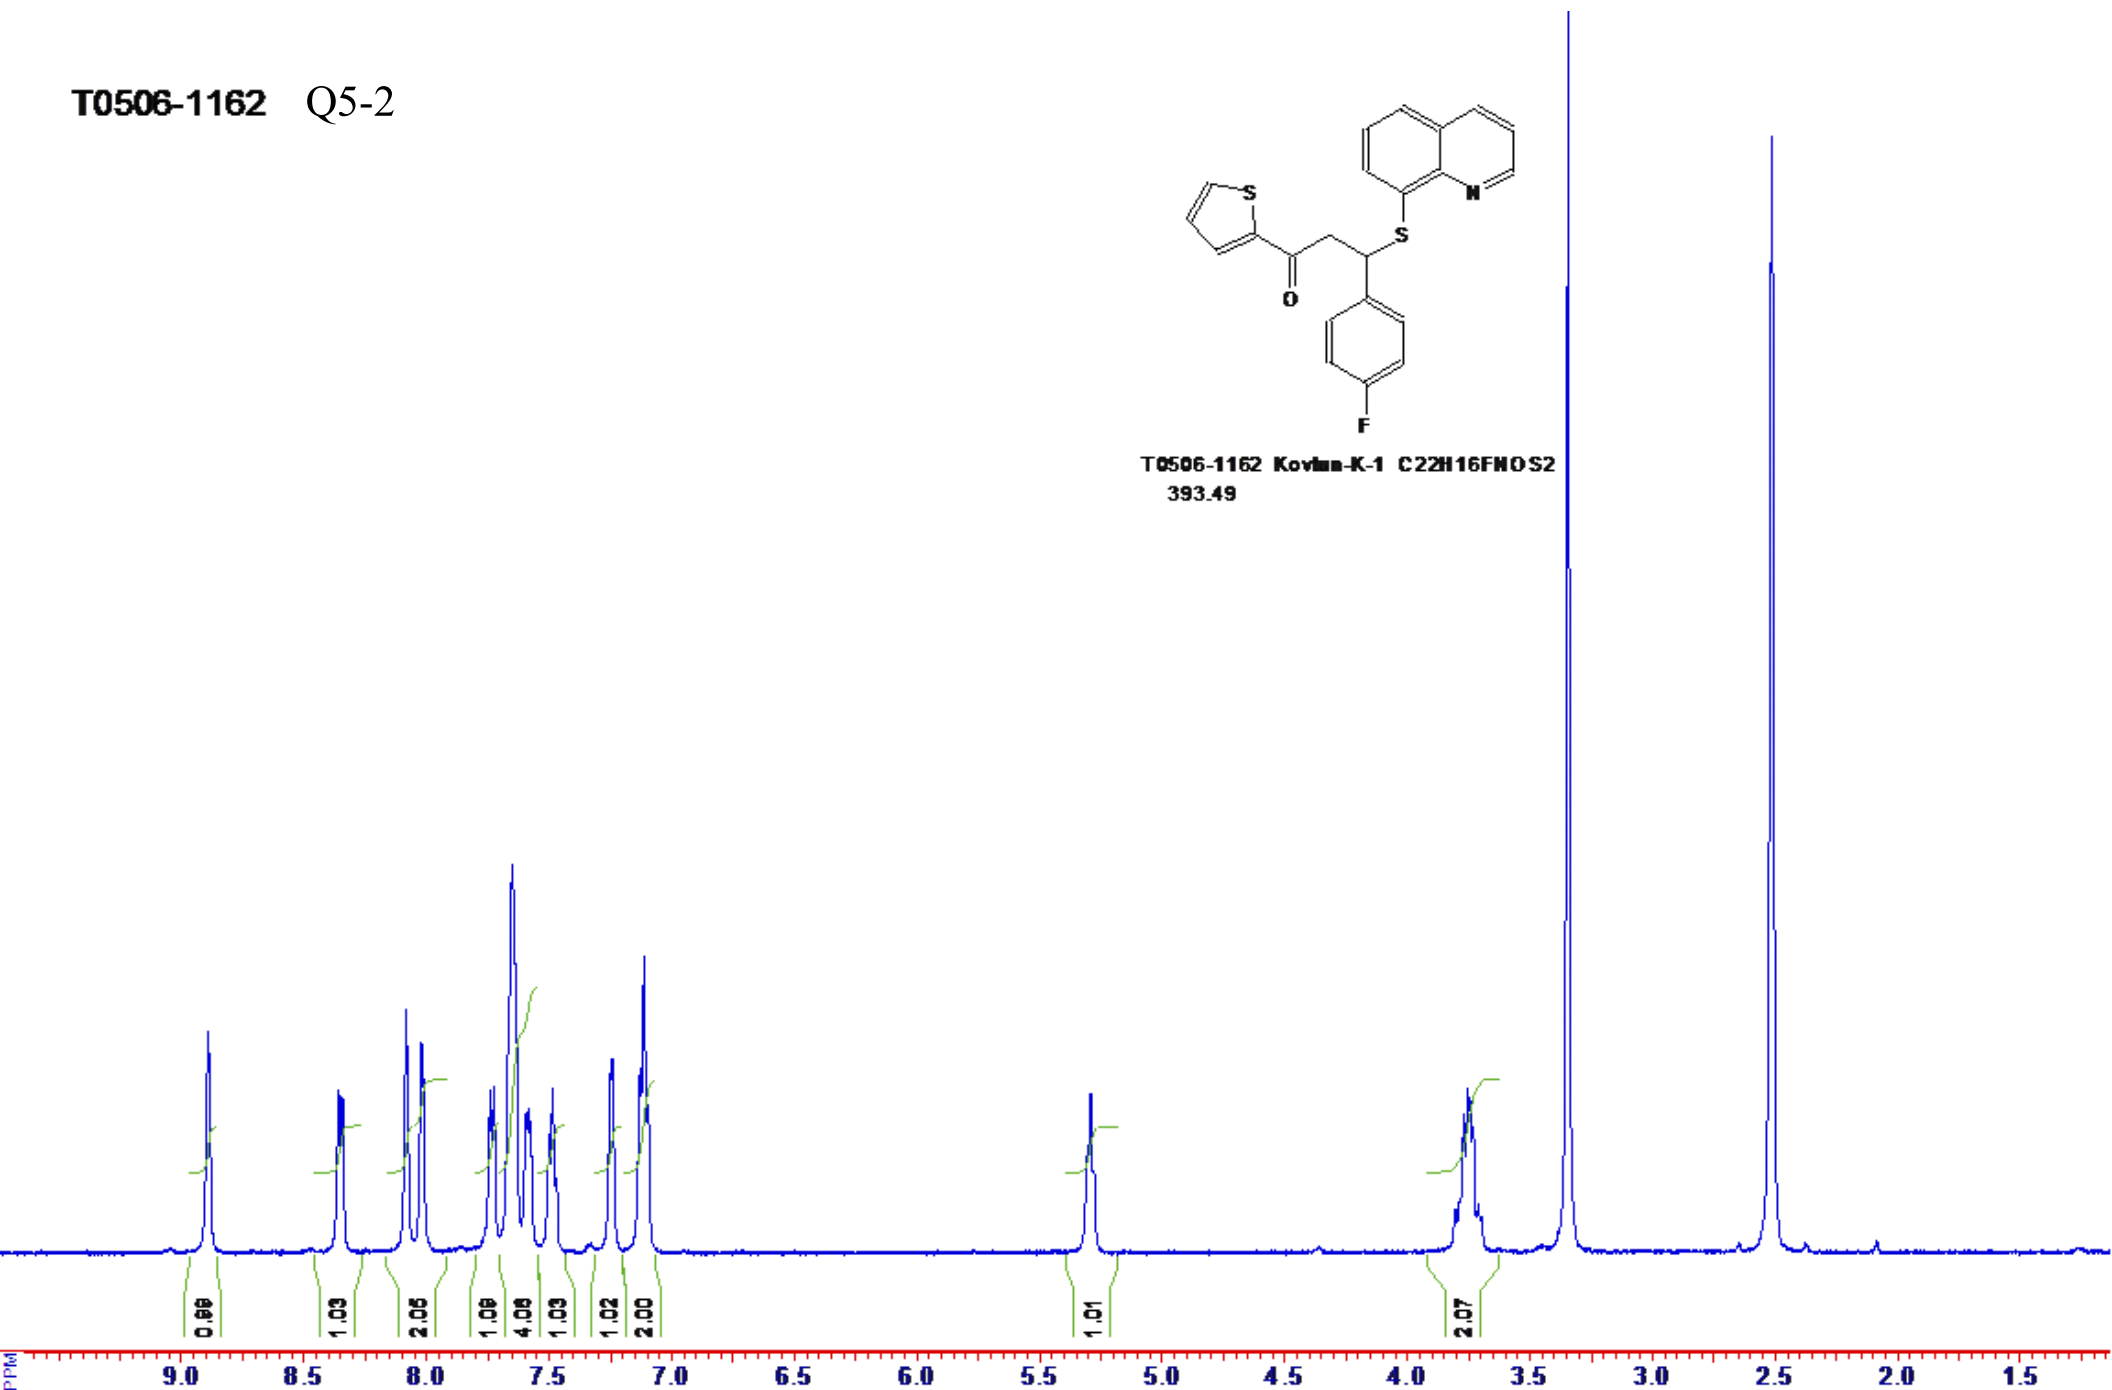

|                       |                   |                  |         |                            |                     |
|-----------------------|-------------------|------------------|---------|----------------------------|---------------------|
| File name: T0506-1162 | Vaskivska Lydmila | SF: 500.0680 MHz | MSC: 1  | PW: 0.00 usec, RG: 200     | SI 65536            |
| Date: 18-Jan-2013     | Solvent: DMSO     | SW: 8503 Hz      | TE: 0 K | AQ: 1.93 sec, RD: 0.00 sec | <b>*T0506-1162*</b> |
